# Supplementary material
Source: publisher figshare collection journal article supplement (https://acs.figshare.com/ndownloader/files/3886102)
Supplement: Supplementary file 1 [file 3886102]

## Sheet: t-test
Table S4: The list of full proteome quantification result
IPI accession	Gene name	Log2 intensity SAHA R1	Log2 intensity SAHA R2	Log2 intensity SAHA R3	Log2 intensity DMSO R1	Log2 intensity DMSO R2	Log2 intensity DMSO R3	-log10t-test p value	Log fold of change
IPI00024143	AAAS	27.2405	27.2676	26.4092	27.9969	27.8997	27.5835	1.29928	-0.854267
IPI00217272	AACS	30.4447	30.1714	30.1785	30.7355	30.3677	30.3592	0.657849	-0.222641
IPI00916402	AAK1	29.1046	28.5334	28.921	28.732	28.4035	28.6668	0.572491	0.252244
IPI00927731	AAMP	28.7178	28.8117	29.4733	28.9012	29.2721	30.0108	0.41511	-0.393731
IPI00910701	AARS	32.8665	33.0599	33.1535	33.4263	33.6263	33.6568	2.0893	-0.543156
IPI00394788	AARS2	26.0365	26.0748	25.726	25.8578	25.9461	25.5848	0.409715	0.14951
IPI00748490	AARSD1	29.7874	29.4405	29.1821	30.1338	29.7445	29.4855	0.546087	-0.317886
IPI00302238	AATF	25.4255	23.6839	25.8291	26.5238	24.2313	25.974	0.247485	-0.596835
IPI00874173	ABCA5	22.8155	22.8162	23.9796	23.0388	22.94	24.0998	0.104498	-0.155777
IPI00027481	ABCB1	28.2415	29.063	28.1259	29.0016	29.5304	28.7859	0.78754	-0.629183
IPI00015826	ABCB10	25.5258	25.9901	26.1036	24.8622	25.7489	25.2556	0.873027	0.584255
IPI00184848	ABCB11	23.1857	22.5278	24.8622	23.2544	23.1004	25.2097	0.124078	-0.329585
IPI00742677	ABCB6	21.1944	21.3146	22.6993	20.6786	20.827	22.2387	0.28385	0.487997
IPI00556553	ABCB7	28.9764	29.0403	28.8055	29.2911	28.8722	28.9776	0.299556	-0.106218
IPI00019022	ABCB8	26.3406	26.421	26.6434	25.7681	25.9033	25.977	2.23263	0.585557
IPI00719178	ABCC1	26.4653	26.5798	26.3374	26.4299	26.5082	25.9319	0.369202	0.170827
IPI00006675	ABCC4	21.9595	22.2633	22.2528	21.1387	21.0391	21.3806	2.62242	0.972412
IPI00291373	ABCD1	28.0163	27.1645	28.4167	26.9265	26.3686	27.2757	1.04392	1.0089
IPI00908804	ABCD3	30.1574	30.1928	30.3047	29.5272	29.5272	29.5858	3.80206	0.671587
IPI00023165	ABCD4	22.5346	23.2047	25.7599	22.0026	23.5232	25.8624	0.00815213	0.0369949
IPI00303207	ABCE1	32.378	31.9875	31.9142	32.6355	32.5496	32.298	1.07107	-0.401093
IPI00873899	ABCF1	31.6825	32.0323	32.3456	31.7361	32.0495	32.3162	0.0180039	-0.0137882
IPI00068506	ABCF2	32.0495	32.208	32.3162	32.8665	33.0752	33.0899	2.82353	-0.819291
IPI00465160	ABCF3	28.0302	27.3652	26.8099	27.9508	27.8689	27.0374	0.180567	-0.217255
IPI00060569	ABHD12	27.4269	26.7499	25.4463	27.0178	26.6215	25.1085	0.13036	0.291714
IPI00064462	ABHD13	23.0089	23.3268	21.0176	21.6358	23.077	21.1743	0.204678	0.488742
IPI00747859	ABHD14B	30.2125	29.9579	28.2065	30.6146	30.3878	28.5111	0.154371	-0.378859
IPI00290555	ABHD4	25.5966	26.7972	25.873	23.4968	25.212	24.8663	1.1542	1.56394
IPI00290979	ABHD5	23.3909	22.1224	22.8992	25.1574	21.1387	24.8885	0.275001	-0.924032
IPI00107039	ABHD6	27.1493	27.6357	26.7212	25.8658	26.3182	25.7659	1.70921	1.18544
IPI00480028	ABI1	30.3961	29.5078	29.848	30.2287	29.748	29.8026	0.0100268	-0.00913302
IPI00442210	ABI2	26.1665	26.3391	29.4624	27.8562	27.95	31.0235	0.470018	-1.62058
IPI00329488	ABL2	25.5156	25.5738	24.5817	25.9781	26.1913	25.3258	0.666588	-0.608063
IPI00515115	ABLIM1	24.2956	24.2285	25.3977	22.5304	22.583	23.639	1.52039	1.72316
IPI00030389	ABR	26.4333	25.8492	26.112	27.0022	26.5845	26.5015	1.15834	-0.56457
IPI00002938	ABT1	24.3365	27.7647	28.2595	25.4075	25.6967	27.2366	0.189779	0.67334
IPI00012828	ACAA1	27.7902	27.48	26.8023	26.662	26.3255	25.5788	1.26635	1.16876
IPI00001539	ACAA2	33.142	32.8843	33.3648	31.3647	31.1514	31.6665	2.98086	1.73619
IPI00396015	ACACA	31.3844	31.117	31.101	31.5835	31.3281	31.2985	0.717962	-0.20253
IPI00872885	ACACB	25.8578	26.6834	27.9877	26.2404	27.0588	28.2844	0.152921	-0.351533
IPI00747159	ACAD8	28.9612	29.287	28.3827	28.3521	28.8381	28.2565	0.545397	0.394693
IPI00152981	ACAD9	30.2294	30.4321	30.4357	29.6695	29.9028	29.8282	2.36803	0.565543
IPI00292695	ACADL	31.0254	31.089	31.4861	30.316	30.4064	30.8214	1.49612	0.685588
IPI00513827	ACADM	31.2703	31.2564	31.656	30.7402	30.8343	31.1245	1.32517	0.494589
IPI00027701	ACADS	30.9924	30.7823	30.9389	29.9489	29.7633	30.0061	3.3049	0.99844
IPI00024623	ACADSB	28.1989	27.9583	28.0811	27.4554	27.5174	27.287	2.5987	0.659464
IPI00028031	ACADVL	29.1962	29.8168	30.0534	27.9463	29.0212	28.9236	1.16322	1.05847
IPI00014264	ACAP2	27.2519	26.9732	27.2856	27.1136	26.7276	26.9188	0.773261	0.250201
IPI00550459	ACAP3	21.5556	22.7035	24.4241	21.4209	22.6993	24.5439	0.00168729	0.00636673
IPI00030363	ACAT1	30.5319	30.214	30.9116	30.0212	29.7848	30.3996	0.832168	0.483919
IPI00291419	ACAT2	27.0813	27.8624	28.0426	27.9665	28.6558	28.7431	0.9676	-0.793038
IPI00009315	ACBD3	29.2525	29.1995	29.7532	28.8355	28.723	29.2676	0.884213	0.459701
IPI00216847	ACBD4	24.4533	24.2087	23.8635	23.1462	22.8115	22.8992	2.45486	1.22288
IPI00186681	ACBD5	27.7709	27.9863	27.5334	27.4618	27.5182	27.0102	0.98016	0.433434
IPI00007334	ACIN1	30.5327	30.8768	30.1271	30.9816	31.3446	30.4052	0.498414	-0.39828
IPI00021290	ACLY	32.3424	32.1934	32.1529	32.976	32.8162	32.7162	2.50861	-0.606564
IPI00008485	ACO1	30.6624	30.4499	30.463	30.9192	30.8104	30.7955	1.79431	-0.316611
IPI00017855	ACO2	34.1494	34.2131	33.8374	33.1617	33.228	32.9812	2.62562	0.943006
IPI00382844	ACO2	31.8736	32.4347	32.298	31.0826	31.3618	31.1914	2.21037	0.990155
IPI00020530	ACOT13	24.8885	22.3502	25.8866	24.802	23.5293	25.8532	0.101588	-0.353034
IPI00220906	ACOT2	29.6972	29.5717	29.693	29.5732	29.5436	29.4	1.03232	0.148361
IPI00010415	ACOT7	30.9449	30.828	30.7854	31.0148	30.8751	30.7636	0.134473	-0.0317078
IPI00298202	ACOT8	27.3756	26.3182	26.9208	26.6766	25.599	26.4669	0.623626	0.624011
IPI00646015	ACOT9	30.0246	30.1742	28.4989	29.4143	29.5514	27.8581	0.338497	0.624608
IPI00296907	ACOX1	26.7786	22.1619	21.9062	26.5302	20.2899	21.1944	0.139145	0.944075
IPI00020226	ACOX3	25.3673	26.7382	25.9661	23.6511	24.5353	24.557	1.63401	1.77608
IPI00218847	ACP1	30.1862	29.9253	29.5361	30.2726	29.9863	29.7398	0.183045	-0.117033
IPI00003807	ACP2	24.79	25.0494	24.5334	24.6078	25.1155	24.4879	0.0780174	0.0538851
IPI00909579	ACSF2	27.6398	28.4929	28.5334	27.4018	28.6911	28.3285	0.0585818	0.0815646
IPI00012728	ACSL1	28.362	28.7087	27.8831	28.2548	28.6931	27.5444	0.138143	0.153796
IPI00031397	ACSL3	28.7142	28.4011	28.7178	28.932	28.5823	28.7022	0.363366	-0.127773
IPI00029737	ACSL4	29.8868	28.921	28.8967	29.9895	29.0403	29.0591	0.101866	-0.128159
IPI00401990	ACSL5	26.5362	26.2691	26.5727	27.4187	27.0264	27.2948	2.19812	-0.787285
IPI00549564	ACSS2	29.6438	29.6111	29.5227	28.5201	28.4075	28.2647	3.88464	1.19512
IPI00021428	ACTA1	33.505	34.2025	33.0138	33.5653	34.0294	33.0599	0.0166034	0.022227
IPI00003269	ACTBL2	26.421	25.6646	30.8557	25.7725	25.7315	30.7882	0.0312579	0.216345
IPI00021440	ACTG1	28.0929	28.0764	27.8807	29.2212	29.2273	28.9387	3.16464	-1.11237
IPI00003627	ACTL6A	30.3422	30.1966	30.4518	31.0746	31.0037	31.2818	2.67926	-0.789829
IPI00013508	ACTN1	34.1319	34.1046	34.1945	33.7374	33.6733	33.7718	3.34891	0.416196
IPI00759776	ACTN1	26.3275	25.1085	25.0118	25.8016	24.7233	24.577	0.321108	0.448649
IPI00013808	ACTN4	35.4026	35.5025	35.0176	35.1234	35.2258	34.5765	0.594462	0.332312
IPI00302690	ACTR10	27.9853	26.8099	26.9029	27.9695	26.9341	26.6869	0.0219884	0.0358861
IPI00029468	ACTR1A	30.8202	30.7763	29.9458	30.979	31.0254	30.2404	0.242221	-0.234207
IPI00029469	ACTR1B	29.8911	29.9098	27.5249	30.1076	30.1362	27.643	0.0564409	-0.187008
IPI00470573	ACTR2	31.8464	31.8803	31.4838	31.8536	31.9625	31.5502	0.105805	-0.0519307
IPI00028091	ACTR3	32.1571	32.0997	32.6103	32.117	32.1743	32.5534	0.0116467	0.00747172
IPI00292787	ACTR5	23.3827	23.3066	24.4766	24.5411	24.3838	25.5429	0.984564	-1.10065
IPI00171779	ACTR6	23.4415	22.5225	23.8333	23.3339	22.9576	23.7671	0.067022	-0.0871213
IPI00025646	ACTR8	21.5699	23.434	22.365	23.1566	24.4584	22.54	0.521929	-0.928689
IPI00945211	ACY1	21.3944	21.4823	21.9416	22.2357	22.2682	21.689	0.839843	-0.458178
IPI00221117	ACYP1	28.1398	28.4075	27.5575	27.4862	27.738	27.1278	0.886651	0.584288
IPI00296441	ADA	28.8484	29.3128	29.6906	28.497	29.1692	29.3738	0.306391	0.270573
IPI00783550	ADAL	24.3124	23.8966	23.431	23.5597	23.4946	23.3919	0.69999	0.397937
IPI00013897	ADAM10	29.9073	29.8971	29.6807	29.7445	29.6148	29.5384	0.962613	0.195794
IPI00288894	ADAM17	29.1553	29.4855	29.7971	28.8156	28.8355	29.1809	1.14443	0.535322
IPI00440932	ADAM9	22.9769	27.1603	26.4633	23.372	27.6004	26.5558	0.059016	-0.309219
IPI00219597	ADAMTS14	29.9084	30.0271	28.9438	29.5373	29.4391	28.5817	0.408144	0.440419
IPI00394668	ADAR	22.1949	22.1949	22.1987	22.9222	22.8397	22.1619	0.859066	-0.445098
IPI00020368	ADARB1	22.398	21.5022	23.5905	21.4001	20.6589	22.8397	0.417778	0.864023
IPI00787836	ADCK1	25.1892	24.5867	24.6824	25.6917	25.0179	25.0482	0.682683	-0.433148
IPI00220158	ADD1	29.0139	29.4681	30.5625	28.2536	28.6988	29.9895	0.431883	0.700872
IPI00004408	ADD3	27.9379	27.8383	27.2519	28.5714	27.408	27.8358	0.260347	-0.262392
IPI00746777	ADH5P4;ADH5	30.9423	30.7612	31.4377	30.9997	30.8511	31.5299	0.0992083	-0.0798442
IPI00908386	ADH7	29.8888	29.6575	28.8019	30.3732	30.2108	29.512	0.618592	-0.582566
IPI00651738	ADI1	24.3106	22.7417	20.4845	24.2742	23.0446	20.9548	0.0576352	-0.245614
IPI00290279	ADK	29.8708	29.3052	29.6017	29.0291	28.6603	28.521	1.73391	0.855799
IPI00022215	ADNP	28.2235	28.1893	28.3589	28.9194	29.0805	28.9852	3.34368	-0.737808
IPI00045939	ADO	25.4893	26.2198	26.3004	25.1114	26.1945	26.1498	0.158006	0.18459
IPI00009258	ADPRH	28.079	27.2127	28.2728	28.5182	27.2956	28.6392	0.213393	-0.296181
IPI00015865	ADPRHL2	26.8047	27.166	28.1295	26.421	26.9655	28.0403	0.133656	0.224438
IPI00012497	ADRBK1	27.2366	27.3425	25.8334	27.5174	27.6371	25.8658	0.0966397	-0.202641
IPI00019926	ADRBK2	21.0509	21.1545	25.2848	21.2229	21.3347	22.678	0.196382	0.75157
IPI00033030	ADRM1	27.5133	26.6168	27.2243	27.9305	27.0075	27.6796	0.478969	-0.421043
IPI00942092	ADSL	30.7438	30.5411	31.4035	30.9727	30.828	31.7361	0.299413	-0.282811
IPI00026833	ADSS	30.8391	30.8693	30.3226	31.2909	31.3631	30.7087	0.747321	-0.443915
IPI00170914	ADSSL1	29.2611	29.5698	29.2831	28.4559	28.6253	28.341	2.64562	0.897286
IPI00745313	AEBP1	29.1924	28.644	29.7911	27.2669	28.0403	28.2516	1.41472	1.35624
IPI00796417	AEBP2	19.6865	19.7401	21.4506	22.1888	22.2138	23.4029	1.51525	-2.30945
IPI00074083	AEN	22.058	22.0948	23.3175	24.5114	24.3541	25.4994	1.86262	-2.29822
IPI00432493	AES	27.4844	28.5392	28.4178	27.2161	28.5594	28.4735	0.0398351	0.0641371
IPI00910135	AFAP1	25.1114	26.3811	25.1892	25.0648	26.1777	24.9366	0.106142	0.167546
IPI00001091	AFG3L2	30.4226	30.5327	30.2845	29.8408	30.2333	29.7708	1.35164	0.464994
IPI00026259	AGA	28.8381	28.6178	29.1276	27.8401	27.5314	28.1122	2.0065	1.03329
IPI00456242	AGAP1	27.482	27.287	27.1688	27.0852	27.307	27.0693	0.59531	0.158768
IPI00442323	AGAP3	21.6641	21.747	23.0149	20.5139	20.6709	22.1528	0.688017	1.02947
IPI00163185	AGAP3	27.5722	27.3464	27.5954	27.7697	27.4436	27.6448	0.390793	-0.114712
IPI00903328	AGFG1	28.4647	28.4963	29.3516	28.2969	28.4781	28.7562	0.336279	0.260475
IPI00418238	AGFG2	25.6624	25.344	27.3462	24.8607	24.5154	26.3973	0.433663	0.859695
IPI00018027	AGGF1	29.131	29.4733	31.1391	28.8553	28.8079	30.7147	0.198443	0.455181
IPI00019353	AGK	27.5191	27.8869	28.406	27.3988	27.7073	28.2548	0.15687	0.150339
IPI00328318	AGL	28.7518	28.9225	28.3271	28.7829	28.763	28.2823	0.0848321	0.0577068
IPI00019141	AGPAT1	24.9074	24.4018	24.0709	24.3047	23.9493	23.2128	0.723835	0.637742
IPI00749011	AGPAT3	26.3196	26.5224	26.7604	26.3205	26.6486	26.7458	0.0725832	-0.0374845
IPI00016070	AGPAT6	24.4314	24.3386	24.2633	24.557	23.737	24.2614	0.259217	0.159271
IPI00140301	AGPAT9	25.9007	24.4791	24.2675	26.194	24.6336	23.9232	0.01351	-0.0344899
IPI00010349	AGPS	31.4716	31.3647	31.7839	30.8831	30.8768	31.2269	1.47709	0.544431
IPI00167865	AGTPBP1	22.0977	22.298	23.4968	21.9931	22.2387	23.552	0.0184922	0.0362587
IPI00216928	AGXT2L2	24.289	23.2501	22.4401	25.2643	22.9266	21.8943	0.0102892	-0.0353273
IPI00217957	AHCTF1P1;AH	24.9393	25.8303	26.2868	25.5459	26.3838	26.6024	0.409443	-0.491873
IPI00012007	AHCY	34.2025	34.3931	33.9934	34.6002	34.7462	34.3931	1.16849	-0.383511
IPI00182938	AHCYL1	33.6263	33.5216	33.5653	33.3286	33.1937	33.0319	1.8793	0.386339
IPI00908473	AHCYL2	29.9232	29.8216	29.8888	29.5858	29.6188	29.6738	2.51323	0.251791
IPI00397015	AHDC1	24.7854	24.7373	22.5179	24.5653	24.7649	22.7972	0.00977117	-0.0289237
IPI00021812	AHNAK	36.3712	36.5511	36.5511	36.2152	36.2152	36.0586	1.83768	0.328114
IPI00856045	AHNAK2	27.0414	25.2573	26.0443	26.978	25.3042	26.0673	0.00100339	-0.00217692
IPI00025277	AHRR	27.4416	27.3061	27.9019	27.2837	27.2031	27.8128	0.167487	0.116695
IPI00930049	AHRR	30.1375	30.0951	30.6621	30.1574	30.0061	30.624	0.0469633	0.0357297
IPI00030706	AHSA1	30.5411	30.8579	30.6767	31.1559	31.3701	31.2625	2.17377	-0.570906
IPI00303602	AIDA	25.5557	23.6768	24.2851	25.7379	23.693	23.3268	0.0972731	0.253254
IPI00553214	AIF1L	26.8918	27.1756	27.3405	26.4137	26.4866	26.7676	1.57101	0.580025
IPI00000690	AIFM1	31.7608	31.8756	32.148	30.7574	30.901	31.6176	1.3492	0.836128
IPI00013909	AIFM2	26.5543	28.6755	28.9886	24.7197	26.4808	26.3505	1.09814	2.22252
IPI00793201	AIMP1	30.0021	30.8223	29.8425	30.5255	31.2529	30.2108	0.436396	-0.440788
IPI00011916	AIMP2	28.0651	28.9717	29.2734	28.6096	29.5287	29.7859	0.455555	-0.538017
IPI00925804	AIP	28.5477	28.7205	28.362	28.9717	29.1623	28.9164	1.68584	-0.473413
IPI00640817	AK1	30.0043	29.8963	29.2931	29.3795	29.3921	28.1932	0.750049	0.742954
IPI00215901	AK2	32.3663	32.298	32.097	31.7815	31.7633	31.4389	1.90096	0.592522
IPI00465256	AK3	31.6685	31.6419	31.457	30.3368	30.3924	30.1111	3.56398	1.30907
IPI00022585	AKAP1	25.3174	25.2018	25.9723	25.6103	25.234	26.0193	0.13896	-0.124044
IPI00306265	AKAP10	25.4293	26.2899	25.8436	25.3767	26.1498	25.6526	0.140976	0.127913
IPI00032064	AKAP2;PALM2-AKAP2	25.9806	25.1721	27.5598	25.1764	24.8851	27.4228	0.142515	0.409416
IPI00014474	AKAP8	26.6784	23.7017	25.9286	26.8964	24.5665	26.484	0.181311	-0.546068
IPI00297455	AKAP8L	25.7836	25.2219	25.1466	25.7175	25.5557	25.2643	0.206299	-0.128481
IPI00220628	AKAP9	28.4929	28.8851	27.3618	28.2959	28.6006	27.4994	0.0713873	0.114646
IPI00930224	AKD1	28.3993	23.9603	29.2143	23.83	23.8282	24.8557	0.840279	3.02003
IPI00220271	AKR1A1	30.8177	30.4021	30.7198	30.8214	30.3138	30.658	0.0888231	0.0487696
IPI00413641	AKR1B1	35.8075	35.3299	35.6587	33.5328	32.9972	33.3071	3.41991	2.31968
IPI00105407	AKR1B10	31.7306	32.4939	32.0848	30.0282	30.5462	30.3032	2.61054	1.81058
IPI00455023	AKR1B15	29.6872	30.067	30.5095	29.2513	29.1784	29.0554	1.71503	0.926182
IPI00005668	AKR1C2	29.5872	29.3962	28.5142	29.1713	29.0031	28.0559	0.368674	0.422457
IPI00153045	AKR1E2	27.9782	28.5092	23.0263	27.8451	28.2714	22.7685	0.0283379	0.209554
IPI00305978	AKR7A2	28.0581	27.4592	27.7887	28.0984	27.2305	27.4388	0.223282	0.179394
IPI00012866	AKT1	26.2039	26.194	26.417	26.1076	26.0813	26.417	0.207253	0.0696576
IPI00306195	AKT1S1	24.5778	22.8085	24.1826	25.2573	23.3753	24.6934	0.308814	-0.585722
IPI00012870	AKT2	27.8881	27.1022	26.5774	27.3027	26.6121	26.3335	0.388089	0.439804
IPI00936141	AKTIP	23.2716	23.8017	22.298	23.5401	23.6511	22.0887	0.0151112	0.0305049
IPI00442121	ALAD	30.4143	30.5213	30.424	30.3769	30.4778	30.2643	0.496522	0.0802072
IPI00015102	ALCAM	28.6271	28.9661	28.5619	28.1413	28.461	28.1669	1.3349	0.461969
IPI00217920	ALDH16A1	27.6732	26.8217	26.9061	28.2873	27.466	27.5733	0.792639	-0.641857
IPI00008982	ALDH18A1	33.3868	33.1319	32.9972	33.2557	32.917	32.9068	0.377319	0.145486
IPI00218914	ALDH1A1	24.6449	24.5444	25.6825	22.1224	22.0096	23.3574	1.91832	2.46081
IPI00216805	ALDH1A2	26.8356	26.6766	25.6526	25.7452	24.9625	23.2993	0.994335	1.71925
IPI00103467	ALDH1B1	31.3489	31.3281	31.3421	30.3924	30.0413	30.1742	3.42495	1.13707
IPI00793673	ALDH1L1	30.2473	30.9116	30.0634	30.4321	30.7015	29.9434	0.0489047	0.048481
IPI00298308	ALDH1L2	32.7633	32.6606	32.5832	32.7814	32.7441	32.5442	0.0816859	-0.0208588
IPI00006663	ALDH2	33.6973	33.7374	33.142	32.4232	32.5167	32.1664	2.21154	1.15676
IPI00394758	ALDH3A2	29.7398	30.1362	30.1522	29.2159	29.4905	29.593	1.51598	0.576261
IPI00018031	ALDH3B1	22.7693	23.693	23.9287	20.7895	20.3803	22.306	1.55158	2.30509
IPI00217871	ALDH4A1	28.9952	28.9612	27.912	27.6563	27.4151	26.7332	1.40189	1.35456
IPI00336008	ALDH5A1	24.6336	24.3659	25.5304	24.6096	24.2444	25.0287	0.198183	0.215714
IPI00024990	ALDH6A1	29.5989	29.6409	29.6056	28.1684	28.3252	28.53	3.56895	1.27389
IPI00221234	ALDH7A1	25.557	24.0572	24.8202	25.7617	24.6824	25.1114	0.281393	-0.373697
IPI00479877	ALDH9A1	29.4531	28.6501	29.8168	29.4833	28.6585	29.6797	0.0235665	0.0328147
IPI00796333	ALDOA	35.1425	35.1425	35.447	34.4637	34.3931	34.8014	1.88879	0.691246
IPI00792375	ALDOC	28.0559	28.467	27.8309	26.2458	26.3103	25.6716	2.75256	2.04201
IPI00418262	ALDOC	31.455	31.1814	30.6277	30.2753	29.8368	29.0291	1.45494	1.37431
IPI00002506	ALG5	27.7166	27.1493	26.8296	27.557	27.0543	26.6223	0.153706	0.154015
IPI00234857	ALG9	25.1139	24.9036	25.1381	25.0568	24.9207	24.5543	0.549353	0.207945
IPI00076597	ALKBH3	26.2664	25.8209	24.8663	26.5531	25.9567	25.1474	0.150797	-0.234554
IPI00759562	ALKBH5	26.7264	26.9807	27.0313	26.5341	27.1022	27.262	0.0781816	-0.0532945
IPI00218915	ALOX12	23.6747	23.5464	24.7547	23.7252	23.5905	24.7422	0.0172088	-0.0273749
IPI00419916	ALPL	24.1136	23.9508	22.997	21.5699	21.5799	20.8947	2.30965	2.33897
IPI00295004	ALS2	23.9263	21.1318	25.0041	23.3423	19.6865	24.395	0.182592	0.879475
IPI00925719	AMDHD2	24.6201	24.4509	23.6164	22.7233	22.6616	22.2138	2.08071	1.69625
IPI00423874	AMFR	23.4505	24.647	24.5598	24.5681	23.945	25.5738	0.319591	-0.476519
IPI00022258	AMMECR1	24.8202	24.8807	22.4516	25.844	25.873	23.3157	0.340713	-0.960072
IPI00027790	AMMECR1L	21.9017	21.9244	23.1857	20.6378	20.7982	22.2185	0.785254	1.11909
IPI00032236	AMOTL2	26.547	26.154	26.0422	26.8669	26.7458	26.4141	0.981525	-0.427893
IPI00007722	AMPD2	32.4464	32.3663	32.7706	32.2585	32.2206	32.6949	0.280045	0.136448
IPI00411384	AMPD3	30.7799	30.901	30.6034	30.2125	30.0932	29.9269	2.3334	0.683903
IPI00033907	ANAPC1	27.1382	26.5578	26.5935	27.1152	26.5811	26.5412	0.0219018	0.0173035
IPI00007088	ANAPC10	24.4686	23.7252	25.5633	26.2039	24.4349	27.134	0.631614	-1.3386
IPI00787159	ANAPC11	23.0894	23.577	24.2186	23.5089	24.3047	24.5583	0.472273	-0.495632
IPI00002549	ANAPC2	24.8511	22.1396	25.381	24.5641	23.41	25.5459	0.118263	-0.382751
IPI00002551	ANAPC4	26.4825	26.3287	26.3205	26.1719	26.4299	26.2514	0.427805	0.0928205
IPI00008247	ANAPC5	26.3642	25.3318	24.6078	26.5663	25.486	25.6963	0.325831	-0.481647
IPI00008248	ANAPC7	28.2157	27.8358	28.1541	28.6733	28.2013	28.7849	1.06363	-0.484631
IPI00298147	ANGEL1	22.1744	21.0445	20.9626	20.3803	19.9687	19.3444	1.41192	1.49602
IPI00007800	ANGPTL2	27.576	27.8544	27.6489	27.1857	27.2743	27.4269	1.65941	0.397504
IPI00159899	ANKFY1	30.474	28.481	29.8868	31.2985	28.8304	29.9814	0.172813	-0.422847
IPI00215869	ANKH	23.1566	20.8625	20.8134	23.2047	21.0735	20.6896	0.0135579	-0.0450859
IPI00815707	ANKHD1;ANKHD1-EIF4EBP3	27.2497	26.2412	27.7317	27.6802	26.4785	27.9375	0.175742	-0.291208
IPI00292914	ANKIB1	26.4899	25.8023	26.6499	26.3898	25.7078	26.3992	0.160945	0.148441
IPI00829741	ANKLE2	24.5449	24.3401	23.3452	25.0369	24.8931	24.0639	0.542425	-0.587882
IPI00470422	ANKMY2	28.2823	28.362	28.1362	28.222	28.4647	28.0817	0.0103033	0.00406265
IPI00217831	ANKRD13A	24.7613	24.4911	18.9655	24.7686	24.6201	19.2139	0.0161896	-0.128274
IPI00784020	ANKRD17	29.7511	29.303	29.3776	30.067	29.6632	29.705	0.820582	-0.33452
IPI00477505	ANKRD28	28.5012	28.7585	28.6718	28.5161	28.7249	28.857	0.167864	-0.055493
IPI00337574	ANKRD39	19.917	20.0776	29.4207	20.3469	20.5212	23.0516	0.218787	1.83188
IPI00061168	ANKRD40	24.47	24.9658	25.6212	23.6981	24.1073	25.0865	0.611045	0.721703
IPI00167419	ANKRD44	28.644	27.9665	29.0753	28.3768	27.829	28.921	0.154417	0.186317
IPI00329014	ANKRD46	26.1384	26.2187	25.8975	29.6872	25.8277	28.9114	0.804336	-2.05721
IPI00549612	ANKRD49	22.2067	22.2067	23.2823	22.8787	22.7972	23.3339	0.481275	-0.438078
IPI00300452	ANKRD5	24.8405	28.0002	26.1626	25.0118	28.2911	26.2093	0.0436596	-0.169622
IPI00221285	ANKRD50	27.9969	29.3459	28.9335	28.0059	28.6773	28.6178	0.290081	0.325102
IPI00398957	ANKRD52	26.4106	26.0798	23.5447	26.5966	25.818	23.9603	0.0319404	-0.1133
IPI00335437	ANKZF1	24.9625	23.5905	23.4819	23.6839	22.4919	22.4445	0.844686	1.13821
IPI00743594	ANLN	26.0621	26.2378	27.103	26.2868	26.9155	27.565	0.392003	-0.45476
IPI00794169	ANO10	28.1516	28.2787	27.6941	27.4465	27.5413	26.9704	1.34823	0.722076
IPI00917081	ANO6	27.2256	27.7913	26.9407	27.2757	28.0863	27.1101	0.164864	-0.171515
IPI00007423	ANP32B	30.3794	30.586	31.4253	30.9389	31.0235	31.8379	0.474481	-0.469885
IPI00165393	ANP32E	31.9709	31.5931	30.7707	32.1613	31.8627	31.0846	0.208959	-0.257966
IPI00218918	ANXA1	32.6565	32.4412	32.4552	32.5762	32.2765	32.332	0.459105	0.122738
IPI00909703	ANXA11	30.2665	30.2867	30.4059	29.867	29.8074	29.9723	2.59736	0.437447
IPI00418169	ANXA2	35.5352	35.3739	35.3739	35.2258	35.1234	35.2258	1.6836	0.236028
IPI00024095	ANXA3	32.5908	32.534	33.2106	32.4631	32.332	33.0672	0.193007	0.15774
IPI00793199	ANXA4	31.2762	31.5098	31.2762	30.6847	30.8131	30.8536	2.44513	0.570321
IPI00329801	ANXA5	34.0924	34.3511	34.3931	33.1999	33.4741	33.6402	2.21075	0.840822
IPI00221226	ANXA6	32.9559	32.8273	33.0599	31.7074	31.6685	31.8694	3.71495	1.19925
IPI00002460	ANXA7	30.6816	30.1522	29.8343	30.1966	29.5181	29.1784	0.694437	0.591656
IPI00328257	AP1B1	30.7198	30.8751	31.2392	30.3447	30.2698	30.7342	1.10474	0.49516
IPI00643591	AP1G1	30.8009	30.6219	30.6745	30.6855	30.5583	30.6816	0.352508	0.0573203
IPI00027178	AP1G2	27.7362	27.1375	26.7332	27.6876	27.221	26.6551	0.0113661	0.01437
IPI00910088	AP1M1	31.2909	31.1656	31.2165	31.0087	30.8202	30.9231	2.02627	0.307007
IPI00927531	AP1S1	27.2948	27.6713	27.2144	27.1873	27.5351	27.1323	0.224504	0.108615
IPI00304577	AP2A1	31.9512	32.0906	31.9076	31.629	31.892	31.6851	1.19884	0.247812
IPI00914938	AP2A2	31.5642	31.2104	31.0609	31.3701	30.8214	30.8081	0.513788	0.278632
IPI00016621	AP2A2	25.4883	25.8334	23.6255	25.1035	25.6595	24.2087	0.0033155	-0.0081679
IPI00784366	AP2B1	33.1677	32.9812	32.7508	32.8069	32.6606	32.5057	0.973454	0.308833
IPI00022256	AP2M1	32.3077	32.5567	32.3272	31.9282	32.2371	32.0666	1.25234	0.319883
IPI00219840	AP2S1	30.0823	30.2174	29.9322	29.7372	29.8748	29.6556	1.43357	0.321419
IPI00021129	AP3B1	30.658	31.2239	30.658	30.1616	30.646	30.3677	0.902547	0.454835
IPI00719680	AP3D1	30.6847	30.4973	30.8693	30.2698	30.0895	30.5001	1.16644	0.397294
IPI00032459	AP3M1	29.2741	29.1893	28.0672	28.8967	28.8282	27.7616	0.258931	0.348031
IPI00022883	AP3M2	22.9884	21.1465	21.4718	23.1671	22.4837	20.9781	0.147326	-0.340705
IPI00014624	AP3S1	28.6418	28.4829	28.732	28.2669	27.9043	28.1375	1.79604	0.516026
IPI00002150	AP4B1	23.2847	23.5902	24.4018	24.2614	23.7871	25.2746	0.547649	-0.682149
IPI00023630	APAF1	23.6804	21.8943	24.7613	24.5504	22.2569	25.5512	0.202468	-0.674191
IPI00941556	APBB1	24.088	24.624	24.1031	22.4553	23.4625	22.736	1.78719	1.38705
IPI00947448	APBB2	25.9534	27.3027	28.3768	25.4815	26.4557	28.1146	0.194442	0.527023
IPI00012391	APC	19.6024	19.6455	21.4001	19.895	20.1382	21.7838	0.176404	-0.389685
IPI00926648	APEH	28.7277	28.6006	29.2318	27.9733	27.7955	28.3937	1.42039	0.799189
IPI00215911	APEX1	30.7488	30.4931	30.3289	31.2026	30.866	30.6277	0.842544	-0.375194
IPI00855856	API5	31.3079	31.3237	30.9526	31.5213	31.6754	31.1514	0.575038	-0.254632
IPI00911064	APIP	28.5092	28.6988	28.6353	28.2113	28.2584	28.2751	2.46751	0.366142
IPI00217108	APLF	23.2047	22.4592	24.3413	23.4053	23.2868	24.4492	0.224084	-0.378715
IPI00031030	APLP2	27.6153	27.972	27.8332	25.9159	26.3414	26.3223	3.13052	1.61369
IPI00168479	APOA1BP	29.8994	29.6754	30.5213	28.9293	28.7005	29.5601	1.26055	0.968746
IPI00042580	APOO	25.7368	25.2473	24.0294	26.6975	26.4653	23.4073	0.166408	-0.518891
IPI00006608	APP	28.6964	27.3105	28.7472	28.5657	27.4424	28.7305	0.00271478	0.00515747
IPI00007393	APPBP2	21.9283	23.6868	24.2101	21.4914	24.2392	24.1633	0.00661334	-0.0229111
IPI00015836	APPL1	30.1714	29.8827	30.067	30.0612	29.8911	30.2333	0.0571446	-0.0214742
IPI00172513	APPL2	22.3806	23.5263	23.7508	22.9884	23.6215	24.1011	0.262878	-0.351079
IPI00420029	APTX	24.0509	23.8864	24.2614	24.4449	24.2583	24.8202	1.04936	-0.441568
IPI00297572	AQR	27.1812	26.4696	26.8433	27.8282	27.0036	27.3966	0.853983	-0.578079
IPI00333533	AR	23.7331	24.4254	23.3643	22.0096	22.8511	26.5362	0.00970663	0.0419839
IPI00020578	ARAF	26.0544	26.7344	24.2583	24.8102	25.6319	23.41	0.469093	1.065
IPI00828080	ARAP1	25.5048	26.2429	26.2083	26.0352	26.7087	26.1913	0.445254	-0.326399
IPI00298520	ARCN1	32.6103	32.848	32.943	32.7299	32.7706	33.0138	0.101888	-0.0376485
IPI00215914	ARF1	32.3214	32.1571	32.3424	32.1978	32.0377	32.0997	1.01501	0.161925
IPI00215918	ARF4	30.3289	30.7488	30.5029	30.2504	30.5678	30.2802	0.434836	0.160749
IPI00215919	ARF5	29.2333	28.7487	28.6126	29.1638	28.6942	28.5749	0.0725867	0.0539049
IPI00215920	ARF6	30.2174	30.0696	30.3666	29.9537	29.9342	30.1396	0.902758	0.208722
IPI00217354	ARFGAP1	28.8355	29.1016	28.1821	29.4921	29.5886	28.8067	0.7347	-0.58939
IPI00297322	ARFGAP2	28.2836	28.341	28.1082	28.5266	28.6483	28.3796	1.23026	-0.273915
IPI00299263	ARFGAP3	22.4327	22.6477	21.6057	21.8884	22.1802	20.827	0.502198	0.596895
IPI00002188	ARFGEF1	26.5341	27.9421	27.841	26.8328	27.4786	27.2846	0.186569	0.240399
IPI00002186	ARFGEF2	30.2626	30.3097	29.9931	29.8448	29.9328	29.4304	1.15871	0.452496
IPI00021258	ARFIP1	28.2032	28.4936	28.497	27.9207	28.0338	27.9249	1.86544	0.438148
IPI00021257	ARFIP2	27.287	28.3671	27.9093	27.0275	27.3681	27.4368	0.788805	0.576994
IPI00015178	ARFRP1	25.8053	25.5429	25.4708	26.211	25.9483	25.4647	0.484149	-0.268332
IPI00478834	ARGLU1	25.0063	26.5302	27.6732	24.6015	26.3467	27.5598	0.0708928	0.23391
IPI00020567	ARHGAP1	30.9871	31.4485	30.8648	31.5308	31.942	31.543	1.20377	-0.571774
IPI00328279	ARHGAP12	25.9925	26.9562	20.9548	24.0921	26.1591	21.6416	0.106366	0.670256
IPI00064767	ARHGAP17	27.1432	27.9474	27.2416	26.9085	27.7166	26.993	0.26354	0.238035
IPI00296353	ARHGAP18	25.2573	26.195	26.6532	24.639	25.557	26.0089	0.477911	0.633567
IPI00169307	ARHGAP21	23.4286	20.7165	24.2903	23.7139	21.4414	24.2851	0.0858816	-0.334977
IPI00101969	ARHGAP23	27.5007	26.9304	26.8636	27.1971	27.1645	27.0625	0.073394	-0.0431353
IPI00830067	ARHGAP30	24.0762	23.9141	25.1557	23.5931	23.4819	24.6408	0.371987	0.476745
IPI00646885	ARHGAP5	29.6033	29.8772	29.9814	29.1513	29.6838	29.8257	0.497837	0.267049
IPI00793722	ARHGAP9	23.8681	24.3773	24.3725	24.0748	24.5504	24.5353	0.322724	-0.180854
IPI00794402	ARHGDIA	33.3697	33.0966	33.5216	33.3697	32.9999	33.3184	0.230844	0.0999807
IPI00003817	ARHGDIB	29.2597	28.9621	26.8902	29.4189	29.2463	27.0648	0.067674	-0.20604
IPI00395605	ARHGEF1	29.5373	29.8425	29.5573	29.532	29.6465	29.5078	0.31861	0.0835781
IPI00413517	ARHGEF10	25.1401	25.7105	20.4058	25.2386	25.5032	20.6589	0.00686113	-0.0481148
IPI00513819	ARHGEF10L	26.3161	26.8203	26.4808	26.5102	26.8398	26.5419	0.193078	-0.0915356
IPI00377085	ARHGEF11	27.6518	27.934	28.159	27.1671	27.5559	27.8028	0.794813	0.406335
IPI00022164	ARHGEF12	28.0608	28.3381	28.1122	27.4337	27.3061	27.4554	2.86851	0.771938
IPI00472160	ARHGEF2	29.5539	29.2443	29.6465	30.1928	30.0696	30.3794	2.07565	-0.732355
IPI00014256	ARHGEF6	26.9029	26.3642	28.0984	27.2684	26.6168	28.2873	0.141057	-0.269006
IPI00900260	ARHGEF7	28.9418	29.0932	28.515	28.7748	29.1124	28.3481	0.138094	0.104935
IPI00643722	ARID1A	30.9767	31.0432	29.748	31.2529	31.3506	30.1594	0.228514	-0.33168
IPI00396577	ARID1B	27.4648	27.6563	28.0699	28.0317	28.2739	28.4462	1.13653	-0.520257
IPI00470537	ARID2	20.6233	21.6606	20.8722	22.2903	22.7898	21.9416	1.49865	-1.28854
IPI00296069	ARID4A	22.374	22.3296	23.5727	23.0446	22.9432	24.1063	0.476827	-0.60595
IPI00294943	ARIH1	31.1957	31.0792	31.2928	31.0846	31.0126	31.2026	0.465789	0.0893313
IPI00007304	ARIH2	27.9421	27.4042	27.4573	29.1678	27.8581	27.5178	0.473294	-0.580045
IPI00219518	ARL1	28.6668	28.4866	27.7002	28.481	28.1865	27.4592	0.222737	0.242284
IPI00005163	ARL15	25.1253	24.7197	24.6353	24.7613	24.4766	24.088	0.712064	0.384825
IPI00003326	ARL2	27.9293	28.1413	27.2319	27.8663	28.2836	27.0075	0.0351923	0.0484066
IPI00003327	ARL3	30.3519	30.2554	29.5414	29.7708	29.6556	28.9998	0.752179	0.57416
IPI00021685	ARL6	27.2956	27.5722	27.3357	27.2731	27.3563	27.3176	0.404675	0.0855071
IPI00014232	ARL6IP1	24.9785	24.7655	26.5785	25.3487	25.1729	28.148	0.280998	-0.782345
IPI00007426	ARL6IP5	28.1732	28.4629	28.6253	27.586	28.094	27.7709	1.41394	0.603507
IPI00060031	ARL8A	31.557	31.2313	31.1271	30.6601	30.3079	30.2919	2.12875	0.885182
IPI00018871	ARL8B	27.5264	26.7581	26.3951	26.9969	25.9073	25.685	0.593387	0.696795
IPI00018260	ARMC1	29.1678	28.515	28.1715	28.7239	27.9816	27.8095	0.478453	0.44642
IPI00020196	ARMC6	26.3845	25.6694	26.4182	27.1748	26.4958	27.7013	1.06675	-0.966623
IPI00795553	ARMC8	28.6166	28.3339	28.6021	29.0107	28.8014	28.9886	1.66919	-0.41603
IPI00829927	ARMC9	22.997	22.1802	24.1344	22.9139	21.5418	23.99	0.115607	0.288627
IPI00006142	ARMCX2	22.5533	21.7399	23.7331	21.1573	20.2397	22.6105	0.675471	1.33962
IPI00009906	ARMCX3	24.5055	25.9661	25.2317	23.8966	25.1205	24.6078	0.55739	0.692839
IPI00514749	ARNT	22.2789	22.2528	23.4877	22.5969	22.54	23.6768	0.183428	-0.264756
IPI00333068	ARPC1A	26.0118	25.7368	26.2731	25.6624	25.5057	26.2227	0.323214	0.2103
IPI00005160	ARPC1B	31.9551	32.097	32.4796	32.0323	32.148	32.5241	0.0953617	-0.0575593
IPI00005161	ARPC2	32.438	32.5241	32.7354	32.359	32.6071	32.6861	0.0387892	0.0151189
IPI00005162	ARPC3	31.0148	31.38	30.474	31.0452	31.2392	30.424	0.0509881	0.0534369
IPI00925052	ARPC4;TTLL3	30.3226	29.9591	29.2574	30.3289	30.0465	29.3435	0.0479313	-0.0599359
IPI00550234	ARPC5	29.6599	29.3863	29.4846	29.4455	29.2993	29.3476	0.737735	0.14614
IPI00414554	ARPC5L	28.5547	27.7955	28.5988	28.9683	28.1843	28.8521	0.419755	-0.351917
IPI00792984	ARPP19	29.381	29.3854	29.9084	29.2022	29.0392	29.6481	0.445546	0.261779
IPI00336017	ARRB1	29.0107	28.8006	29.7834	28.2883	27.6921	28.8346	0.975394	0.926543
IPI00786904	ARRB2	27.308	28.0984	28.6418	26.9407	27.7902	28.3868	0.210541	0.310166
IPI00329685	ARSA	26.1747	25.7279	26.7176	25.4145	23.8508	25.9619	0.74809	1.13102
IPI00010490	ARVCF	21.2423	22.54	23.1566	19.8304	21.4691	21.7794	0.710625	1.28667
IPI00307524	AS3MT	24.7547	25.8955	26.3653	24.7088	26.3632	26.6422	0.109384	-0.232893
IPI00418446	ASAH1	25.551	25.151	25.2128	24.9457	24.1774	23.83	1.31246	0.987218
IPI00376976	ASAP1	28.8397	28.9114	29.2177	28.2595	28.2946	28.6427	1.60602	0.590653
IPI00022058	ASAP2	25.2683	26.0051	25.4333	25.2785	26.0785	26.3845	0.361256	-0.344911
IPI00016560	ASB6	20.3106	20.3923	22.0673	21.9134	21.932	23.1934	0.934191	-1.42292
IPI00434389	ASCC1	23.6899	23.9692	21.6606	22.6373	23.8717	21.1387	0.199822	0.557334
IPI00549736	ASCC2	25.005	25.3503	23.6597	24.7321	24.289	23.1566	0.367255	0.612418
IPI00430472	ASCC3	28.8891	28.7618	29.1553	28.3902	28.7487	28.7205	0.90142	0.315658
IPI00292168	ASF1A	28.3521	28.3654	22.7972	27.6504	27.8401	22.4863	0.0702837	0.512687
IPI00328658	ASH2L	26.672	27.14	26.3037	27.7116	27.6642	27.2161	1.33655	-0.8254
IPI00220267	ASL	30.2227	29.8528	28.9144	29.3776	29.195	28.1238	0.62311	0.764531
IPI00013466	ASNA1	30.8931	31.1219	30.0895	30.9767	31.1656	30.1271	0.0418434	-0.0549418
IPI00554777	ASNS	32.1073	32.1354	32.1276	32.6683	32.7748	32.6496	3.86881	-0.574162
IPI00294834	ASPH	30.9339	30.9696	30.586	30.7908	30.7402	30.49	0.435376	0.156191
IPI00065276	ASPSCR1	28.1752	28.1309	28.1865	28.5111	28.5619	28.6718	2.93609	-0.417394
IPI00020632	ASS1	33.2902	33.3333	33.5963	33.0672	33.127	33.2391	1.14022	0.262131
IPI00217537	ASXL1	22.0887	22.7737	23.3827	22.6682	23.8937	23.9172	0.598678	-0.744653
IPI00171445	ATAD1	30.278	30.271	30.7488	30.0377	30.0212	30.2184	0.934051	0.340138
IPI00170548	ATAD2	26.0147	26.5663	26.2291	26.1879	26.8433	26.4653	0.387562	-0.228801
IPI00739581	ATAD2B	23.6585	22.6449	21.7676	24.0325	23.1415	22.9067	0.446539	-0.669911
IPI00295992	ATAD3A	29.9964	30.3592	30.0932	30.19	30.5703	30.2473	0.507856	-0.186239
IPI00234446	ATF2	25.4272	25.7862	25.1729	24.7403	25.3383	24.8311	0.891329	0.492222
IPI00004084	ATF6B	19.5256	19.5553	21.3589	18.1768	18.3865	20.0977	0.664788	1.25957
IPI00015147	ATF7	28.4317	27.1481	28.6331	28.0651	27.3249	28.7953	0.00479765	0.00922394
IPI00795654	ATF7IP	23.7457	22.5559	23.7185	24.7345	24.5114	24.7627	1.53319	-1.32951
IPI00470446	ATG16L1	26.1567	25.8601	27.0466	26.6342	26.6108	27.2051	0.49691	-0.462228
IPI00878288	ATG2A	24.3773	24.2392	25.4847	23.6804	23.555	24.7088	0.598562	0.719011
IPI00152990	ATG2B	25.7874	26.5043	26.5272	26.2213	27.4862	26.6369	0.499733	-0.508483
IPI00022254	ATG3	28.3071	28.3016	27.7784	28.048	28.1669	27.738	0.266588	0.144744
IPI00787501	ATG4B	26.8735	26.4392	25.6319	28.467	26.7338	28.7249	1.07912	-1.66037
IPI00006800	ATG5	27.6498	27.6593	27.9548	27.7784	27.9421	28.0644	0.597984	-0.173658
IPI00007404	ATG7	27.8817	29.2846	27.1971	28.0956	28.6374	26.4825	0.161045	0.382619
IPI00383396	ATG9A	19.2961	24.0168	21.1743	19.2961	23.5278	21.1545	0.0310668	0.169588
IPI00289499	ATIC	31.656	31.8778	31.7608	32.3723	32.5567	32.4232	2.90336	-0.685897
IPI00103530	ATL1	25.2908	24.0921	19.441	23.7233	22.8482	19.8304	0.139683	0.807323
IPI00169267	ATL2	29.6481	30.0069	29.2993	29.8368	29.9964	28.7971	0.0898175	0.108005
IPI00845461	ATL3	29.9537	30.0297	30.3822	29.9789	29.917	30.3267	0.0926534	0.0476678
IPI00005502	ATN1	23.8937	23.9215	21.0627	24.0066	25.2669	21.4132	0.152228	-0.602931
IPI00240793	ATP11B	24.1421	25.2556	23.4802	23.8333	24.7044	22.2206	0.324976	0.706521
IPI00396234	ATP11C	23.0429	20.6589	24.1703	24.0053	20.6431	25.0235	0.13131	-0.599947
IPI00008161	ATP12A	28.6331	28.4357	29.1195	28.0608	27.8663	28.763	0.666467	0.499397
IPI00034277	ATP13A1	29.8802	29.974	29.5493	29.994	30.0159	29.4531	0.029666	-0.0198097
IPI00006482	ATP1A1	33.809	33.5577	33.8486	33.3751	33.1677	33.4076	1.63158	0.421644
IPI00003021	ATP1A2	31.0452	30.5803	29.8003	31.3489	30.881	30.0932	0.226835	-0.299096
IPI00788782	ATP1A3	23.7017	23.5751	24.7767	23.8089	23.6747	24.8351	0.0578195	-0.0883973
IPI00747849	ATP1B1	25.8375	25.9868	23.3132	25.873	20.9225	20.0052	0.618732	2.77894
IPI00008167	ATP1B3	27.9452	28.0129	27.8076	27.7902	29.9651	28.0032	0.405383	-0.664281
IPI00219078	ATP2A2	32.3258	32.3693	32.4631	32.4983	32.7079	32.6547	1.4539	-0.234252
IPI00021695	ATP2B1	31.4389	31.3301	31.1722	31.2083	31.0804	31.0254	1.03866	0.209014
IPI00921961	ATP2C1	25.8551	24.3341	24.0998	25.3258	23.7484	24.0431	0.205956	0.390559
IPI00218919	ATP4A	23.8483	23.7139	24.9457	24.5807	24.4314	25.5842	0.583434	-0.696142
IPI00440493	ATP5A1	35.9252	36.0018	35.5025	35.5025	35.6118	35.0656	0.848761	0.416494
IPI00303476	ATP5B	36.456	36.0586	35.9555	35.9252	35.6851	35.5622	1.09265	0.432547
IPI00478410	ATP5C1	32.8902	32.4769	32.534	32.3026	31.9282	31.9875	1.49376	0.560893
IPI00024920	ATP5D	31.3679	31.0217	31.0746	30.881	30.5319	30.6146	1.47434	0.478874
IPI00176527	ATP5EP2	29.869	29.9537	30.0494	29.2737	29.3102	29.5243	2.4783	0.587952
IPI00029133	ATP5F1	31.0217	30.7381	31.1441	30.3996	30.2011	30.5653	1.6525	0.579302
IPI00792135	ATP5H	31.8494	31.7902	31.8284	31.2239	31.0645	31.2365	3.43676	0.647677
IPI00220487	ATP5H	29.6124	28.9711	28.4011	29.0591	28.3103	27.7663	0.529236	0.616272
IPI00218848	ATP5I	27.0753	27.0445	26.7011	26.6219	26.9265	26.3811	0.681529	0.297148
IPI00007611	ATP5O	31.56	31.8225	30.9951	31.0045	31.2298	30.5839	0.775478	0.519828
IPI00301428	ATP5SL	24.2603	24.0957	24.1481	24.9907	24.8451	25.7473	1.64908	-1.02632
IPI00784119	ATP6AP1	26.2131	25.0143	24.7692	25.6517	24.7872	24.8986	0.15766	0.21972
IPI00168884	ATP6AP2	27.0506	26.9265	24.5353	26.8676	26.215	23.7064	0.171912	0.574489
IPI00892784	ATP6V0A1	30.8131	30.2894	30.7015	29.5654	28.959	29.4869	2.15391	1.26427
IPI00000425	ATP6V0A2	26.1925	25.677	25.4405	26.0203	25.5108	25.3391	0.185342	0.1466
IPI00034159	ATP6V0D1	29.7119	29.3911	29.5858	28.5012	28.4394	28.6126	3.22352	1.04517
IPI00167639	ATP6V0D2	23.3145	23.4149	20.4142	21.4239	22.6813	18.7081	0.398974	1.44343
IPI00007682	ATP6V1A	33.0833	32.9654	31.9967	31.919	31.8494	31.0695	1.14557	1.06916
IPI00007812	ATP6V1B2	32.2626	32.0719	32.1468	31.286	31.0947	31.2058	3.60084	0.964947
IPI00007814	ATP6V1C1	31.4684	31.0452	31.7136	30.7198	30.3961	31.3301	0.817462	0.593717
IPI00001568	ATP6V1D	28.8465	28.6595	28.5182	28.3683	27.3349	27.5083	1.31693	0.937555
IPI00003856	ATP6V1E1	31.4485	30.8782	29.9269	31.1872	29.7754	28.9128	0.4241	0.792728
IPI00946714	ATP6V1F	28.765	29.1732	29.8778	28.1348	28.8876	29.1766	0.527735	0.539005
IPI00945089	ATP6V1G2	28.5355	27.9488	26.9677	27.6384	27.1136	26.2242	0.599591	0.82527
IPI00296191	ATP6V1H	30.841	30.8177	30.9575	29.8932	29.8448	29.9304	4.40811	0.982625
IPI00215615	ATP7A	23.5123	24.977	22.3192	23.242	24.1136	22.0343	0.184672	0.472869
IPI00396022	ATP9B	25.5129	26.2004	24.4642	25.3357	25.6632	24.1063	0.198655	0.357437
IPI00302673	ATPAF1	24.9355	22.583	23.0516	24.6353	22.5923	22.9164	0.0509139	0.142022
IPI00296999	ATPAF2	26.6714	26.9348	27.6593	26.3354	26.592	27.3153	0.338435	0.340979
IPI00063121	ATPBD4	26.5043	27.371	26.5531	26.3842	27.1899	26.3322	0.166008	0.17405
IPI00412298	ATR	22.0615	22.7524	21.9454	23.3909	24.0535	21.862	0.538253	-0.849003
IPI00297633	ATRX	29.265	28.2584	24.9019	27.221	27.4042	25.0568	0.236798	0.914408
IPI00940340	ATX	28.023	28.4317	28.3174	28.9694	29.4041	29.4041	2.21375	-1.00183
IPI00903319	ATXN1	22.0151	22.0615	23.3011	23.5161	23.4229	24.5641	1.15914	-1.37509
IPI00719520	ATXN2	29.4964	29.289	30.2643	29.5717	29.3863	30.2071	0.033597	-0.0384897
IPI00642402	ATXN2L	30.4357	30.4546	30.3907	30.9293	30.9871	30.8991	4.04758	-0.511499
IPI00017802	AUH	27.2506	28.3123	28.3061	25.314	27.5244	27.1645	0.770429	1.28871
IPI00910371	AUP1	26.2763	26.5419	23.1148	25.8492	25.4815	22.6373	0.164717	0.654994
IPI00006904	AVEN	20.8134	20.7982	20.4543	22.471	21.9812	21.8331	2.47201	-1.4065
IPI00289330	AVIL	28.857	28.2565	27.6946	30.0465	29.5776	29.7684	1.87022	-1.52811
IPI00871617	B	29.2382	28.9804	29.1124	28.6677	29.2259	29.0431	0.295295	0.131407
IPI00375600	B3GALTL	25.922	25.0235	25.0179	25.5615	24.8593	24.804	0.252496	0.246232
IPI00477470	B3GAT3	25.6147	26.2068	25.9135	24.3144	24.7422	24.5902	2.52193	1.36272
IPI00009997	B3GNT1	24.0815	26.8567	26.8735	24.9808	25.9824	26.3477	0.0568999	0.166934
IPI00257239	B3GNT2;B3GNT1	22.6105	22.5891	23.7871	22.113	22.1558	23.3548	0.329449	0.454403
IPI00215767	B4GALT1	20.6896	25.6624	20.4387	21.101	25.9883	20.4543	0.0348125	-0.250975
IPI00011656	B4GALT5	26.4276	26.2843	25.7787	25.1391	24.8908	24.7502	2.2566	1.23686
IPI00000643	BAG2	27.4631	27.5746	25.134	27.2888	27.5191	25.0345	0.0329998	0.109779
IPI00641582	BAG3	29.8425	29.9342	29.9098	30.2094	30.2125	30.2554	3.34773	-0.330268
IPI00639961	BAG3	29.263	28.751	29.8043	29.3854	28.8755	29.8958	0.0952667	-0.11282
IPI00556027	BAG5	27.0588	26.9512	25.9781	27.1246	26.7071	25.8103	0.0784757	0.115379
IPI00299088	BAIAP2	28.662	28.7166	28.7142	28.8465	29.0252	28.8381	1.49798	-0.20567
IPI00026087	BANF1	30.1469	30.0108	28.7447	30.6445	30.386	29.3881	0.357861	-0.505431
IPI00167773	BANP	24.8663	24.6659	25.8601	23.3524	23.2669	24.4008	1.31533	1.45739
IPI00465087	BAP1	27.4008	27.9761	23.4053	22.538	23.8233	23.763	0.899134	2.88597
IPI00641829	BAT1	33.8374	33.6402	33.809	33.9333	33.7582	34.0003	0.643063	-0.135075
IPI00741537	BAT2L1	21.4066	21.3589	20.1382	23.1857	22.9309	20.7165	0.66983	-1.30979
IPI00739117	BAT2L2	29.8958	28.964	30.0612	29.8994	29.2493	30.124	0.0975352	-0.117266
IPI00645431	BAT3	30.9951	30.8713	30.6502	31.0695	30.8991	30.7919	0.249182	-0.0813224
IPI00791049	BAT5	28.0624	27.9194	27.4759	28.4308	28.3428	27.9508	0.85273	-0.422231
IPI00444945	BAX	28.6733	27.466	28.2157	28.048	27.3652	27.7853	0.404197	0.385462
IPI00412415	BAZ1A	27.2914	26.5441	26.5707	28.2137	27.2636	27.5034	1.07313	-0.858161
IPI00069817	BAZ1B	28.6483	29.0918	28.7389	29.5181	29.9521	29.5798	1.95714	-0.856969
IPI00300222	BBX	22.8115	22.8149	23.9763	23.0302	22.9376	24.0921	0.102206	-0.152425
IPI00642984	BCAP31	31.0267	31.2818	31.2239	30.5803	30.7854	30.8442	1.77955	0.440765
IPI00954861	BCAR1	25.9661	26.002	24.9074	25.6272	25.6447	24.9544	0.195633	0.216425
IPI00025178	BCAS2	29.5601	29.2338	29.3336	29.7674	29.3892	29.2541	0.200522	-0.0944341
IPI00382412	BCAT1	28.3827	29.3738	29.1016	29.4973	30.7047	30.4321	1.25657	-1.2587
IPI00788925	BCAT2	27.5876	26.5884	26.2483	27.253	25.7226	25.7397	0.368071	0.569678
IPI00002203	BCCIP	24.3291	24.2347	23.0933	25.7291	25.4333	24.5665	1.20667	-1.35723
IPI00444329	BCKDHA	29.7719	29.7545	29.5698	28.4286	28.4904	28.3428	4.10072	1.27812
IPI00011276	BCKDHB	27.6965	27.4323	26.4572	26.5419	26.0632	25.3689	1.11474	1.20402
IPI00298612	BCKDK	24.1774	24.0016	26.2795	23.3694	23.2947	25.4405	0.316419	0.7846
IPI00022477	BCL10	22.113	22.1273	23.3423	22.7115	22.6526	23.7811	0.402519	-0.520871
IPI00020961	BCL2	21.5446	23.099	22.8806	19.6455	22.306	21.5869	0.644198	1.32858
IPI00019983	BCL2L1	26.5686	24.3231	23.8483	25.9029	23.821	23.1671	0.202013	0.616351
IPI00011635	BCL2L13	23.4273	22.994	23.4249	23.0429	22.3105	22.9679	0.863912	0.508254
IPI00328798	BCL9L	24.8351	24.638	25.8343	24.6336	24.4939	25.6646	0.11975	0.171764
IPI00006079	BCLAF1	29.4666	30.1594	30.0999	29.6894	30.3656	30.2793	0.263504	-0.202774
IPI00003985	BCS1L	26.0925	26.2444	25.0627	25.9661	26.1384	25.0369	0.0590191	0.086038
IPI00748342	BECN1	23.1276	25.237	23.8755	23.4653	24.6934	24.1896	0.0167839	-0.0360546
IPI00010853	BEGAIN	30.0131	29.7532	29.9681	30.7304	30.6934	30.8511	3.08827	-0.846832
IPI00924549	BET1	27.8231	27.2284	26.1559	27.2051	26.7593	25.6554	0.323871	0.529189
IPI00010790	BGN	28.8812	28.932	28.7431	27.9953	28.0544	28.2883	2.6567	0.739407
IPI00018368	BICD1	27.1152	27.5482	27.6642	27.3844	27.4607	27.7596	0.172576	-0.092343
IPI00337667	BICD2	30.067	30.841	31.0103	30.1786	30.6301	30.7551	0.127867	0.1182
IPI00186966	BIN1	29.1638	28.6113	29.0186	29.6672	29.265	29.6992	1.32473	-0.612621
IPI00299635	BIRC6	29.2296	29.1569	29.7445	29.2541	29.0486	29.287	0.380065	0.180391
IPI00219575	BLMH	29.7019	30.5949	29.7041	29.7834	30.5029	29.7177	0.000897013	-0.00107129
IPI00020319	BLOC1S1	26.8217	26.406	25.417	25.9883	25.6868	24.9036	0.582368	0.688652
IPI00411983	BLOC1S2	23.5293	25.9025	24.6193	23.7457	25.6932	24.7528	0.0175449	-0.0468464
IPI00397721	BLOC1S3	25.2522	23.2847	26.1076	25.1755	23.8574	25.5225	0.0100085	0.0297006
IPI00294158	BLVRA	26.854	26.7011	26.5138	26.3632	26.1945	26.2429	1.72923	0.42274
IPI00219910	BLVRB	30.4851	30.0911	30.0108	29.6516	29.3435	28.9266	1.5913	0.888359
IPI00017299	BMI1	27.3563	27.0612	26.7087	27.643	27.5912	27.2989	1.02064	-0.468972
IPI00337426	BMP2K	27.3618	27.7616	27.0612	26.8821	27.3474	26.4785	0.694684	0.492188
IPI00006099	BMS1	27.0297	27.1456	27.6072	27.7928	27.8974	28.1793	1.52392	-0.695675
IPI00030397	BNIP1	28.4286	29.0823	28.2946	28.4592	29.2109	28.1732	0.010524	-0.0125688
IPI00030399	BNIP2	22.2528	23.9311	23.9141	21.0955	23.7651	23.6569	0.195513	0.526792
IPI00028419	BNIP3L	28.723	28.2844	28.5201	27.9057	27.5598	27.2914	1.87363	0.923517
IPI00063667	BOD1	27.4825	27.2051	26.4696	27.1382	27.2331	26.6766	0.0354602	0.0364265
IPI00301434	BOLA2B;BOLA2	29.2541	29.0241	29.4102	29.0805	28.7431	29.2338	0.501695	0.210342
IPI00412229	BOLA3	26.8676	25.9619	27.4124	27.0191	26.2562	27.482	0.112452	-0.171794
IPI00028955	BOP1	25.0143	24.8511	23.1876	25.2971	24.9948	23.7017	0.153864	-0.313523
IPI00384428	BPHL	26.4633	26.3058	27.4115	25.1931	25.0291	26.2213	1.15236	1.2457
IPI00410215	BPNT1	27.0708	27.5444	27.4228	27.3339	27.9379	27.8807	0.709052	-0.371487
IPI00785110	BPTF	25.6646	26.0845	25.126	26.0925	26.3354	25.9203	0.745349	-0.491044
IPI00396089	BRAP	26.1879	25.9073	26.5441	26.3642	26.0265	26.3614	0.0603855	-0.0375671
IPI00440502	BRD2	29.8343	30.2449	29.6124	28.9353	29.3376	28.5657	1.51606	0.951015
IPI00014266	BRD3	28.4228	28.2595	29.2003	27.7616	27.6538	28.3896	0.871171	0.692506
IPI00440727	BRD4	29.2961	29.4304	28.9236	28.8812	29.4973	28.4621	0.329872	0.269784
IPI00647008	BRD7	23.552	25.2238	24.8931	24.6	25.8866	25.7886	0.590256	-0.86875
IPI00019226	BRD8	23.1671	23.9763	23.4286	24.1201	24.7587	24.8639	1.47222	-1.05694
IPI00164724	BRE	29.3863	28.8833	29.131	29.1821	28.8776	28.9225	0.331191	0.13949
IPI00181728	BRIX1	27.4759	26.9061	26.5811	28.6812	28.2113	27.8997	1.67551	-1.27638
IPI00031653	BRMS1L	24.2362	20.6896	22.6842	24.7642	21.3589	23.1052	0.140518	-0.539464
IPI00022832	BRP44	24.9794	25.8988	25.314	23.7568	25.2848	24.4562	0.80325	0.898136
IPI00412785	BRP44L	24.5154	24.6824	21.2753	23.7388	23.8864	20.6431	0.182761	0.734961
IPI00456620	BRPF1	22.6449	22.6146	25.5801	23.814	23.6768	25.5492	0.252268	-0.733436
IPI00289944	BRWD1	19.7157	19.7647	21.4547	21.0445	21.1743	22.4888	0.790209	-1.25749
IPI00456887	BSCL	31.5542	31.3136	31.3551	31.4915	31.2985	31.5962	0.180871	-0.0544345
IPI00018026	BSDC1	25.6117	22.4082	25.844	25.56	23.0654	25.7836	0.0439769	-0.181665
IPI00024802	BTAF1	28.7889	29.5373	29.7726	28.6879	28.9128	28.9065	0.802409	0.53051
IPI00396190	BTBD9	21.9748	20.5021	22.113	22.0817	19.8113	22.8258	0.0136299	-0.0429789
IPI00221035	BTF3	31.5175	31.2985	30.9047	32.0697	31.8225	31.4421	0.985541	-0.537886
IPI00412792	BTF3L4	31.1303	29.9688	30.9326	30.6219	29.6443	30.4591	0.391549	0.435446
IPI00413142	BTRC	22.3192	22.058	20.8056	21.5936	21.4823	20.9987	0.299097	0.369435
IPI00921844	BUB1B	21.9541	22.0096	23.2391	22.0198	22.0379	23.2638	0.0224871	-0.0395775
IPI00013468	BUB3	31.6596	31.4377	31.7361	31.9512	31.8736	32.1073	1.50144	-0.366213
IPI00013180	BUD31	27.9612	28.0716	28.0914	28.7621	28.7732	28.7277	4.12032	-0.712921
IPI00328987	BYSL	28.1895	27.9093	28.1998	29.2291	29.1766	29.3459	3.36519	-1.15102
IPI00916503	BZW1	31.1762	31.2269	31.4064	31.3171	31.2762	31.5642	0.436588	-0.115997
IPI00022305	BZW2	30.9643	31.0846	31.2512	31.6914	31.7564	31.9015	2.55909	-0.683115
IPI00419273	C	28.9601	28.892	28.6792	29.3605	29.3043	29.0403	1.40299	-0.391314
IPI00895806	C	31.6665	31.8881	32.3663	32.1898	32.3827	32.8238	0.816006	-0.491779
IPI00019966	C	24.7767	24.8607	24.5271	24.7655	25.0721	24.8251	0.533156	-0.166084
IPI00060893	C10orf104	22.4553	22.6842	21.2639	23.153	23.332	22.4133	0.729042	-0.831598
IPI00947080	C10orf118	25.74	25.4637	26.0632	24.8311	24.9036	25.2733	1.56812	0.752961
IPI00478758	C10orf119	27.7865	27.8997	28.4228	28.9886	28.996	29.5414	1.87996	-1.139
IPI00429177	C10orf4	22.3918	25.0312	24.1896	22.5593	24.8134	24.2362	0.000395475	0.00125122
IPI00410319	C10orf46	22.0492	24.7698	22.0547	22.4369	24.4614	22.025	0.00460362	-0.0165621
IPI00646323	C10orf76	25.3409	24.557	24.3386	25.8091	25.0709	24.524	0.333714	-0.38916
IPI00001710	C11orf2	28.9225	29.2741	29.481	28.4342	28.8833	28.8967	1.0276	0.487785
IPI00152627	C11orf30	24.213	24.1877	24.3789	24.6272	24.5817	25.2703	1.15695	-0.566535
IPI00003419	C11orf58	27.3442	27.1406	28.3071	27.4131	27.134	28.2763	0.00691841	-0.0104866
IPI00016670	C11orf59	29.9322	29.5539	29.1924	29.5886	29.0718	29.0516	0.510296	0.322153
IPI00016335	C11orf60	19.0845	19.2139	21.1117	19.5256	19.6455	21.3705	0.159784	-0.377148
IPI00439946	C11orf61	21.2896	21.4066	22.7524	22.7627	22.7063	23.821	1.01333	-1.28044
IPI00100775	C11orf67	26.4928	25.6606	26.5798	25.5156	25.1869	26.2664	0.60839	0.588088
IPI00914048	C11orf68	27.0472	26.8735	27.1204	27.1716	26.8997	27.2354	0.282333	-0.0885181
IPI00410091	C11orf73	27.1481	27.5943	27.308	26.6596	27.0206	26.6956	1.48732	0.558207
IPI00016925	C12o	28.0672	28.3428	27.2552	27.9249	27.9877	26.9341	0.225919	0.27282
IPI00029444	C12orf10	30.2504	30.188	29.7553	30.6034	30.5243	30.1574	0.810658	-0.363766
IPI00550986	C12orf11	26.7972	26.8172	27.3689	26.8469	27.0744	27.7481	0.279542	-0.228697
IPI00184546	C12orf23	29.7664	29.6056	29.0718	30.0297	29.8528	29.2768	0.315313	-0.238489
IPI00795287	C12orf29	26.2795	27.3681	28.6149	27.1466	27.903	29.3765	0.313567	-0.721226
IPI00006906	C12orf4	21.6309	23.8799	22.9821	22.2185	23.7457	23.434	0.139048	-0.301781
IPI00791778	C12orf41	24.3083	25.2716	25.7862	25.3838	25.8355	26.7961	0.666412	-0.883081
IPI00305296	C12orf44	22.8482	22.0151	20.7982	21.9353	20.5518	20.3319	0.536857	0.947481
IPI00869000	C12orf51	28.5441	23.0009	27.6093	27.8581	22.1744	27.0445	0.100808	0.692436
IPI00797825	C12orf66	24.2254	24.4673	25.4647	24.0815	24.2937	25.3088	0.106179	0.157792
IPI00411705	C13orf1	27.3474	27.0693	28.5636	26.9677	27.1299	28.4592	0.0753224	0.141161
IPI00456981	C13orf37	23.4946	23.9082	22.8653	24.0419	23.7508	22.9852	0.144222	-0.169896
IPI00062050	C14orf126	28.1849	28.3993	27.3474	26.9621	26.8276	26.5198	1.59745	1.20738
IPI00941851	C14orf133	26.0158	26.0089	24.3838	26.0937	25.2733	24.3898	0.107018	0.217231
IPI00852898	C14orf138	25.3487	26.2947	27.1614	26.5138	27.3027	28.1195	0.678205	-1.04373
IPI00009922	C14orf156	29.4989	29.8617	30.9181	29.3174	29.5989	30.8609	0.0935943	0.167147
IPI00411520	C14orf159	27.6189	27.3853	26.7441	27.3486	27.1603	26.6917	0.217694	0.182567
IPI00006980	C14orf166	30.1334	30.2684	29.271	30.3538	30.5175	29.4434	0.177659	-0.213985
IPI00216999	C14orf21	25.5945	25.5272	25.7631	26.3312	26.7758	26.4442	2.38313	-0.888798
IPI00019205	C14orf4	29.432	29.4143	28.5817	29.4781	29.4762	28.5877	0.0313807	-0.0380058
IPI00394994	C14orf49	24.7088	24.6168	24.9366	25.5345	25.2522	25.4742	2.18654	-0.666211
IPI00020777	C14orf57	25.1003	24.8941	26.1133	24.8351	24.7112	25.891	0.157666	0.223466
IPI00294680	C15orf23	25.246	25.0627	25.8303	25.5272	25.3398	24.3358	0.289015	0.312052
IPI00024551	C15orf24	29.1856	28.7005	28.2209	28.7849	28.1732	27.6489	0.508582	0.499986
IPI00915991	C15orf38	26.8979	26.7408	27.1927	27.0348	26.9512	29.0977	0.452714	-0.750743
IPI00306017	C15orf44	25.9977	25.7696	25.7923	26.4785	25.9841	25.945	0.69037	-0.282658
IPI00335001	C15orf63;SERF2	27.2902	27.2856	26.0057	27.6357	27.7697	26.6014	0.349149	-0.475083
IPI00745105	C16orf13	25.3042	26.1879	26.3103	23.711	24.213	24.7345	1.77682	1.71465
IPI00015782	C16orf35	26.9172	27.8527	21.9244	27.359	28.467	21.2988	0.0164744	-0.143482
IPI00011693	C16orf42	20.3575	20.4387	22.1046	20.8134	20.9548	22.3345	0.207174	-0.400647
IPI00024619	C16orf61	26.5908	26.484	21.2988	26.4808	26.1657	21.3705	0.0163905	0.118825
IPI00465238	C16orf62	28.4308	28.1362	28.4866	28.4103	27.8671	28.8266	0.018766	-0.0168311
IPI00001655	C16orf80	26.8011	27.3249	27.2226	27.2914	27.7058	27.6295	0.975064	-0.426018
IPI00002884	C17orf101	26.1765	26.8988	27.6934	25.0013	25.925	26.9532	0.604418	0.963089
IPI00787343	C17orf103	23.6369	23.6295	24.718	23.6322	23.8089	24.6768	0.0309606	-0.044548
IPI00783706	C17orf28	28.9065	28.3868	28.2099	28.8079	28.1659	27.9131	0.238996	0.205435
IPI00373869	C17orf49	24.6793	24.5114	24.8219	24.4492	24.2807	25.3556	0.0234763	-0.0242748
IPI00867503	C17orf71	27.1136	28.9793	28.4103	27.5433	29.7199	29.0161	0.281769	-0.592047
IPI00029473	C17orf75	25.0964	23.8668	26.099	24.7813	23.7568	25.8291	0.0939832	0.231628
IPI00797726	C17orf76	23.821	21.0627	24.8941	21.9748	19.7157	23.2358	0.453343	1.61717
IPI00782974	C17orf85	26.6691	27.164	26.1567	26.7139	27.0414	26.3642	0.0420392	-0.043244
IPI00290799	C18orf19	27.1456	27.157	27.8881	27.4042	27.5015	28.0371	0.327631	-0.250689
IPI00152407	C18orf25	23.5278	22.1987	22.6563	24.1117	21.5869	22.5498	0.0178819	0.0448049
IPI00149964	C18orf8	23.8574	25.2069	24.4625	23.2669	24.9173	24.277	0.224217	0.35523
IPI00056357	C19orf10	28.1321	28.8346	27.7198	28.2642	29.0168	27.8451	0.112374	-0.146547
IPI00477619	C19orf2	28.2911	29.2333	20.7165	27.5712	28.5732	18.9252	0.092399	1.05709
IPI00022225	C19orf29	22.2292	23.7185	23.9269	22.2715	23.1224	24.7295	0.0311577	-0.0829754
IPI00031526	C19orf43	24.4939	22.6089	25.1326	24.9378	23.0894	25.8851	0.191725	-0.558929
IPI00022317	C19orf53	23.1739	22.1665	24.79	23.6905	22.6006	25.1205	0.150738	-0.427042
IPI00012669	C19orf61	26.2483	26.8487	27.6371	26.7562	26.9116	27.9305	0.2039	-0.288016
IPI00101987	C19orf62	26.4669	26.5015	25.0692	26.8918	27.1065	25.4299	0.261279	-0.463532
IPI00004290	C1orf107	23.9529	24.8527	24.2362	25.2683	26.0621	25.6103	1.68103	-1.29963
IPI00394805	C1orf122	25.6554	25.8975	24.5583	25.74	26.0193	24.7146	0.074219	-0.120907
IPI00015351	C1orf128	26.5818	26.2593	24.3358	26.1316	26.7001	25.417	0.170193	-0.357276
IPI00470594	C1orf144	28.6149	28.6566	27.5975	28.9481	28.9306	27.9771	0.280456	-0.328954
IPI00013912	C1orf198	25.6447	25.8658	23.577	25.3042	25.1574	23.7139	0.125307	0.303996
IPI00334914	C1orf25	21.4691	22.678	24.804	21.6656	23.1814	24.79	0.0596512	-0.228661
IPI00386043	C1orf27	27.728	26.4137	25.6868	27.5799	26.6067	25.6416	3.69425e-05	9.28243e-05
IPI00830136	C1orf31	23.7064	23.5854	23.692	17.3842	17.8719	17.3842	5.4789	6.11444
IPI00012198	C1orf50	22.2682	22.4516	20.7512	22.3918	22.9309	20.4331	0.0344817	-0.0949237
IPI00291401	C1orf52	26.2937	26.1347	27.2464	23.8635	23.7185	24.8751	2.05828	2.40595
IPI00514501	C1orf57	26.7038	27.2018	26.4161	26.1133	26.5503	25.4515	0.870323	0.735546
IPI00065500	C1orf58	28.4167	28.1821	27.6199	28.3195	28.1005	27.586	0.0777365	0.0708885
IPI00719040	C1orf77	30.7908	30.9169	31.6419	30.8846	31.0217	31.8256	0.117199	-0.127421
IPI00016634	C20orf11	27.2597	27.4902	26.2912	27.5673	27.9371	26.6313	0.273686	-0.364857
IPI00019451	C20orf20	24.0535	23.3694	19.2139	25.1976	24.1896	19.4164	0.111949	-0.722314
IPI00396969	C20orf24	28.4547	28.1022	28.6166	27.7035	27.3664	27.9413	1.48086	0.720762
IPI00552634	C20orf27	28.6879	28.1259	28.7258	27.8309	27.4368	27.9352	1.46733	0.778921
IPI00031131	C20orf3	29.7285	30.2473	29.8303	29.2947	30.0282	29.6607	0.445366	0.274223
IPI00746691	C20orf30	27.3425	25.0744	27.5007	27.3811	25.8303	27.3013	0.0747706	-0.198367
IPI00791333	C20orf4	21.8429	22.2445	20.6431	22.3502	22.736	21.233	0.33091	-0.529599
IPI00218962	C20orf43	25.7379	22.6993	26.1272	25.8624	22.7115	26.4753	0.0343136	-0.161578
IPI00106573	C20orf7	23.945	23.3876	25.0143	23.4474	23.2544	24.5	0.245541	0.381695
IPI00024913	C21orf33	30.5001	29.9681	30.1428	30.4357	29.9591	30.4301	0.116571	-0.0712846
IPI00001364	C21orf66	24.418	24.0419	25.1661	24.4171	24.1826	25.2683	0.0598544	-0.0806395
IPI00880089	C22orf25	25.243	23.9172	25.079	23.8418	22.3013	22.8695	1.32895	1.74222
IPI00550689	C22orf28	32.861	32.6565	32.7299	33.1113	32.8069	32.8069	0.605674	-0.159204
IPI00748099	C22orf9	23.1953	20.8722	22.3345	22.5139	20.6039	22.2682	0.138248	0.338631
IPI00471978	C2CD2	21.8218	21.9017	22.3296	22.4212	22.0343	22.538	0.646242	-0.313473
IPI00014194	C2orf29	26.6291	25.9461	25.2796	26.7943	26.4016	25.5524	0.216586	-0.297847
IPI00658115	C2orf43	22.8033	22.8033	23.9617	22.223	22.2528	23.4415	0.421386	0.550352
IPI00291751	C2orf47	25.3556	24.9544	24.8807	25.3879	24.8395	24.9207	0.020938	0.0141811
IPI00167546	C2orf69	22.8863	22.8893	24.1588	22.994	22.9067	24.3695	0.061069	-0.111874
IPI00430803	C2orf79	24.5271	26.5785	27.1183	25.0709	27.0014	27.359	0.140256	-0.402439
IPI00171410	C3orf21	25.9619	25.8401	24.0849	26.1642	25.9997	24.2937	0.0787291	-0.190218
IPI00031679	C3orf26	24.8219	24.3822	23.3548	25.7203	25.5201	24.3167	0.742887	-0.999414
IPI00024618	C3orf37	24.843	24.6736	25.3318	25.0494	24.8689	25.4397	0.260931	-0.16986
IPI00171385	C3orf39	23.9817	23.6266	23.6585	22.4639	22.0887	22.5022	2.89229	1.40397
IPI00217748	C3orf59	21.7013	21.7676	23.0429	23.8574	23.711	24.8689	1.59391	-1.97514
IPI00396231	C3orf64	23.6266	23.5931	25.0002	23.695	23.5573	25.0627	0.0157588	-0.0317383
IPI00385928	C4orf14	20.5887	20.4331	22.3013	22.5022	23.4573	23.6186	1.4032	-2.08498
IPI00016532	C4orf27	27.8562	25.7379	25.8777	26.7581	26.9487	26.7176	0.175061	-0.317547
IPI00167492	C4orf32	22.9164	23.7043	24.4562	21.4718	22.0921	22.9432	1.16277	1.52327
IPI00396048	C4orf41	26.6139	26.8648	25.819	27.0527	27.0087	26.4352	0.463417	-0.399625
IPI00382821	C5orf32	26.2843	26.1244	26.3505	23.7397	23.5952	23.8368	4.88887	2.52919
IPI00845432	C5orf33	31.0432	30.9767	31.4169	29.7119	29.616	29.9804	2.84882	1.37617
IPI00885084	C5orf44	25.9916	25.5801	25.6706	25.9007	25.1834	25.2542	0.506968	0.301334
IPI00374272	C5orf51	23.4229	23.3423	23.6266	23.639	23.5263	23.5464	0.511279	-0.106684
IPI00855846	C6orf115	28.5602	27.7749	26.1925	28.3714	27.4618	26.112	0.0710214	0.19412
IPI00031617	C6orf125	26.0832	25.8016	26.3275	25.6484	25.4344	26.1222	0.591348	0.335831
IPI00184871	C6orf130	22.7233	24.0535	25.1391	24.2254	24.2686	26.0554	0.403035	-0.877822
IPI00945371	C6orf136	28.1684	28.1843	28.3937	28.3002	28.4178	28.5773	0.779195	-0.18294
IPI00106638	C6orf153	23.4839	18.7081	17.7505	23.3116	18.4929	16.8398	0.0568781	0.432758
IPI00419575	C7orf20	28.5124	28.5441	29.1976	28.6501	28.751	29.3102	0.192558	-0.152356
IPI00926699	C7orf23	24.7023	23.1934	24.1421	23.1224	22.9139	23.0963	1.02106	0.968423
IPI00855943	C7orf25	21.4823	21.3806	18.9252	21.6309	21.5936	20.4845	0.281228	-0.640278
IPI00043294	C7orf26	23.0933	25.4401	24.6449	23.4505	24.7698	24.9484	0.00124316	0.003184
IPI00477526	C7orf28	27.4323	27.4844	27.8376	27.3919	27.6072	27.8941	0.0848935	-0.0463072
IPI00925110	C7orf59	26.5277	26.3632	25.9244	25.5332	25.1557	24.8134	1.79792	1.10432
IPI00043741	C8orf37	25.1301	24.9457	25.4787	25.0312	25.1035	25.9534	0.205273	-0.177872
IPI00852983	C8orf38	24.2061	24.3425	25.9977	24.2537	23.8017	26.1521	0.041707	0.112916
IPI00171421	C8orf55	30.0108	29.7911	29.974	28.9542	28.6668	28.9179	3.17192	1.07899
IPI00181892	C9orf100	18.2786	18.2786	20.3106	22.2292	22.2633	23.4547	2.02658	-3.69315
IPI00844014	C9orf114	24.647	24.4241	24.2223	25.7411	25.4637	25.5245	2.81478	-1.14524
IPI00012215	C9orf16	26.1107	24.9747	27.0942	27.7865	25.1721	28.6044	0.396336	-1.12776
IPI00146380	C9orf21	24.046	22.0464	25.1253	22.1461	21.1545	23.3876	0.610544	1.50982
IPI00166873	C9orf23	25.2826	25.5345	24.2937	25.706	25.9366	24.8728	0.397782	-0.468223
IPI00175028	C9orf41	26.4572	26.7038	27.1793	26.8592	27.1857	27.9711	0.643136	-0.55857
IPI00607576	C9orf5	23.8418	24.5817	24.9301	23.8113	23.7811	24.8363	0.259905	0.308314
IPI00016408	C9orf6	24.6353	24.3898	24.9923	24.7961	24.3365	24.5055	0.224043	0.126444
IPI00375463	C9orf72	23.8717	23.0963	24.8778	23.0702	23.0732	23.6747	0.53895	0.675872
IPI00550191	C9orf78	25.9073	26.0389	25.493	27.7089	26.5884	26.211	1.00207	-1.02306
IPI00000330	C9orf80	26.8874	26.9865	26.1972	27.1183	27.1169	26.8217	0.543613	-0.328616
IPI00307680	C9orf85	21.3871	21.4718	23.5751	22.1987	22.223	23.8819	0.275926	-0.623183
IPI00827967	C9orf86	26.6503	26.4595	25.7379	26.6691	26.5219	25.912	0.0832433	-0.0851116
IPI00394767	CA13	25.7943	26.0514	26.5503	25.4647	25.4834	26.3712	0.409159	0.35887
IPI00032055	CA5B	27.9324	28.5574	28.3306	26.7786	27.4715	27.2005	1.83848	1.12331
IPI00032561	CAB39	29.7708	29.7168	30.9543	29.8136	29.8634	30.9696	0.0420445	-0.0682081
IPI00026359	CAB39L	23.2823	24.2037	25.4834	23.555	24.3659	25.7631	0.0937266	-0.238183
IPI00217498	CACNA1A	24.8322	25.7571	24.1774	23.9339	24.9049	23.1728	0.606079	0.918389
IPI00395627	CACYBP	29.5845	29.7124	29.6948	30.2204	30.3996	30.362	3.21756	-0.663466
IPI00301263	CAD	32.2305	32.1664	31.8225	32.9068	33.0319	32.6775	2.08808	-0.798906
IPI00176427	CADM4	28.5454	27.9877	27.8496	27.7943	26.9532	27.2846	1.13676	0.783509
IPI00011232	CALCOCO1	24.616	24.4431	24.8527	23.6058	23.49	24.0572	1.92615	0.919602
IPI00014516	CALD1	30.5902	30.3677	30.3447	30.3656	29.9149	30.0842	0.956689	0.31264
IPI00916768	CALM2;CALM1;CALM3	32.8273	32.6355	32.0523	32.6071	32.3258	31.8284	0.315554	0.251272
IPI00020599	CALR	35.0656	35.0055	34.8014	34.3697	34.4472	34.0654	2.02918	0.663418
IPI00045396	CALU	33.3432	33.3962	33.2635	32.4717	32.5859	32.4412	3.85256	0.834724
IPI00789155	CALU	28.8633	28.4103	27.737	28.3306	27.9268	27.374	0.463267	0.459719
IPI00028296	CAMK1	28.7044	28.6327	28.964	29.0753	29.2443	29.5732	1.39418	-0.530565
IPI00215715	CAMK2A	24.6031	23.7082	23.9817	24.6965	23.7671	24.4983	0.225037	-0.222979
IPI00827625	CAMK2D	30.8223	30.7854	30.278	30.9449	31.0087	30.4804	0.307878	-0.182739
IPI00915309	CAMK2G	28.6514	28.1715	29.1046	28.6576	28.1549	29.0873	0.00797666	0.00924683
IPI00290239	CAMKK2	25.6574	24.7528	25.1401	26.4615	25.3767	25.925	0.838249	-0.73764
IPI00884928	CAMSAP1	23.3175	23.6905	23.4434	23.5952	24.0152	24.0762	1.03558	-0.411716
IPI00409607	CAMSAP1L1	21.932	21.5418	23.2256	22.374	22.3699	23.5263	0.339244	-0.523609
IPI00100160	CAND1	33.2942	33.127	33.2734	33.2942	33.1843	33.228	0.0214234	-0.0039533
IPI00103175	CANT1	24.473	23.4811	23.3792	23.6186	22.5346	22.7115	0.783959	0.822877
IPI00020984	CANX	33.1843	33.4186	32.6861	32.9335	33.1788	32.4939	0.316228	0.227648
IPI00939159	CAP1	32.792	33.0138	32.861	32.3162	32.6775	32.5391	1.41943	0.377992
IPI00008274	CAP1	27.9753	29.3293	31.1814	27.5581	28.9711	30.7707	0.108708	0.395368
IPI00027341	CAPG	32.2006	32.1898	32.0719	31.9625	31.9967	31.8031	1.49021	0.233322
IPI00011285	CAPN1	28.3481	27.0669	28.6576	27.9994	26.8676	28.515	0.122146	0.230209
IPI00289758	CAPN2	30.9231	30.9231	30.5787	31.0267	30.9116	30.5411	0.0328965	-0.0181389
IPI00643994	CAPN5	27.0466	26.1743	25.7754	29.449	28.8796	23.7082	0.210726	-1.01353
IPI00002547	CAPN6	29.2042	29.5465	29.8193	28.857	29.1239	29.224	1.02234	0.455024
IPI00025084	CAPNS1	29.9342	29.4955	29.1893	30.1306	29.6409	29.4029	0.239656	-0.185095
IPI00783872	CAPRIN1	31.3104	31.2762	31.5983	32.1787	32.1354	32.4816	2.3649	-0.870228
IPI00005969	CAPZA1	30.9155	30.6114	30.4931	30.9543	30.4645	30.3047	0.159477	0.098793
IPI00026182	CAPZA2	31.1245	31.1762	30.8846	30.6301	30.5902	30.4499	2.06426	0.505047
IPI00218782	CAPZB	32.943	32.9559	32.9908	32.5832	32.5762	32.7079	2.78379	0.340731
IPI00026185	CAPZB	26.355	26.8296	27.9918	25.985	26.2868	27.3105	0.349982	0.531324
IPI00554741	CARD16	26.5558	27.1364	28.2235	27.528	27.8108	28.7619	0.520264	-0.728376
IPI00304409	CARHSP1	28.7621	29.2273	26.5277	28.1516	28.7258	26.3092	0.149236	0.443485
IPI00639957	CARM1	29.7577	29.5639	29.4505	30.7147	30.6133	30.4645	3.0217	-1.00682
IPI00027443	CARS	30.8241	31.0148	30.1142	31.1498	31.3949	30.1928	0.222931	-0.261435
IPI00289491	CASC3	26.5982	26.4099	26.6798	25.7805	25.6344	26.2912	1.43213	0.66056
IPI00103873	CASD1	21.0735	21.1678	22.6314	21.233	21.3534	22.7165	0.0725037	-0.143391
IPI00385480	CASKIN1	25.2097	25.0102	26.1521	26.2817	26.1107	26.4196	1.05188	-0.813333
IPI00103516	CASKIN2	23.3011	23.242	24.4148	22.3876	22.3806	23.5447	0.744819	0.881648
IPI00021800	CASP1	26.1178	26.211	25.3556	26.5982	26.751	25.8777	0.602841	-0.514141
IPI00292140	CASP3	29.9304	29.8193	30.1306	29.9964	29.6228	29.8609	0.396434	0.133378
IPI00023876	CASP6	26.2912	26.4341	24.5653	25.8375	26.1626	24.2186	0.157553	0.357304
IPI00216675	CASP7	26.7332	25.6706	24.2837	26.5198	26.6588	25.3002	0.290937	-0.597124
IPI00220726	CASP8	23.7966	24.1663	24.5867	24.1344	24.4898	24.3231	0.204465	-0.132513
IPI00761160	CAST	23.515	25.1003	27.4592	23.8434	24.3987	27.5334	0.0204677	0.0996666
IPI00465436	CAT	30.2999	30.4718	31.0666	29.9521	30.1164	30.6985	0.477892	0.357109
IPI00009236	CAV1	30.4285	30.6985	29.1367	29.6505	29.8282	28.3967	0.53167	0.796141
IPI00295598	CBARA1	26.6818	25.9135	25.7506	27.1278	25.0088	26.3058	0.0156816	-0.0321865
IPI00024871	CBFB	27.166	27.6489	27.113	28.1088	28.4261	28.068	1.91763	-0.891637
IPI00027269	CBL	26.7487	26.5531	27.7264	26.5261	26.6256	27.4715	0.103168	0.134998
IPI00290429	CBLL1	23.9461	23.7811	24.5375	23.8368	23.692	24.9733	0.0588115	-0.0791143
IPI00295386	CBR1	27.668	28.2157	27.521	27.3217	27.9665	27.6173	0.231741	0.166443
IPI00290462	CBR3	29.3418	29.4624	29.2333	29.4304	29.632	29.4905	0.898413	-0.171803
IPI00384297	CBR4	26.0894	26.9872	27.166	25.1256	26.0365	26.4299	0.800627	0.883531
IPI00878669	CBX1	27.2695	24.6457	26.5606	26.8939	24.916	26.3212	0.0398815	0.114914
IPI00297579	CBX3	29.7149	29.0291	28.4559	30.0982	29.5066	28.886	0.354485	-0.430293
IPI00010872	CBX4	24.6144	24.2583	23.8864	25.1557	24.6015	24.8673	1.10687	-0.621827
IPI00024662	CBX5	29.481	29.0855	29.0031	30.2531	29.9422	29.8802	1.95264	-0.835327
IPI00307659	CBX8	26.0684	25.1381	26.6339	26.7548	26.0389	27.6501	0.609854	-0.867775
IPI00021305	CC	24.3167	24.04	23.0326	24.7112	24.9144	23.711	0.530259	-0.64906
IPI00302647	CC2D1A	26.2304	26.8505	27.7481	25.241	26.2731	28.0571	0.169764	0.419294
IPI00644671	CC2D1B	28.1793	28.159	28.3521	28.1669	28.2787	28.5517	0.323999	-0.102317
IPI00217357	CCAR1	30.2204	29.9723	29.6033	30.2445	29.984	29.7407	0.0888742	-0.0577037
IPI00465373	CCBL2	26.8964	26.5082	26.3212	26.3679	25.5633	25.5828	1.10219	0.737255
IPI00046828	CCD	30.0494	29.2287	30.6139	30.3267	29.6872	30.7402	0.221727	-0.287333
IPI00412539	CCDC104	27.2018	27.0252	26.1107	26.9367	26.5184	25.4637	0.355562	0.47298
IPI00171573	CCDC109A	29.4419	29.1028	28.7562	29.1962	28.9164	28.5803	0.310688	0.202635
IPI00927042	CCDC109B	25.5848	23.846	24.046	25.0818	23.5019	23.7537	0.1985	0.379775
IPI00178611	CCDC109B	26.884	27.042	25.7031	27.0466	26.9227	25.9916	0.0720618	-0.110611
IPI00925918	CCDC12	24.2199	24.3737	20.5301	24.7627	24.7373	21.0735	0.0987095	-0.483243
IPI00060627	CCDC124	22.5859	20.6039	23.372	22.5559	20.5139	23.3175	0.0164297	0.0581525
IPI00658073	CCDC126	22.7627	22.4837	21.0082	23.0263	22.3876	20.7797	0.00774666	0.0203209
IPI00553067	CCDC132	20.9013	26.3445	21.4414	20.5729	25.8988	21.8218	0.0184628	0.131218
IPI00302674	CCDC134	26.3467	26.4808	26.3774	26.5774	26.5727	26.605	1.92877	-0.183449
IPI00550977	CCDC21	24.4911	23.7837	23.937	24.5074	24.4035	24.4509	0.818364	-0.383375
IPI00022265	CCDC22	26.8113	26.4582	26.8964	26.6869	26.3785	26.6265	0.409065	0.158014
IPI00166445	CCDC23	23.3145	23.258	22.3523	21.7947	21.8218	21.747	1.71838	1.18707
IPI00396174	CCDC25	28.5619	28.2548	27.7616	28.9552	28.5636	28.5732	0.882294	-0.504568
IPI00792109	CCDC43	22.0948	26.3161	25.666	22.8058	26.6834	25.9359	0.0904051	-0.449432
IPI00024642	CCDC47	30.7981	30.8846	30.7574	31.0609	31.0588	30.8131	0.843399	-0.164227
IPI00217059	CCDC50	25.1531	27.4573	28.9142	25.6595	28.0356	29.1239	0.103656	-0.431484
IPI00153023	CCDC51	24.7146	26.0077	25.8615	24.3506	25.2826	25.2386	0.487845	0.570663
IPI00166121	CCDC52	21.4718	21.5556	22.1348	22.4174	22.4133	23.4434	1.21512	-1.03726
IPI00032848	CCDC53	27.4573	27.1444	27.934	27.262	27.2263	30.0656	0.279515	-0.67272
IPI00000634	CCDC6	27.164	26.8469	26.9833	27.6148	27.4959	27.3861	1.94145	-0.500842
IPI00005149	CCDC76	21.7794	21.8218	22.471	22.6056	22.5446	23.7966	0.965146	-0.958174
IPI00171134	CCDC88A	27.6173	28.4151	28.662	27.7002	28.1295	28.6585	0.0565624	0.0687275
IPI00740019	CCDC88C	26.9677	27.0281	26.4401	27.185	27.262	26.4885	0.208716	-0.166501
IPI00152975	CCDC90A	25.9183	26.7427	25.0768	25.6163	26.4825	24.977	0.124319	0.220666
IPI00549236	CCDC90B	27.8128	27.9641	28.1932	27.3291	27.7023	27.7395	1.09611	0.399752
IPI00154668	CCDC93	28.7675	28.8397	28.1659	28.4241	28.662	27.7584	0.376954	0.309559
IPI00306471	CCDC94	21.1117	21.5333	18.097	22.6006	23.1728	20.5729	0.62809	-1.86807
IPI00619952	CCM2	23.3355	23.8245	22.7283	23.1617	23.9763	22.0948	0.127087	0.21852
IPI00028098	CCND1	27.0348	27.1259	26.3422	25.5524	25.5738	25.4255	2.19559	1.31707
IPI00783214	CCNK	24.9558	25.1401	25.2703	24.9355	25.3462	25.5687	0.320175	-0.161418
IPI00654682	CCNL1	24.5364	24.6193	22.54	24.9717	24.4241	22.6449	0.0399877	-0.114964
IPI00030247	CCNT1	25.7571	25.8115	25.6996	25.4363	25.6624	25.5557	1.31523	0.204628
IPI00465457	CCNY	22.1434	25.1712	22.4212	21.5869	24.2551	21.3042	0.254289	0.863202
IPI00021389	CCS	27.5673	28.2049	26.9689	27.1505	27.7426	26.4866	0.373755	0.453798
IPI00297779	CCT2	33.69	33.3697	33.3962	33.9843	33.7275	33.5963	0.86124	-0.284055
IPI00553185	CCT3	33.6402	33.6973	33.3432	34.0062	33.9843	33.6799	1.01789	-0.329891
IPI00302927	CCT4;ILK-2	34.0062	34.0003	34.0654	34.1799	34.2131	34.2131	2.78683	-0.178048
IPI00010720	CCT5	33.8589	33.8589	34.02	34.0798	34.1046	34.2955	1.33441	-0.247396
IPI00027626	CCT6A	33.4507	33.5472	33.1843	33.874	33.8996	33.614	1.32645	-0.401759
IPI00553070	CCT6B	25.819	25.4941	25.5966	27.5318	27.0472	25.4133	0.725856	-1.02748
IPI00220656	CCT6B	24.9019	23.3643	25.891	25.5687	23.8966	26.5686	0.228671	-0.625561
IPI00018465	CCT7	33.8486	33.9671	33.7195	34.2025	34.3158	33.9843	1.25379	-0.322453
IPI00784090	CCT8	33.911	33.9411	33.5932	34.222	34.3511	33.9233	0.973624	-0.350374
IPI00298851	CD151	20.6431	24.5778	22.3208	20.0776	23.0326	21.9191	0.229667	0.837478
IPI00793688	CD276	26.9512	27.1894	28.5441	25.8669	26.1695	27.5178	0.666759	1.04347
IPI00412771	CD2AP	27.8632	28.2209	27.7501	28.2728	28.5066	27.8207	0.44552	-0.255301
IPI00006103	CD2BP2	26.0243	25.6868	26.6569	26.2777	24.7813	27.042	0.0419782	0.0890026
IPI00022933	CD74	20.8947	20.7797	22.0232	24.804	24.4409	25.7004	2.62957	-3.74922
IPI00386747	CDAN1	23.1934	23.1566	24.3275	22.997	22.9106	24.0669	0.165021	0.234335
IPI00005670	CDC123	26.2853	25.4515	24.7926	26.355	26.2853	25.4555	0.42966	-0.522132
IPI00022091	CDC16	27.3641	27.1323	27.1493	27.8128	27.5444	27.6713	1.89299	-0.460944
IPI00005822	CDC23	27.824	27.7204	27.7567	27.9548	27.9863	28.1398	1.79834	-0.259925
IPI00794278	CDC27	26.6313	27.5025	27.7709	27.0823	27.4269	27.5272	0.0404156	-0.0438983
IPI00027120	CDC34	26.9969	26.1009	27.3217	25.2622	26.0684	28.1082	0.130255	0.326915
IPI00013122	CDC37	29.4739	29.5006	28.5699	29.9253	29.8121	28.7935	0.280135	-0.328818
IPI00302028	CDC37L1	27.0226	26.605	27.2161	26.4899	27.1481	27.6538	0.145167	-0.149357
IPI00026307	CDC40	24.8311	23.3021	22.8734	25.3088	24.0957	23.9665	0.465692	-0.788117
IPI00007189	CDC42	25.0164	24.5902	25.1067	25.3318	25.4787	25.5345	1.47973	-0.543859
IPI00903296	CDC42BPA	24.0684	23.06	22.4013	24.7767	24.2661	21.6656	0.134278	-0.392904
IPI00477763	CDC42BPB	28.8711	29.1553	29.4589	28.7294	29.1802	29.3635	0.100148	0.0707537
IPI00009533	CDC42EP2	22.0817	21.6641	23.3245	21.8138	21.7331	23.1098	0.0722135	0.137859
IPI00024972	CDC42SE1	26.4986	26.6893	28.8711	26.0632	26.5935	28.6271	0.0838806	0.258411
IPI00024973	CDC42SE2	26.3747	25.1931	25.6806	26.5326	25.0568	25.8156	0.0321856	-0.0521851
IPI00465294	CDC5L	30.0634	29.873	29.5304	30.0561	29.6948	29.6409	0.0419621	0.0250378
IPI00300659	CDC73	28.094	28.5321	27.6847	28.4075	28.7829	28.045	0.402437	-0.30822
IPI00010428	CDCA3	22.1177	23.0671	22.1434	21.1318	22.4639	21.4691	0.675295	0.754482
IPI00026689	CDK1	29.4707	30.0465	29.5831	30.4546	30.8579	30.6057	1.94346	-0.939268
IPI00021175	CDK12	24.0572	23.7064	21.3806	23.8245	24.8292	22.4212	0.231081	-0.643575
IPI00456970	CDK13	21.6358	21.4239	19.3444	22.9527	22.1273	19.6865	0.255912	-0.787458
IPI00165249	CDK14	27.253	28.2432	27.8442	27.453	28.1497	28.0185	0.0931584	-0.0935529
IPI00376955	CDK17	22.8825	22.8825	24.0572	23.1018	23.0089	24.1718	0.101949	-0.153406
IPI00414292	CDK18	24.4449	26.0193	26.6486	23.6088	25.0267	25.8885	0.389846	0.862928
IPI00250316	CDK19	30.0589	29.7563	29.867	29.4624	29.2212	29.3399	2.09834	0.552904
IPI00031681	CDK2	28.0995	27.7697	27.3919	28.6668	28.2297	27.8198	0.693126	-0.485041
IPI00022340	CDK2AP1	22.2569	24.3453	26.2213	23.9734	24.1274	26.4325	0.152676	-0.569951
IPI00007811	CDK4	29.5181	29.1784	29.901	29.0951	28.653	29.3043	0.843063	0.515019
IPI00023530	CDK5	30.3677	29.9521	30.0332	29.9458	29.515	29.4934	1.12667	0.466277
IPI00328276	CDK5RAP1	21.9788	21.5936	23.2669	22.4959	21.9931	23.6164	0.238333	-0.422045
IPI00329038	CDK5RAP2	24.7834	22.7898	25.7989	24.2675	23.6569	25.2848	0.0179817	0.0542889
IPI00414442	CDK5RAP3	29.1784	28.5803	29.0291	29.2768	28.529	29.0192	0.0144608	-0.012387
IPI00023529	CDK6	28.9542	29.4707	30.2227	29.0403	29.6607	29.0582	0.283572	0.296141
IPI00000685	CDK7	24.9436	25.925	26.0222	25.8866	26.5102	27.1793	0.815844	-0.895081
IPI00552413	CDK9	26.0104	26.4223	25.7912	27.4599	26.5774	25.589	0.338128	-0.467473
IPI00015713	CDKAL1	20.8384	22.7165	22.2445	21.4414	23.2823	22.5278	0.246388	-0.48405
IPI00020991	CDKN2AIP	25.6981	26.1665	25.2669	25.2591	26.0876	24.8654	0.27732	0.306475
IPI00063181	CDKN2AIPNL	26.1009	27.7523	26.8874	25.9203	28.1195	27.4008	0.104502	-0.233296
IPI00001564	CDKN2C	25.8083	24.6583	28.7205	24.9036	24.3106	27.6093	0.191152	0.787823
IPI00395950	CDR2L	27.2144	27.3886	28.0342	27.1756	27.4773	29.3776	0.251259	-0.464451
IPI00014197	CDV3	29.6695	29.5601	29.2042	30.3138	30.2184	29.8318	1.46629	-0.643408
IPI00790637	CDX1	28.0478	28.6891	28.1321	27.8013	28.3371	27.8442	0.485677	0.295418
IPI00289773	CEBPB	26.0255	26.6526	26.3686	26.8276	26.8941	26.6121	1.00512	-0.42905
IPI00306723	CEBPZ	25.3391	25.4255	23.4073	26.5184	26.7338	24.616	0.583558	-1.23208
IPI00647185	CEP170	27.5083	28.2728	28.2032	27.3371	28.226	28.094	0.10664	0.109093
IPI00784201	CEP290	26.6798	27.4786	27.4825	26.7038	27.7354	27.3902	0.0535889	-0.0628332
IPI00101532	CEP55	22.6682	23.1581	22.8058	24.4219	23.6322	24.1703	1.91755	-1.19746
IPI00005775	CEPT1	29.6505	26.3747	27.1406	29.2124	26.1272	27.0087	0.070685	0.272501
IPI00295595	CERCAM	22.8787	22.8734	24.699	21.6416	21.6358	22.9597	0.871159	1.40472
IPI00332828	CES2	27.7887	27.3542	26.9473	27.1364	26.6339	26.5224	0.908852	0.599166
IPI00215928	CETN2	27.2636	27.8172	26.8889	27.4948	28.406	27.1456	0.317856	-0.358917
IPI00007306	CFDP1	27.7426	27.9554	27.034	28.3371	28.4273	27.5413	0.591933	-0.524592
IPI00012011	CFL1	34.6002	34.4472	34.2307	34.3511	34.1799	34.0372	0.776507	0.236635
IPI00413344	CFL2	30.3032	30.6002	29.4646	30.2793	30.4476	29.2961	0.0822085	0.114991
IPI00295585	CGGBP1	24.7295	25.5615	25.7473	25.2746	26.0334	26.355	0.533024	-0.54156
IPI00011857	CHAF1B	24.5353	24.5375	24.5902	25.5512	25.3409	25.3933	3.73392	-0.874107
IPI00927150	CHCHD3	30.6548	29.6807	30.4177	30.1142	29.0682	30.2287	0.401788	0.447367
IPI00552793	CHCHD7	25.1466	24.941	24.6144	23.4716	23.3919	23.258	3.09978	1.52683
IPI00009817	CHCHD8	24.3275	23.4877	23.9215	23.1415	22.7035	22.6873	1.70197	1.06813
IPI00297851	CHD1	26.449	27.007	25.2289	26.3747	27.2067	25.706	0.106354	-0.200843
IPI00329088	CHD1L	25.6868	26.8964	26.1879	25.4333	26.432	25.9599	0.279185	0.315303
IPI00815893	CHD2	21.0627	20.5729	22.6266	22.5923	21.7947	23.6731	0.700127	-1.26594
IPI00465222	CHD3;LOC7	25.8866	26.7817	26.8567	26.7726	27.8922	28.0498	0.979616	-1.06322
IPI00455210	CHD4	32.1425	32.2626	31.7858	32.4179	32.6496	32.1571	0.787903	-0.344597
IPI00398992	CHD8	28.9375	29.3605	29.7263	28.723	29.3476	29.5698	0.13879	0.127949
IPI00333010	CHERP	30.424	29.9489	30.3199	30.7854	30.3242	30.7612	0.879233	-0.392685
IPI00306719	CHID1	25.8343	25.6256	24.9173	24.5902	24.0053	23.5067	1.5665	1.42495
IPI00409761	CHKA	21.5333	21.6002	20.9225	22.0521	22.0817	22.1434	1.56703	-0.740396
IPI00031758	CHKB	26.2499	24.8469	25.9841	26.002	24.5411	25.7452	0.159097	0.264182
IPI00028099	CHM	26.5774	27.9853	27.1982	26.8943	28.2322	27.1406	0.105066	-0.168739
IPI00382452	CHMP1A	27.8624	27.2712	29.0516	27.6606	27.3524	28.9353	0.0375435	0.0789668
IPI00156984	CHMP1B	26.3127	28.1005	28.2415	25.8303	27.841	28.2235	0.0934493	0.253324
IPI00004416	CHMP2A	27.2669	27.2914	26.6369	26.7499	26.7707	26.2627	0.803033	0.470642
IPI00550181	CHMP2B	26.3205	26.4325	26.3287	25.9676	26.4106	26.2899	0.430244	0.137861
IPI00025974	CHMP4B	30.9609	30.9937	31.5771	31.1441	31.0267	31.7176	0.151587	-0.118867
IPI00100796	CHMP5	29.3174	29.2458	28.2373	28.8876	28.9236	27.9168	0.303037	0.357536
IPI00305423	CHMP6	26.6743	26.257	27.3664	26.9325	26.6209	27.7983	0.298148	-0.351309
IPI00395463	CHMP7	25.706	26.2731	24.8706	26.0147	26.2562	25.3409	0.199208	-0.254011
IPI00015897	CHORDC1	30.6301	30.7919	30.5924	30.8768	31.0746	30.7981	1.12418	-0.245044
IPI00218924	CHP	28.5947	28.6677	28.0302	28.3741	28.2432	27.9853	0.423892	0.230007
IPI00465319	CHPF	25.2877	24.916	23.49	24.1826	24.3001	22.9139	0.470403	0.765732
IPI00010158	CHRAC1	21.689	21.7583	24.3695	22.6813	22.6266	22.5259	0.00210444	-0.00569344
IPI00044326	CHST14	23.6783	23.552	24.7579	22.058	22.0893	23.2912	1.27514	1.51654
IPI00178203	CHTF18	22.8929	22.3562	22.7849	23.4665	22.5259	23.019	0.44066	-0.325757
IPI00005104	CHUK	26.6935	28.4989	26.0255	27.0837	28.7372	26.3526	0.113093	-0.318511
IPI00008791	CIAO1	26.7657	26.6188	26.5897	27.1169	27.0281	27.1183	2.64043	-0.429717
IPI00387130	CIAPIN1	26.1222	26.4299	26.8317	26.2937	26.7827	27.0766	0.346003	-0.256395
IPI00045360	CIC	25.4363	25.726	24.9907	25.6083	25.7352	25.1003	0.122699	-0.0969588
IPI00641579	CIRBP	25.1818	23.8089	25.1278	25.216	24.3695	24.661	0.02792	-0.042649
IPI00239815	CIRH1A	24.5833	25.2796	24.5641	24.9393	26.002	25.314	0.71373	-0.609472
IPI00020510	CISD1	29.1656	28.9335	29.9134	28.6427	28.3306	29.308	0.629402	0.577068
IPI00166865	CISD2	28.8266	28.6718	28.8796	28.9932	28.7447	29.0087	0.508148	-0.12286
IPI00719285	CIT	26.5381	27.1041	25.7711	27.592	27.8095	26.3015	0.555552	-0.763236
IPI00921422	CKAP5	30.8734	30.7047	30.897	31.4684	31.4064	31.4584	3.20726	-0.619373
IPI00015104	CKS1B	27.3774	27.3603	26.2642	28.146	28.1244	26.9562	0.618673	-0.74155
IPI00015105	CKS2	24.7403	23.8574	25.63	24.9544	24.1179	25.7031	0.0950184	-0.182544
IPI00396279	CLASP1	28.7305	28.6821	28.2049	29.1293	29.1513	28.6166	0.815404	-0.426573
IPI00925217	CLASP2	28.4273	28.0101	29.0823	29.0536	28.5124	29.4739	0.534234	-0.506714
IPI00045511	CLCC1	26.05	25.1562	25.8647	28.3016	28.0302	28.6821	2.87521	-2.64769
IPI00413568	CLCN3	23.0222	22.997	24.1563	23.945	23.791	24.9601	0.726072	-0.840222
IPI00816067	CLCN5	28.2177	27.5835	27.6686	28.1631	27.4825	27.7426	0.0327598	0.0272497
IPI00180121	CLCN6	26.9708	23.763	25.1139	27.4416	24.8102	25.9007	0.253529	-0.768299
IPI00020524	CLCN7	24.5817	25.126	23.514	24.5665	24.3822	23.6545	0.138791	0.206163
IPI00010896	CLIC1	31.8176	32.0591	31.0718	31.8778	32.0848	31.2154	0.0673744	-0.0765177
IPI00001960	CLIC4	31.8561	31.6807	31.1762	32.3865	32.2451	31.2016	0.36666	-0.373364
IPI00291930	CLINT1	31.445	31.4861	31.6207	31.4959	31.3844	31.627	0.0582128	0.0147896
IPI00013455	CLIP1	29.5006	29.8504	30.1098	30.4755	30.4718	30.5911	1.73002	-0.692512
IPI00019642	CLIP2	27.1041	27.6723	26.8146	27.3756	27.5533	27.221	0.277755	-0.186319
IPI00847415	CLK3	26.74	26.7291	26.2748	26.547	26.8217	26.4092	0.0193355	-0.0113551
IPI00180143	CLK4	21.6002	21.6756	21.862	21.965	21.9712	23.0055	0.782409	-0.601304
IPI00922070	CLN6	23.5573	23.4474	22.9597	23.6851	23.5597	23.3228	0.401297	-0.201075
IPI00004795	CLNS1A	27.6504	26.8939	27.3303	28.3596	27.7453	28.0378	1.25829	-0.756095
IPI00024381	CLP1	26.432	25.7506	24.8986	26.4986	25.9661	24.9717	0.0654754	-0.118432
IPI00006615	CLPB	28.7502	29.1713	29.1293	28.9866	28.9793	29.0823	0.00202835	0.000857035
IPI00003870	CLPP	30.5066	30.2836	29.6399	30.2554	30.0612	29.2721	0.284645	0.280495
IPI00107357	CLPTM1	28.8196	28.1398	28.3741	29.0087	28.6677	28.6223	0.618552	-0.321732
IPI00151358	CLPTM1L	25.7279	26.1472	25.329	25.5557	25.9862	24.9671	0.241651	0.231686
IPI00008728	CLPX	30.0777	30.3267	30.3267	29.8868	29.987	29.9084	1.63438	0.316261
IPI00014587	CLTA	31.5662	31.8304	32.2549	31.2165	31.6176	31.9161	0.454075	0.300465
IPI00014589	CLTB	30.3121	31.286	31.7902	29.632	30.4285	30.9971	0.590997	0.776885
IPI00024067	CLTC	35.7286	35.7286	35.2739	35.3299	35.3299	34.9425	0.879947	0.376214
IPI00303158	CMAS	28.1122	28.6096	27.7725	27.5015	27.7317	27.1001	1.10989	0.720299
IPI00383046	CMBL	30.3047	30.2979	30.7304	27.5409	27.8896	27.9583	3.78857	2.64806
IPI00219953	CMPK1	31.3506	30.7981	30.9735	30.828	30.2845	30.3242	1.10489	0.561825
IPI00177728	CNDP2	30.4645	30.4403	30.0131	30.5924	30.4851	30.0714	0.130903	-0.0769628
IPI00910593	CNN2	31.9015	31.8843	32.8351	31.8142	31.6825	32.788	0.0846121	0.112068
IPI00216682	CNN3	32.4939	32.4552	32.31	32.2126	32.1253	32.1024	1.85731	0.272966
IPI00168565	CNNM3	19.8716	23.0446	21.6416	21.5556	23.3548	22.9286	0.440001	-1.09372
IPI00418426	CNNM4	25.0284	24.0639	22.8544	24.0262	23.695	21.5163	0.375945	0.903088
IPI00020002	CNO	24.1977	25.493	25.7078	23.816	24.79	24.3689	0.666577	0.807857
IPI00166010	CNOT1	31.3263	31.5729	31.6807	31.751	31.8176	31.2731	0.163243	-0.0872421
IPI00878368	CNOT10	27.6217	27.6754	29.0107	28.0111	28.0893	29.1924	0.215128	-0.328372
IPI00005011	CNOT2	28.0403	28.1684	28.3785	28.4273	28.711	28.8329	1.38494	-0.461323
IPI00005015	CNOT3	26.8821	28.1244	27.307	27.5253	28.0472	27.7198	0.341696	-0.326249
IPI00410685	CNOT4	22.3013	24.1563	24.2718	24.2551	24.4395	24.5817	0.587191	-0.848968
IPI00164061	CNOT6L	22.4919	24.524	24.7834	22.9376	24.5375	25.5404	0.143456	-0.405403
IPI00006552	CNOT7	25.7989	25.6083	23.8245	25.6932	25.4133	23.9702	0.0208811	0.0516688
IPI00295501	CNOT8	25.5376	23.4357	25.6416	26.6369	24.2851	26.195	0.33837	-0.834024
IPI00443909	CNPY2	30.9664	31.1914	31.5782	30.7981	30.9389	31.1391	0.632388	0.286637
IPI00551062	CNPY3	30.0453	29.5573	29.0192	30.0634	29.5343	29.0351	0.00288921	-0.00370852
IPI00166955	CNPY4	26.9487	26.6369	27.6398	26.7707	26.6139	27.4436	0.123965	0.132404
IPI00909064	COASY	24.5411	25.4555	25.6199	23.6585	24.8383	24.7005	0.737519	0.806378
IPI00807339	COBLL1	29.0392	29.4	29.3068	28.6566	29.131	29.0076	0.822233	0.316924
IPI00103483	COBRA1	27.586	27.2197	28.2787	27.95	27.3464	28.4989	0.200563	-0.23696
IPI00141561	COG1	26.165	25.7393	24.6419	25.8023	25.8053	24.7233	0.0422064	0.0717583
IPI00000057	COG2	26.1159	26.3293	27.1022	25.8601	26.0203	27.0005	0.181667	0.222158
IPI00414858	COG3	28.261	27.3223	27.871	27.8881	27.1833	27.3405	0.429265	0.347472
IPI00149849	COG4	28.0966	27.829	28.3671	28.6223	28.0219	28.3326	0.417067	-0.228002
IPI00377050	COG5	29.0087	28.8145	27.8183	29.2611	29.3988	28.9142	0.746996	-0.644135
IPI00642611	COG6	26.1626	25.6147	22.8947	26.2444	25.6825	23.1581	0.0335446	-0.137673
IPI00164005	COG7	26.3287	26.4715	25.3174	26.5073	26.4729	25.4384	0.0694745	-0.100344
IPI00006442	COIL	23.0963	22.8929	21.5333	24.3231	24.2087	22.7706	0.834723	-1.25998
IPI00176193	COL14A1	26.0876	27.2567	25.6963	22.1434	22.0198	25.7279	1.10044	3.0498
IPI00297646	COL1A1	30.4681	30.4476	30.0271	29.4354	28.4802	28.6514	1.95123	1.45863
IPI00304962	COL1A2	28.3902	27.8562	28.5823	26.1681	25.6752	27.8641	1.15079	1.7071
IPI00021033	COL3A1	26.4885	25.2785	25.2002	25.1357	22.9884	24.6201	0.849261	1.40766
IPI00743696	COL4A1	31.2269	32.112	30.2244	30.3822	31.1783	29.3317	0.510829	0.890409
IPI00306322	COL4A2	28.4394	28.2883	28.7786	29.1381	27.2405	29.1821	0.00907812	-0.018102
IPI00657692	COL4A3BP	28.2921	27.7395	28.8738	28.5142	27.6934	28.8776	0.0425829	-0.0599047
IPI00216007	COL4A5	23.6322	22.5139	22.2357	22.0547	21.2477	20.9626	1.19965	1.37229
IPI00552815	COL5A1	26.5785	26.5261	26.1261	25.2018	24.9785	24.5867	2.53402	1.48791
IPI00844090	COL5A1	29.4102	28.2363	28.5814	28.1998	26.8648	27.307	1.15167	1.2854
IPI00739099	COL5A2	26.6108	25.8239	25.4272	25.246	24.3725	23.8185	1.27676	1.47496
IPI00291136	COL6A1	29.7263	29.9931	29.8463	28.7305	28.8055	28.7717	3.7652	1.08601
IPI00304840	COL6A2	27.1406	25.4994	25.2839	26.3015	24.5653	23.9692	0.491461	1.02934
IPI00022200	COL6A3	30.2419	30.2952	30.3242	29.265	29.1638	29.1249	4.66385	1.10252
IPI00414467	COLEC12	29.1239	29.5499	29.9058	28.9164	29.1394	29.6575	0.385869	0.288772
IPI00220976	COLQ	25.5543	25.5828	26.5643	25.1834	25.3955	26.215	0.264026	0.302522
IPI00171117	COMMD1	25.7631	25.3689	26.7344	25.6825	25.0252	26.6714	0.0923401	0.162436
IPI00412811	COMMD10	25.2069	25.818	25.8023	25.3612	25.6484	26.1626	0.137477	-0.114953
IPI00456048	COMMD2	26.7127	26.8342	27.359	26.5015	26.8411	27.0297	0.285418	0.177867
IPI00015773	COMMD3	26.902	26.9029	26.3753	26.977	26.9677	26.0937	0.0473652	0.0472431
IPI00413500	COMMD4	24.9339	26.0554	25.486	25.2238	25.9534	25.4059	0.0309629	-0.035937
IPI00743772	COMMD7	25.1655	25.9387	25.2643	25.2877	25.7411	25.098	0.0931003	0.0805931
IPI00305212	COMMD9	27.1833	27.7887	27.3047	27.0727	27.6054	27.166	0.228265	0.144187
IPI00011284	COMT	27.6054	26.6178	26.5436	27.9488	27.0648	26.7427	0.264988	-0.329868
IPI00295857	COPA	33.9411	33.7076	33.614	33.6733	33.5577	33.3697	0.772985	0.220632
IPI00295851	COPB1	32.5762	32.5496	32.0274	32.5908	32.4717	32.041	0.022655	0.0165901
IPI00220219	COPB2	33.0264	32.943	32.5908	32.861	32.792	32.485	0.327798	0.140695
IPI00465132	COPE	26.592	26.9325	27.2985	26.8704	26.9137	27.157	0.0614106	-0.0393988
IPI00783982	COPG	32.5442	32.3554	32.112	32.6816	32.3693	32.1934	0.152634	-0.0775706
IPI00002557	COPG2	29.3988	29.2931	28.776	28.6931	28.8621	27.9665	0.902295	0.648729
IPI00018813	COPS2	31.7424	31.6044	31.5729	31.9709	31.9015	31.801	1.60536	-0.251249
IPI00025721	COPS3	31.0126	30.8874	31.4421	31.3237	31.2637	31.892	0.656709	-0.379108
IPI00171844	COPS4	32.0784	31.7136	31.8627	32.332	31.9709	32.0495	0.694974	-0.232532
IPI00009958	COPS5	31.3044	31.3916	31.3647	31.5672	31.7204	31.5343	1.8052	-0.253742
IPI00163230	COPS6	31.2529	31.1056	30.7391	32.0495	31.455	31.0588	0.68144	-0.488521
IPI00301419	COPS7A	30.0911	29.9987	29.7874	30.513	30.49	30.1785	1.43967	-0.434773
IPI00009301	COPS7B	26.7311	26.9791	27.153	27.0907	27.0813	27.4071	0.66507	-0.238604
IPI00009480	COPS8	27.8383	27.4337	25.5429	28.0532	27.6763	25.6624	0.0653254	-0.192304
IPI00032851	COPZ1	29.2947	29.0252	28.4075	29.3152	29.2003	28.4317	0.0669306	-0.0732867
IPI00009274	COPZ2	27.7616	28.2342	28.341	26.884	27.2684	27.3844	1.79101	0.933381
IPI00418414	COQ3	23.3423	24.2444	22.0817	20.5887	22.9222	20.0253	0.87618	2.04403
IPI00294469	COQ4	25.3984	25.2048	25.9412	25.4243	25.2345	24.7724	0.56133	0.371038
IPI00456965	COQ5	25.5429	26.1591	26.5578	24.2981	24.9794	25.3207	1.35409	1.22052
IPI00032633	COQ6	27.1706	27.1432	28.1902	25.6117	24.9671	27.0281	1.09736	1.63237
IPI00470631	COQ9	27.7305	29.0591	29.8802	27.6855	28.9572	29.4781	0.0784532	0.183
IPI00007058	CORO1B	31.5931	31.672	31.6176	30.5703	30.9894	30.8693	2.52716	0.817884
IPI00867509	CORO1C	31.2546	31.4647	31.0452	31.1056	31.2446	30.8874	0.477699	0.175652
IPI00027996	CORO7	25.6752	25.1139	26.0035	25.1085	24.9019	26.1107	0.188181	0.223845
IPI00017704	COTL1	28.7953	28.8711	29.1701	28.4151	28.3811	28.3671	2.07465	0.557727
IPI00295394	COX11	23.6425	24.4035	24.7245	23.4029	23.8418	24.4409	0.339975	0.361639
IPI00419869	COX15	27.3259	26.1498	27.4844	26.9304	25.8209	26.9807	0.292777	0.409375
IPI00218144	COX17	27.9284	28.3371	29.5287	26.9571	27.3853	28.4829	0.680507	0.989651
IPI00005740	COX4NB	28.2763	28.222	28.7166	28.0219	28.0817	28.4697	0.435631	0.213832
IPI00025086	COX5A	31.8778	32.1978	31.5672	31.0645	31.3573	30.8223	1.54294	0.799572
IPI00021785	COX5B	29.7563	30.0777	30.2626	28.9734	29.2143	29.4921	1.72854	0.8056
IPI00383598	COX6A1P2;COX6A1	32.112	31.942	32.2424	31.2392	31.0718	31.3679	2.69258	0.87249
IPI00797738	COX6B1	31.2599	30.9464	30.4755	30.5505	30.2531	29.8448	1.03943	0.677804
IPI00022421	COX7A2L	27.9093	27.3371	28.9852	27.4715	26.1925	28.4308	0.368473	0.712306
IPI00017601	CP	23.7352	23.4716	21.8728	22.9649	23.9232	22.365	0.0262724	-0.0578264
IPI00027078	CPD	29.1436	29.4505	29.7372	29.3412	28.5947	29.0186	0.765695	0.458937
IPI00031121	CPE	25.0156	24.802	26.0104	20.1725	20.3469	21.9454	2.56123	4.45441
IPI00375652	CPEB4	25.7599	25.6238	26.5326	24.5695	25.0744	25.5585	1.05738	0.904588
IPI00012759	CPLX2	23.1077	23.3175	24.2575	24.5817	23.4687	25.5869	0.627469	-0.984873
IPI00954006	CPNE1	28.7867	28.9451	29.0486	29.2525	29.4455	29.7159	1.61364	-0.544533
IPI00894409	CPNE1	31.0987	31.2847	31.0323	30.8104	31.0198	30.7799	1.18308	0.268551
IPI00645310	CPNE2	24.9717	22.0492	20.6786	24.8451	22.5321	21.0833	0.0521287	-0.253684
IPI00024403	CPNE3	30.0714	30.2071	29.8827	29.9291	29.9931	29.632	0.624916	0.202315
IPI00093057	CPOX	27.6864	27.7354	27.324	27.3176	27.2477	27.0414	1.15978	0.379712
IPI00026219	CPSF1	28.4103	28.5053	27.8974	28.6075	28.7305	28.0519	0.274127	-0.192331
IPI00419531	CPSF2	28.1362	27.528	27.6796	28.5675	27.8076	27.8641	0.416212	-0.298452
IPI00007818	CPSF3	29.0516	28.9353	28.5039	29.6575	29.625	29.1293	1.25902	-0.640341
IPI00063404	CPSF3L	25.9584	24.5477	22.6105	25.3556	24.9535	22.8085	8.12411e-05	-0.000312169
IPI00009137	CPSF4	29.1809	29.9322	29.8391	29.3293	30.0424	29.8634	0.106681	-0.0943286
IPI00030654	CPSF6	29.6556	30.1111	28.8117	30.0453	30.3822	29.1028	0.230396	-0.317294
IPI00915356	CPSF7	28.8597	29.2355	28.5861	29.4102	30.0747	29.2109	0.977444	-0.671431
IPI00032038	CPT1A	28.2536	28.396	28.474	27.034	27.0506	26.9894	4.44416	1.34987
IPI00021925	CPT1B	27.408	26.993	27.2366	25.8115	25.5391	25.7195	3.33758	1.52252
IPI00152358	CPT1C	19.895	20.0253	21.6656	19.4164	19.441	21.216	0.241191	0.504171
IPI00012912	CPT2	28.8412	28.662	29.6894	27.538	27.2793	28.1809	1.55179	1.39816
IPI00216088	CRABP2	29.1692	29.3152	29.3605	27.0517	26.9348	27.1756	4.79394	2.2276
IPI00016457	CRAT	27.956	27.912	27.1011	27.113	27.2226	26.3747	0.913416	0.75293
IPI00045917	CRBN	25.3653	24.09	26.2978	25.6981	23.2256	26.3037	0.0529998	0.17523
IPI00027713	CREB1	26.9367	26.8155	26.6223	27.307	27.1614	27.2808	1.96415	-0.458249
IPI00023339	CREBBP	27.9194	28.0083	27.9463	27.8231	28.1232	28.0624	0.17887	-0.0448513
IPI00794252	CRELD2	28.9998	29.5272	29.1215	29.1746	29.6738	29.1469	0.189032	-0.115606
IPI00215611	CRIP1	24.7044	24.5334	25.7352	23.7671	23.6266	24.7785	0.829068	0.933613
IPI00006034	CRIP2	32.1468	32.2126	31.9232	32.1529	32.2247	31.9363	0.0284175	-0.0104218
IPI00023080	CRIPT	26.5606	26.6682	26.8186	27.1697	27.3618	27.3511	2.48443	-0.611766
IPI00004838	CRK	29.81	29.5831	29.9804	29.4989	29.3823	29.6063	1.05127	0.29534
IPI00004839	CRKL	28.2494	28.3306	27.3576	28.7022	28.7389	27.7887	0.416541	-0.430703
IPI00295387	CRLF3	25.5087	23.9232	26.5078	27.9324	27.1962	28.7889	1.40493	-2.65929
IPI00177437	CRNKL1	25.5459	25.6517	23.7651	26.1844	26.2533	24.3465	0.279328	-0.607164
IPI00921172	CROT	26.6526	26.9571	26.5015	26.0051	26.4885	25.9359	1.20051	0.560542
IPI00451624	CRTAC1	30.4956	30.8081	30.1594	29.5384	29.8257	29.1409	1.64783	0.986023
IPI00748502	CRTAP	27.5533	28.7621	26.978	26.8074	28.2763	26.3457	0.325525	0.621328
IPI00783502	CRTC2	26.0586	24.8885	25.3193	26.4092	25.0156	25.6147	0.186083	-0.257718
IPI00216898	CRY2	23.8668	23.7298	24.9658	23.4149	23.3452	24.4673	0.345593	0.444982
IPI00000792	CRYZ	28.9776	28.7935	29.0265	28.6942	28.3209	28.5334	1.49105	0.416388
IPI00852997	CRYZL1	27.9863	28.8213	29.2981	28.1122	28.9852	29.4846	0.102954	-0.158784
IPI00025366	CS	33.3071	33.5653	33.2708	32.5999	32.8351	32.5496	2.30981	0.719504
IPI00002824	CS	28.9711	28.1732	28.4802	28.4904	27.5799	27.9235	0.702888	0.54359
IPI00925494	CSAD	22.2829	21.1743	23.4946	20.6138	19.8716	22.1987	0.673312	1.42256
IPI00031801	CSDA	28.9852	28.5222	28.9764	29.271	28.8006	29.263	0.57956	-0.283607
IPI00470891	CSDE1	31.7815	32.1685	32.117	32.2451	32.5391	32.513	1.25414	-0.410038
IPI00022744	CSE1L	32.5859	32.5442	32.3626	33.0752	33.1535	32.9208	2.33085	-0.552259
IPI00216738	CSGALNACT1	23.6899	23.9665	23.5613	23.1581	23.8843	22.8591	0.600583	0.438715
IPI00013212	CSK	29.1381	29.4921	29.512	29.0932	29.3568	29.3219	0.348404	0.123368
IPI00448798	CSNK1A1	28.0519	27.9131	27.8017	28.1331	27.9684	27.8017	0.140406	-0.045496
IPI00011102	CSNK1D	27.153	26.7739	27.4151	26.9701	26.5198	27.253	0.284242	0.199668
IPI00218437	CSNK1G3	24.0921	24.3291	23.9461	23.4357	23.3066	23.762	1.61869	0.62101
IPI00016613	CSNK2A1	32.2585	31.725	31.8803	32.2371	31.8464	31.8803	0.0571109	-0.0333417
IPI00020602	CSNK2A2	30.4591	30.767	30.5949	30.6114	30.8846	30.9389	0.690577	-0.204648
IPI00640088	CSNK2B	31.1441	30.7087	30.7882	31.1464	30.8609	30.8782	0.191989	-0.0814864
IPI00019157	CSPG4	27.2808	28.3596	28.9572	27.7213	28.6514	28.7732	0.111773	-0.182779
IPI00442073	CSRP1	31.2104	31.529	31.9252	30.4956	30.7147	31.2313	1.15944	0.740982
IPI00011528	CSTF1	28.7258	28.8014	28.5803	29.3863	29.5654	29.2597	2.50978	-0.701283
IPI00013256	CSTF2	30.0101	29.3418	29.4264	30.6133	29.8043	29.904	0.711742	-0.514427
IPI00015195	CSTF3	29.2574	29.0662	28.6404	29.625	29.7084	29.0328	0.768153	-0.467408
IPI00915443	CTAGE4	26.9265	27.2437	26.3493	26.8398	27.2597	26.1777	0.0689217	0.0807762
IPI00012835	CTBP1	29.8282	29.5165	30.2454	30.271	29.9537	30.6847	0.667126	-0.439765
IPI00450767	CTBP1	23.0302	22.5022	24.1588	22.8085	22.1888	23.8937	0.141639	0.266754
IPI00010136	CTBP2	28.8983	28.4286	28.7044	29.5436	29.1678	29.3921	1.77664	-0.690772
IPI00027988	CTCF	29.8634	29.3336	30.8032	30.5911	30.0534	31.2599	0.50109	-0.634757
IPI00410256	CTDP1	26.1955	21.8429	24.5114	26.3182	22.471	25.1035	0.0939456	-0.447629
IPI00009633	CTDSP1	24.7345	25.6048	24.1465	25.1381	24.4201	24.9288	0.000267778	-0.000389735
IPI00033054	CTDSPL2	25.1729	25.6733	25.912	26.1521	26.2378	26.7534	1.29593	-0.795038
IPI00215948	CTNNA1	28.6821	30.2504	28.2921	28.6149	30.3339	28.4103	0.0174141	-0.0448074
IPI00385055	CTNNA2	25.1557	24.6793	24.7088	25.1721	24.7205	24.7926	0.0798405	-0.0471255
IPI00179328	CTNNAL1	23.3066	22.1177	20.7676	20.8514	19.9407	20.0556	1.06328	1.7814
IPI00514012	CTNNBIP1	21.2229	21.3406	22.0948	21.932	21.9454	22.0232	0.686103	-0.414124
IPI00844214	CTNNBL1	28.6812	29.4603	28.3654	28.8633	29.6992	28.5814	0.171865	-0.212355
IPI00290142	CTPS	32.534	32.5167	32.8162	32.8974	32.8843	33.1937	1.23851	-0.369497
IPI00645702	CTPS2	27.4228	27.7035	27.4475	27.5318	27.6025	27.538	0.130429	-0.0328388
IPI00477468	CTR9	28.0032	27.8974	28.4308	28.3868	28.2548	28.4202	0.644275	-0.243514
IPI00295741	CTSB	26.8997	26.0243	24.0168	25.2669	24.7276	22.8058	0.53686	1.38014
IPI00011229	CTSD	29.2734	28.9764	26.2817	27.4825	27.8207	23.9311	0.491315	1.76578
IPI00002745	CTSZ	30.8081	31.3376	29.2804	30.2174	30.6882	28.5636	0.296655	0.652292
IPI00029601	CTTN	32.7112	32.7299	32.6236	31.9161	32.1371	32.1468	2.78649	0.621522
IPI00514311	CTTNBP2NL	27.8369	27.6802	27.6606	27.7749	27.5025	27.724	0.228959	0.0587629
IPI00062882	CTU1	24.8622	24.3709	25.2185	26.0243	25.5069	25.7599	1.52032	-0.946444
IPI00418412	CTU2	22.4013	22.3476	24.4349	23.4073	23.3355	25.329	0.435117	-0.962671
IPI00853009	CUGBP1	29.8827	30.0043	30.1403	30.2031	30.1375	30.5029	0.943985	-0.2721
IPI00845479	CUGBP2	30.9261	31.109	31.1219	31.9015	31.9854	32.2715	2.83173	-1.00044
IPI00014310	CUL1	29.6025	29.7577	29.566	30.1014	30.2919	29.901	1.63662	-0.456025
IPI00014311	CUL2	29.7041	29.4989	29.3293	29.9348	29.7019	29.566	0.662984	-0.223466
IPI00014312	CUL3	31.0087	31.1198	31.1656	31.0029	31.1814	31.1872	0.123472	-0.0257867
IPI00480142	CUL4B	29.8528	30.8104	31.0695	30.2362	31.3044	31.0029	0.215259	-0.270229
IPI00216003	CUL5	29.3043	29.9149	29.3219	29.4207	29.8216	29.5776	0.149202	-0.0929559
IPI00001690	CUL7	25.0627	24.577	25.098	24.992	25.3002	25.2069	0.593179	-0.25382
IPI00034319	CUTA	26.2198	25.0179	24.3621	25.4429	24.8639	23.8282	0.271558	0.488248
IPI00419894	CUX1	27.3371	27.7198	28.1843	27.7596	28.1362	28.5823	0.532153	-0.412302
IPI00009009	CWC15	28.3533	28.707	29.3892	27.9194	29.1609	29.3336	0.00724291	0.0118936
IPI00177381	CWC22	27.7555	27.6686	27.7333	28.5355	28.515	28.4892	4.95699	-0.794086
IPI00025174	CWC27	24.8654	24.5598	23.5931	24.8488	25.5048	23.7651	0.225539	-0.366829
IPI00101600	CWF19L1	25.7411	24.6	27.7166	26.1591	25.2018	27.6732	0.100728	-0.325489
IPI00019994	CXorf15	26.2601	27.0571	20.7057	26.0167	26.8186	20.9225	0.0107133	0.0883942
IPI00107104	CXorf26	28.4035	28.9481	27.95	29.0823	30.9353	31.0666	1.28625	-1.92752
IPI00152089	CXorf38	25.9387	25.6459	26.1665	26.6034	25.9259	26.5043	0.757494	-0.427516
IPI00005055	CXorf56	23.9215	24.9004	22.0096	24.3193	24.9094	22.5891	0.108191	-0.328797
IPI00641026	CXXC1	23.9757	22.5346	23.814	24.5583	23.0263	23.9556	0.252245	-0.405291
IPI00397860	CYB5A	29.5414	30.458	30.1026	29.0516	29.6505	29.5486	0.885599	0.617099
IPI00470674	CYB5R1	27.6713	27.7333	26.8469	27.4151	27.9207	27.0165	0.0291468	-0.0335789
IPI00954806	CYB5R3	31.5048	31.1957	30.271	30.3592	30.0368	29.1195	1.03103	1.15202
IPI00029264	CYC1	30.1271	29.901	28.3811	29.81	29.4934	27.8881	0.1923	0.405863
IPI00465315	CYCS	31.529	31.419	31.4156	30.8579	30.8177	30.7292	3.59577	0.652938
IPI00644231	CYFIP1	31.0609	31.0532	31.3618	31.1271	31.3066	31.7858	0.487582	-0.247862
IPI00719600	CYFIP2	25.3879	24.8778	23.4029	25.4299	25.0164	23.431	0.0274105	-0.0695508
IPI00103373	CYGB	26.4753	27.2793	24.0132	25.3823	26.3673	23.3792	0.266688	0.879673
IPI00889783	CYHR1	23.6314	23.5323	23.1052	23.7948	23.2358	23.164	0.0325363	0.0247358
IPI00106663	CYLD	24.1073	25.2002	24.4254	24.4819	25.4429	25.2785	0.484777	-0.490117
IPI00926253	CYP20A1	26.5845	27.2992	24.7587	26.8505	27.3047	24.8511	0.0385582	-0.121277
IPI00025307	CYP27A1	23.7233	23.5952	24.1663	20.2899	20.4543	20.9879	3.54768	3.25091
IPI00644258	CYP4B1	27.903	27.586	28.6363	28.5372	28.1348	29.265	0.594746	-0.603897
IPI00289171	CYP4F12	26.5531	25.0041	24.4296	28.0811	22.0977	21.1824	0.27445	1.54186
IPI00873788	CYP4F2	22.7283	22.0379	22.9067	19.7401	19.1713	20.7982	2.08431	2.65445
IPI00295772	CYP51A1	31.2374	31.3044	31.3237	30.8536	31.3746	31.4169	0.149651	0.0734965
IPI00478608	CYTH1	27.2305	27.8451	27.3452	25.9353	26.3951	26.0621	2.34538	1.34279
IPI00178072	CYTSA	26.6256	26.9273	26.6313	26.6265	26.7548	26.7637	0.04077	0.0130641
IPI00291032	CYTSB	26.0778	26.3686	26.4729	26.5394	26.1747	26.1879	0.0112906	0.00575129
IPI00219919	D	24.3541	22.9164	24.0066	24.9625	23.6893	25.1931	0.601344	-0.855942
IPI00166642	D2HGDH	23.332	25.7315	26.3632	23.3132	25.7762	27.0014	0.0535381	-0.221361
IPI00337800	DAAM1	22.3296	22.306	20.8384	20.9879	21.3249	19.441	0.747886	1.24006
IPI00179438	DAB2	27.7663	28.3061	28.2013	26.6807	27.1352	26.8398	2.32492	1.20601
IPI00789361	DAB2IP	28.467	28.2516	28.5222	28.7859	28.5454	28.8655	1.18173	-0.318654
IPI00009407	DAD1	30.1887	30.0224	30.458	29.793	29.76	30.0999	0.950551	0.338789
IPI00028911	DAG1	28.2065	27.6384	27.5722	27.6518	27.1364	27.3789	0.766027	0.416682
IPI00385987	DAGLB	21.3673	25.0901	22.0887	22.6412	25.329	22.1396	0.126497	-0.521252
IPI00551024	DAK	26.5198	25.4243	25.9567	26.4076	25.098	26.165	0.0515721	0.0767543
IPI00796700	DALRD3	22.1726	21.7208	20.9377	22.8734	22.5619	21.3465	0.479346	-0.650291
IPI00018117	DAP	33.9843	33.3432	34.222	33.3962	32.8902	33.8	0.585502	0.48769
IPI00018120	DAP3	27.134	26.8636	26.0813	27.6295	27.5835	27.1894	1.05422	-0.774463
IPI00015213	DAPK3	25.8334	25.9496	26.9753	25.6256	26.0255	27.0022	0.0213629	0.0350145
IPI00216951	DARS	33.0672	33.0899	33.3004	33.1226	33.1617	33.3333	0.20993	-0.0533587
IPI00100460	DARS2	28.7389	28.5553	29.5812	28.6253	28.6331	29.6443	0.00646196	-0.00911585
IPI00915456	DAXX	22.223	19.9407	23.4505	23.2434	18.6569	24.3106	0.0333095	-0.198882
IPI00165230	DAZAP1	30.2554	30.1248	30.8202	30.5001	30.2665	30.9526	0.231147	-0.172928
IPI00006115	DAZAP2	23.5323	23.1728	23.175	23.41	23.0429	22.8653	0.395712	0.187257
IPI00101968	DBNL	29.7848	29.7719	29.9028	29.005	29.0753	29.1995	3.30093	0.726599
IPI00305545	DBR1	26.3811	28.4745	27.6104	27.627	27.253	27.3689	0.0398384	0.072354
IPI00306642	DCAF13	26.5513	26.2499	25.5332	27.5624	27.1382	26.9116	1.42381	-1.09261
IPI00783277	DCAF5	26.4223	27.1246	26.7114	26.7441	26.6956	26.3493	0.261203	0.156427
IPI00006754	DCAF7	27.0693	27.7213	26.5818	27.2992	27.7983	26.9473	0.21075	-0.224123
IPI00290071	DCAF8	27.9043	27.2961	28.1232	27.7395	27.4554	28.3048	0.0578152	-0.0587514
IPI00291417	DCAKD	27.8268	28.6253	28.7294	28.0101	29.2611	29.2061	0.361905	-0.431906
IPI00433138	DCBLD2	22.0547	22.0921	23.3157	22.7693	22.7233	23.8434	0.492592	-0.62455
IPI00020454	DCK	25.567	26.3758	25.7105	25.7105	25.8317	26.1559	0.0175626	-0.0149326
IPI00004560	DCLK1	29.7859	29.1441	29.2402	28.9612	28.3533	28.3811	1.36881	0.824849
IPI00644293	DCLK1	21.101	21.2229	22.6477	21.0627	21.1944	22.5225	0.0316769	0.0639954
IPI00296360	DCLK2	25.7923	25.0482	24.933	27.7567	27.14	26.5341	1.88004	-1.88575
IPI00164672	DCP1A	24.7698	24.639	24.7438	25.192	24.7245	25.3067	0.912963	-0.356865
IPI00335385	DCPS	30.897	29.8901	30.8497	31.1139	30.1501	30.8177	0.124932	-0.148344
IPI00872359	DCTN1	31.1514	30.5625	31.0045	30.9833	30.8295	31.0718	0.104833	-0.0554543
IPI00220503	DCTN2	30.2963	30.6617	30.6882	30.5411	30.847	30.8295	0.520676	-0.190465
IPI00027014	DCTN3	28.0995	27.9554	28.5749	27.8671	28.0764	28.7605	0.0252661	-0.0247707
IPI00550852	DCTN4	28.9497	28.8997	29.2741	29.2003	29.0291	29.4053	0.459676	-0.170363
IPI00032498	DCTN5	25.685	25.2591	25.8401	25.8975	25.4405	25.8901	0.255408	-0.147973
IPI00220770	DCTN6	27.5785	28.1105	24.2807	27.5025	28.269	24.5449	0.0234075	-0.115584
IPI00012197	DCTPP1	26.8023	26.7841	28.0544	26.9944	27.5785	28.707	0.345526	-0.54637
IPI00291893	DCUN1D1	27.7501	28.1998	28.0202	27.9583	28.2984	28.1005	0.32363	-0.129046
IPI00165361	DCUN1D5	25.4941	26.1844	26.5829	26.6714	27.0887	27.4131	1.18918	-0.970606
IPI00031563	DDA1	25.6183	25.2386	25.8115	25.9916	25.3736	25.715	0.21763	-0.137271
IPI00000760	DDAH2	28.1088	27.6119	28.7585	26.8723	26.5865	27.3371	1.43615	1.22779
IPI00293464	DDB1;LOC100290337	32.1934	32.3626	31.892	32.3626	32.4412	32.2549	0.618697	-0.203564
IPI00871731	DDHD2	25.6806	25.715	26.3614	25.9286	26.0544	26.6439	0.391571	-0.289987
IPI00031618	DDI2	25.5738	27.1136	23.9782	26.267	27.576	24.7373	0.201393	-0.63824
IPI00297084	DDOST	31.8968	31.8561	31.4467	31.5931	31.5672	31.1722	0.661408	0.289086
IPI00004409	DDR2	22.7063	25.8647	26.406	23.6731	26.3223	26.6067	0.134514	-0.541681
IPI00293655	DDX1	33.0966	33.3184	32.9812	33.0476	33.3004	33.0194	0.0239887	0.0095609
IPI00297900	DDX10	24.5975	25.1789	25.4528	24.8756	25.5928	26.1059	0.440349	-0.448357
IPI00940000	DDX17	32.4232	32.3162	32.2808	32.3901	32.3077	32.2585	0.136837	0.0213165
IPI00301323	DDX18	28.5266	28.269	28.6964	29.8043	29.5095	30.0823	2.48679	-1.30138
IPI00019918	DDX19A	31.0103	30.2294	30.3519	30.3907	30.4447	30.6548	0.0452474	0.0338306
IPI00005904	DDX20	27.6894	27.7058	27.1382	28.0863	28.3589	27.824	1.1237	-0.578629
IPI00015953	DDX21	30.9997	30.8343	30.5703	32.4525	32.2939	32.0323	2.94508	-1.45817
IPI00006725	DDX23	30.516	30.4527	30.3079	30.6882	30.5956	30.5175	1.04138	-0.174928
IPI00006987	DDX24	28.7859	27.8017	28.0764	28.6657	27.7663	28.4075	0.0506618	-0.0585194
IPI00296139	DDX25	26.4478	27.1614	27.3966	26.8446	27.4948	27.7204	0.380822	-0.351322
IPI00293078	DDX27	28.6911	28.7867	27.9534	29.259	29.4869	28.959	1.17056	-0.757913
IPI00043990	DDX31	26.1316	24.9094	22.678	25.599	25.4893	23.3116	0.062801	-0.226967
IPI00940237	DDX39	30.4527	30.9144	29.6516	30.9609	31.2455	30.2454	0.431236	-0.477698
IPI00215637	DDX3X	33.614	33.8	33.7374	33.7879	33.8884	33.8486	0.93932	-0.124479
IPI00007208	DDX41	27.8732	28.5787	28.8496	28.5553	28.5039	28.5574	0.132595	-0.105024
IPI00409671	DDX42	29.7633	29.6731	29.2124	29.9707	29.9895	29.8463	1.02687	-0.38589
IPI00329791	DDX46	20.6589	20.7266	22.3462	21.9454	21.9541	23.2189	0.745542	-1.12892
IPI00939523	DDX46	30.7292	30.6756	30.9735	31.078	30.7612	30.9997	0.508619	-0.153557
IPI00023972	DDX47	26.6408	27.8231	26.1384	27.6796	28.0288	27.3037	0.673454	-0.803244
IPI00003739	DDX49	24.2837	23.821	24.161	25.496	24.3757	25.0179	1.16563	-0.87464
IPI00017617	DDX5	33.9333	33.9843	33.69	34.2955	34.2955	34.0062	1.17126	-0.329901
IPI00031554	DDX50	27.371	27.9437	28.3533	28.1041	28.6113	29.0753	0.81972	-0.707569
IPI00217541	DDX51	23.7185	21.4001	21.8273	24.0535	22.4863	22.2829	0.277583	-0.62559
IPI00032423	DDX52	25.7617	26.1806	24.2347	26.8498	27.2319	25.144	0.510122	-1.01623
IPI00152510	DDX54	27.0639	27.0727	27.0693	27.4454	27.4512	27.6072	2.9097	-0.432632
IPI00185361	DDX55	22.7972	22.7928	23.9603	23.4415	23.3643	24.4911	0.474616	-0.582146
IPI00302281	DDX56	27.1352	28.5814	28.396	28.5574	29.2541	29.1144	0.869841	-0.937791
IPI00654731	DDX58	22.3476	22.9769	25.7943	20.9377	20.0977	25.8436	0.27209	1.41326
IPI00030320	DDX6	31.2016	30.9047	31.3263	31.5642	31.3679	31.7783	1.1625	-0.425912
IPI00922655	DE	23.8333	23.2962	23.5019	23.6768	23.2209	23.5232	0.124664	0.0701644
IPI00004924	DEF6	24.4018	24.5504	22.6739	25.2542	25.8091	24.1179	0.690487	-1.18502
IPI00020021	DEK	29.0759	29.2124	29.1713	29.6399	29.6575	29.5639	3.15144	-0.467272
IPI00641666	DENND2D	21.2724	21.3871	19.8113	22.8653	22.7876	20.7057	0.676291	-1.29597
IPI00921122	DENND4A	25.2956	24.7767	26.3015	24.647	23.9414	25.6806	0.44711	0.7016
IPI00847759	DENND4B	24.277	24.6539	24.8673	23.6215	24.4983	24.0053	0.843714	0.557716
IPI00746398	DENND4C	24.941	26.9278	27.0081	24.2285	26.2464	26.3932	0.276741	0.66961
IPI00426066	DEPDC5	26.3374	25.6484	26.0716	26.2899	25.2591	26.0944	0.136015	0.137996
IPI00290560	DEPDC6	28.0106	27.5598	27.627	26.5818	25.8423	26.1747	2.40881	1.53288
IPI00219677	DERA	25.0118	25.0156	21.8884	24.9658	25.2908	22.0379	0.0288962	-0.126197
IPI00013271	DERL1	27.6921	29.0031	28.7732	27.2636	28.7859	28.5142	0.186027	0.301572
IPI00304264	DERL2	25.8479	26.7059	26.2843	25.9431	26.8385	26.4341	0.128959	-0.125856
IPI00029656	DFNA5	23.9584	24.1465	25.0252	23.3228	23.5727	24.3757	0.607792	0.619672
IPI00015799	DGAT1	24.8807	24.2186	24.3434	23.583	23.3574	23.4702	2.04353	1.01073
IPI00165970	DGCR8	20.877	22.7233	23.4665	22.1396	23.4931	23.8548	0.361922	-0.806903
IPI00003293	DGKE	26.1559	24.5271	23.5902	25.7862	24.1011	23.2518	0.131584	0.378024
IPI00294501	DHCR7	28.4781	28.4394	28.8891	27.9711	27.7913	28.2187	1.48476	0.608509
IPI00024462	DHODH	31.6486	25.844	27.4201	31.3044	25.7195	26.7972	0.0513662	0.363839
IPI00026829	DHPS	27.9151	27.4948	27.4686	28.6891	28.3512	28.2929	1.89859	-0.818224
IPI00065063	DHRS1	29.5732	29.5776	30.2047	28.5392	28.7699	29.0281	1.78472	1.00607
IPI00059955	DHRS13	25.4243	25.4847	27.287	25.6183	25.7886	27.1555	0.0538825	-0.122138
IPI00376377	DHRS2	27.7333	27.8663	28.1022	27.0138	27.1312	27.3664	2.08845	0.730108
IPI00106913	DHRS4	26.8808	26.4401	27.9508	27.0556	26.7904	27.8717	0.0959537	-0.148649
IPI00470418	DHRS7	29.9098	28.8067	29.7464	28.0185	27.0005	28.1849	1.5921	1.75301
IPI00550165	DHRS7B	26.6215	26.6265	27.1432	26.6188	26.8074	27.3886	0.186445	-0.141167
IPI00396435	DHX15	32.0997	32.041	32.1856	32.3424	32.2874	32.4138	1.89545	-0.239126
IPI00297178	DHX16	27.0374	27.4715	27.0919	27.3672	27.5272	27.3641	0.678692	-0.219226
IPI00217413	DHX29	30.332	30.0021	29.6658	30.1396	30.194	29.867	0.111546	-0.0669117
IPI00926109	DHX30	28.9179	29.0753	28.8448	29.3418	29.6017	29.3052	1.81809	-0.47025
IPI00644447	DHX32	25.0325	22.3192	21.5022	24.4241	21.6641	20.9013	0.153689	0.621473
IPI00302860	DHX33	23.4589	24.3621	24.0921	24.8557	25.9159	25.6117	1.64421	-1.49002
IPI00030288	DHX35	23.4653	22.9706	23.905	23.7508	23.6905	24.6457	0.640357	-0.58202
IPI00027415	DHX36	29.1367	28.6956	28.8196	29.4589	29.1144	29.2911	1.15367	-0.404167
IPI00217630	DHX37	27.3727	26.8023	27.9293	28.4989	28.0059	29.0212	1.22351	-1.14055
IPI00294211	DHX38	26.3596	29.3102	26.5419	27.2464	27.324	27.0669	0.0699053	0.191413
IPI00410110	DHX4	20.4845	20.5887	22.2067	20.7388	20.8947	22.2935	0.104257	-0.215703
IPI00168885	DHX57	22.1273	22.1348	23.3524	22.5346	22.4959	23.6467	0.253329	-0.354262
IPI00303746	DHX58	24.9544	23.6467	19.7401	20.5301	23.7388	20.1569	0.269978	1.30513
IPI00031508	DHX8	23.3574	24.8322	24.2254	23.7966	25.2219	24.4845	0.240849	-0.362676
IPI00844578	DHX9	32.5534	32.5832	31.9854	32.7209	32.6711	32.0086	0.111829	-0.0928758
IPI00008418	DIABLO	23.2484	22.9067	25.9183	22.0379	23.2484	26.0167	0.0587012	0.256794
IPI00852685	DIAPH1	27.5799	27.9043	27.7955	27.3886	27.7725	27.5351	0.591384	0.19451
IPI00789805	DIAPH3	24.161	24.7627	24.0083	24.2837	24.4845	25.1557	0.399701	-0.330641
IPI00219036	DICER1	22.94	23.6804	23.0222	23.5293	23.4716	23.1617	0.265691	-0.173325
IPI00619921	DIDO1	24.4219	22.3607	20.5729	25.1067	23.258	21.3534	0.194709	-0.787517
IPI00004459	DIMT1L	26.0937	25.7078	26.0894	26.8047	26.9443	26.8592	2.59962	-0.905745
IPI00654865	DIP2A	26.9348	26.3774	26.3457	27.0297	26.5302	26.5513	0.236394	-0.151084
IPI00465045	DIP2B	26.3004	27.9695	27.4618	27.007	28.2032	27.6199	0.239301	-0.366126
IPI00032087	DIP2C	27.9994	27.8554	27.9761	28.261	28.146	28.146	1.82549	-0.240698
IPI00746351	DIS3	29.1802	28.9886	29.3703	29.869	29.8609	30.2125	2.1286	-0.801087
IPI00880048	DIS3L2	23.4249	22.94	25.4323	24.7276	23.3116	26.0402	0.27895	-0.760731
IPI00221394	DKC1	30.7147	30.6377	30.9423	31.2121	31.0666	31.445	1.53471	-0.476308
IPI00386243	DKFZp761E198	18.8706	19.0845	21.0391	20.0253	20.3106	21.8796	0.525296	-1.07378
IPI00021338	DLAT	32.3865	31.7539	31.9625	31.7839	31.1056	31.2121	1.11619	0.667095
IPI00015911	DLD	34.2131	34.0654	34.0798	33.4507	33.3286	33.5472	2.99693	0.677246
IPI00218729	DLG1	29.8504	29.987	30.2362	29.3955	29.5573	29.6438	1.66792	0.492361
IPI00220581	DLGAP4	26.3686	27.5015	28.1331	26.662	27.6629	28.1516	0.0823849	-0.157788
IPI00647892	DLGAP5	25.7195	25.9033	28.4954	26.7961	26.8669	29.4878	0.330347	-1.01085
IPI00420108	DLST;DLSTP	31.117	31.2446	30.5723	30.5297	30.6084	29.9651	0.989928	0.610209
IPI00294728	DMXL1	28.6699	28.8355	28.8633	27.8442	27.9931	28.0059	3.34459	0.841821
IPI00012535	DNAJA1	31.1464	31.1498	31.0826	31.5191	31.5011	31.4619	3.73535	-0.367732
IPI00032406	DNAJA2	30.889	31.2928	31.5662	31.3886	31.7839	32.0642	0.828428	-0.496235
IPI00294610	DNAJA3	28.1659	27.8689	26.8356	26.9389	27.0878	27.007	0.687146	0.612272
IPI00015947	DNAJB1	29.3605	29.3921	28.653	29.515	29.6063	28.6677	0.121449	-0.12779
IPI00008454	DNAJB11	32.3977	32.4881	31.672	31.9815	32.0591	31.3171	0.499967	0.400024
IPI00939657	DNAJB12	28.6891	28.6331	29.3529	29.2443	29.1215	29.873	0.727565	-0.521213
IPI00178504	DNAJB14	21.0955	21.1944	25.8209	21.7838	21.7993	24.418	0.00672292	0.0366224
IPI00220102	DNAJB2	24.4278	23.7757	25.5174	24.0762	23.7397	25.1248	0.147194	0.260097
IPI00003848	DNAJB4	26.5935	27.219	26.1153	26.0222	26.3391	25.4041	0.789755	0.720812
IPI00024523	DNAJB6	25.6238	25.666	25.7973	25.7279	25.7291	25.844	0.47672	-0.0713158
IPI00074870	DNAJC1	27.3349	26.432	26.0118	26.5811	25.6272	25.1531	0.633384	0.805761
IPI00293260	DNAJC10	31.5883	31.5374	32.1571	30.9871	30.8009	31.5729	0.981778	0.640658
IPI00465290	DNAJC11	26.7863	28.2297	28.3453	26.8648	27.7002	26.79	0.504148	0.668789
IPI00307259	DNAJC13	30.3477	30.8831	30.5368	30.557	30.7707	30.7488	0.237183	-0.102968
IPI00006433	DNAJC16	23.4149	23.7388	23.2434	23.0222	23.4653	23.3827	0.369301	0.175638
IPI00018798	DNAJC17	22.7473	22.8695	16.8398	23.8185	23.6132	18.097	0.138502	-1.02402
IPI00304306	DNAJC19	27.4498	26.5643	27.4454	27.7166	26.4392	26.9451	0.089741	0.119532
IPI00830108	DNAJC2	30.9696	31.2637	31.4684	31.2181	31.4421	31.6393	0.453999	-0.199226
IPI00413366	DNAJC21	27.565	27.3618	27.6316	28.1932	28.0129	28.2946	2.3019	-0.647463
IPI00027909	DNAJC25	25.6272	26.3445	26.7311	25.5057	25.8259	26.154	0.4703	0.405715
IPI00006713	DNAJC3	28.6595	28.1809	27.6763	28.707	28.2669	27.801	0.0786052	-0.0860926
IPI00402231	DNAJC5	30.5565	30.8497	30.9997	30.0195	30.3097	30.5565	1.1763	0.506701
IPI00184119	DNAJC6	25.5687	24.9207	26.5747	25.163	25.381	26.1925	0.0662954	0.109189
IPI00329629	DNAJC7	28.5817	28.5517	28.8949	29.854	29.7911	30.0911	3.00888	-1.23596
IPI00003438	DNAJC8	30.4021	30.4591	30.4527	30.8343	30.7955	30.8948	3.536	-0.403559
IPI00154975	DNAJC9	23.9937	22.4401	23.6197	24.718	23.5814	24.9144	0.775522	-1.05339
IPI00027761	DNAL1	23.4889	23.3962	24.5951	23.21	23.139	24.2583	0.213806	0.29095
IPI00413140	DNM1	25.1661	24.5807	21.4239	24.7785	24.3413	21.0176	0.0726878	0.344479
IPI00235412	DNM1L	31.2433	30.9971	31.1597	31.1303	30.8636	30.9047	0.692231	0.167198
IPI00181352	DNM2	32.0086	31.9076	32.1397	31.5729	31.3986	31.6419	2.08445	0.480849
IPI00514550	DNM2	24.6078	24.2061	23.5952	25.1986	24.8807	23.9757	0.51158	-0.548623
IPI00218889	DNM2	26.8529	26.1972	24.5695	26.2198	25.6083	24.2347	0.226158	0.518909
IPI00174025	DNMBP	23.8508	23.7153	22.3388	24.4766	24.3231	22.3476	0.188879	-0.414117
IPI00031519	DNMT1	28.8006	28.53	28.4759	30.0589	30.0143	29.9529	3.74498	-1.4065
IPI00329216	DNMT3A	25.4925	26.3103	26.2068	25.7226	26.2352	26.1423	0.0338369	-0.030206
IPI00658215	DNPEP	29.423	29.616	29.9434	28.9764	29.22	29.4733	0.981655	0.437538
IPI00057097	DNTTIP1	24.6736	25.5057	26.6108	24.9839	25.6694	26.6532	0.0820754	-0.172105
IPI00290410	DNTTIP2	22.8058	23.3594	23.0671	24.1393	24.4018	23.6783	1.70223	-0.995683
IPI00872808	DOCK1	27.6581	28.2669	27.4323	27.7523	28.362	27.557	0.1088	-0.104671
IPI00784294	DOCK4	24.9747	24.0431	24.0307	24.1465	23.9287	22.4013	0.60851	0.857348
IPI00792788	DOCK5	25.3838	25.1892	23.4839	25.0421	24.9086	23.2669	0.123094	0.279772
IPI00513791	DOCK7	30.8214	31.2058	30.764	30.7955	30.9997	30.9155	0.0618212	0.026858
IPI00171856	DOHH	24.3898	25.496	27.0753	24.9671	25.6103	27.2416	0.0993753	-0.285971
IPI00015287	DOK1	25.1085	25.0407	21.694	25.9599	25.8458	22.425	0.188138	-0.795816
IPI00294653	DOPEY2	26.8773	28.0893	28.4697	26.1695	27.8162	28.2288	0.197966	0.407274
IPI00023322	DPF2	27.7213	27.3494	26.9865	28.3061	27.9324	27.2256	0.543465	-0.468955
IPI00908772	DPH1	22.5619	22.3523	21.101	23.2358	23.3949	21.7676	0.503262	-0.794331
IPI00103884	DPH1	24.6922	24.7146	24.2199	24.2101	24.9544	23.8966	0.206717	0.188559
IPI00375824	DPH5	21.8273	21.9416	22.5304	23.0055	23.3021	23.4625	1.97407	-1.15692
IPI00796864	DPM1	28.8621	28.8465	28.8237	28.8911	28.6865	28.932	0.0333877	0.0075868
IPI00020672	DPP3	31.0666	30.9894	31.3886	31.1334	31.1139	31.6149	0.273064	-0.139212
IPI00045840	DPP3;BBS1	20.5301	23.3452	22.2633	20.3575	21.7743	22.0299	0.272008	0.658988
IPI00296141	DPP7	18.1768	18.1768	20.2397	17.8719	18.1768	19.7647	0.103501	0.259961
IPI00940180	DPP9	28.8876	28.7809	27.9242	28.8738	28.7786	28.2113	0.0871039	-0.0903867
IPI00924944	DPY19L1	25.4764	27.1169	26.4777	24.7741	26.5707	25.8209	0.377188	0.635105
IPI00028109	DPY30	30.12	29.2212	27.8671	30.7919	31.036	28.5902	0.453471	-1.06995
IPI00257508	DPYSL2	33.7076	33.4263	32.854	33.3432	33.171	32.6236	0.355256	0.283354
IPI00029111	DPYSL3	26.8592	26.4365	24.6898	26.5903	26.3058	24.7165	0.0482165	0.12431
IPI00008991	DR1	28.9438	27.7965	28.4048	28.7389	27.6894	28.1998	0.142289	0.172359
IPI00477494	DRAP1	27.0252	27.1782	26.4244	27.0036	27.2669	26.4471	0.0301813	-0.0299142
IPI00031836	DRG1	31.0695	31.2154	31.1464	31.2818	31.4716	31.3154	1.37633	-0.212493
IPI00022697	DRG2	30.1396	29.8368	29.3376	30.9526	30.2454	29.7834	0.603363	-0.555779
IPI00298946	DSCR3	28.2844	27.4115	28.5541	27.8913	26.9865	28.2432	0.300422	0.376316
IPI00642259	DST	29.9269	29.4869	29.9232	30.3121	29.4733	30.2867	0.322561	-0.245056
IPI00473014	DSTN	32.8162	32.7814	32.6201	32.0086	31.9315	31.8756	3.4374	0.800707
IPI00152692	DTD1	27.2826	25.6403	27.7853	27.912	26.0462	28.2635	0.206413	-0.504491
IPI00000845	DTNA	22.1888	22.2185	21.2724	22.9693	23.6839	21.7208	0.618692	-0.898111
IPI00299362	DTNB	28.3683	28.9852	27.5321	28.1715	28.8237	27.2331	0.128711	0.219118
IPI00479571	DTNBP1	24.2903	23.814	23.1581	24.2686	23.9172	23.6215	0.183211	-0.181594
IPI00013862	DTYMK	25.2785	26.4825	24.9207	25.4764	27.0727	24.6096	0.064162	-0.159019
IPI00299627	DUOX2	23.2312	23.8548	20.6896	23.4434	23.1934	20.9377	0.0177612	0.06703
IPI00015804	DUS2L	25.4912	25.6272	26.0077	25.8317	26.314	26.5219	0.937581	-0.513849
IPI00784107	DUS3L	27.9057	28.2811	28.9285	28.7205	28.9914	29.2797	0.856027	-0.625411
IPI00009210	DUSP12	25.2498	26.0937	26.9944	26.0265	26.7139	27.4825	0.40615	-0.628326
IPI00306353	DUSP23	24.6219	24.4584	22.2292	23.9414	23.7837	21.6358	0.238675	0.649534
IPI00790757	DUSP3	25.8601	25.912	26.9367	26.0158	25.8465	26.7158	0.0334594	0.0435975
IPI00013679	DUT	28.8833	28.4802	28.445	29.6838	29.1976	29.1381	1.52698	-0.737004
IPI00023100	DVL1	24.0053	23.8418	23.3495	22.8863	22.8085	23.3753	1.25473	0.708838
IPI00023103	DVL2	26.0748	26.3505	26.2709	26.8099	26.8534	26.5747	1.90216	-0.513964
IPI00643141	DVL3	24.7321	25.3028	26.0265	24.3465	24.6879	25.8615	0.261455	0.388463
IPI00296211	DYM	27.2712	27.0313	26.4557	27.4648	26.4753	26.0158	0.211062	0.267441
IPI00456969	DYNC1H1	35.3118	35.3526	35.1115	35.2739	35.4026	35.1234	0.024525	-0.00804774
IPI00744015	DYNC1I2	30.3242	30.9353	30.3368	30.386	30.8526	30.3477	0.00419477	0.00331752
IPI00007675	DYNC1LI1	31.8433	31.4716	31.2217	31.9363	31.5662	31.38	0.18001	-0.115291
IPI00011592	DYNC1LI2	28.0571	28.4528	27.5624	28.094	28.4989	27.7865	0.112436	-0.102353
IPI00465426	DYNC2LI1	23.549	23.4434	24.6464	23.8054	23.6695	24.8322	0.156998	-0.222837
IPI00019329	DYNLL1	30.2031	31.0403	30.4546	30.1691	31.0609	30.6882	0.0717414	-0.0733776
IPI00062037	DYNLL2	29.224	28.9142	28.9527	28.8067	28.4929	28.477	1.4076	0.438112
IPI00412497	DYNLRB1	30.1098	29.2676	29.3962	30.0696	29.4624	29.6948	0.181962	-0.151026
IPI00019495	DYNLT1	30.0195	29.8772	29.8911	30.2999	30.2404	30.0453	1.38961	-0.265919
IPI00014344	DYRK1A	25.7031	25.5585	26.8498	26.4633	26.0586	27.2676	0.443833	-0.559348
IPI00890779	DYSF	27.8207	26.4076	27.8268	28.3636	26.5159	28.2714	0.182001	-0.365283
IPI00654777	E	31.0291	31.0087	30.6816	31.6012	31.6984	31.3329	1.81538	-0.637744
IPI00300584	E	24.6031	24.8689	23.9082	24.473	24.616	23.6266	0.202979	0.221544
IPI00384707	EARS2	24.1311	24.1582	23.816	24.4018	24.5778	23.7871	0.34675	-0.220477
IPI00329425	EBF1	26.5829	26.3564	28.0571	27.2902	27.3013	28.7646	0.470663	-0.786573
IPI00930241	EBNA1BP2	27.2731	27.453	27.1645	28.2494	27.7567	28.3087	1.85018	-0.808062
IPI00913873	ECD	19.1713	16.8398	21.1545	20.3923	18.7081	22.0464	0.34956	-1.32707
IPI00002478	ECE1	29.3635	28.8237	29.6134	29.2981	29.0591	29.7445	0.118828	-0.100346
IPI00302688	ECHDC1	28.8521	29.3516	25.5356	29.3635	30.0021	25.2908	0.0555203	-0.305702
IPI00384676	ECHDC2	27.4282	28.1975	28.0608	27.0588	27.7116	27.8759	0.431094	0.346767
IPI00256376	ECHDC3	25.7912	25.2669	24.3106	25.5391	24.7165	24.2777	0.186717	0.278479
IPI00024993	ECHS1	29.7804	30.0561	30.889	29.0718	29.4053	30.1679	0.677428	0.693488
IPI00106506	ECSIT	26.5663	26.1288	25.7874	26.0735	26.0104	25.7541	0.365304	0.21484
IPI00794284	ECT2	20.4331	20.5139	22.1665	20.7165	20.8514	22.2528	0.114313	-0.235705
IPI00018009	EDC3	25.9135	25.4228	26.1681	26.7817	25.5842	26.6596	0.505536	-0.507051
IPI00376317	EDC4	29.9764	30.0332	29.9149	30.3242	30.2979	30.1375	1.8345	-0.278371
IPI00306178	EDEM2	22.0735	22.1046	23.2933	22.0735	22.1177	21.6232	0.569112	0.552335
IPI00009410	EDEM3	25.7226	26.3838	26.1591	25.3796	26.0051	25.7379	0.64837	0.380941
IPI00021570	EDF1	29.6779	30.3368	29.6827	30.2227	30.8223	30.2419	0.835143	-0.529832
IPI00022525	EDG2	23.9287	23.7671	25.005	24.7146	24.5711	25.7617	0.655325	-0.782214
IPI00329536	EEA1	30.5839	30.5749	30.121	30.6002	30.6034	30.067	0.00426198	0.00305748
IPI00432040	EED	28.9142	28.7099	29.1569	29.6443	29.4405	30.0246	1.65039	-0.776132
IPI00472724	EEF1A1;EEF1AL3	19.3444	19.3802	21.2229	20.1173	20.3319	21.932	0.407902	-0.811272
IPI00014424	EEF1A2	25.677	25.9007	26.547	26.5865	26.7158	27.4902	1.08803	-0.889256
IPI00178440	EEF1B2	30.5462	31.1367	30.2999	31.419	31.8843	31.0609	1.08423	-0.793774
IPI00642971	EEF1D	33.0508	33.0833	33.171	33.3004	33.2942	33.3124	2.28185	-0.200631
IPI00937615	EEF1G;TUT1	34.4272	34.4637	34.252	34.8224	34.7047	34.5052	1.22892	-0.296486
IPI00186290	EEF2	35.8564	35.8075	35.9252	36.1436	36.1436	36.2152	2.72974	-0.304426
IPI00011689	EEF2K	24.7252	23.3355	25.5087	24.2512	23.4273	25.1466	0.111462	0.248158
IPI00028050	EEFSEC	29.2061	29.2804	29.5384	29.3043	29.4542	29.6134	0.358075	-0.115669
IPI00029658	EFEM	27.4424	26.7071	27.238	25.6288	25.0206	26.1591	1.742	1.52637
IPI00556657	EFEMP2	23.1769	24.8756	23.3091	23.1098	24.557	23.5952	0.015909	0.0331898
IPI00060181	EFHD2	29.2463	28.8876	29.4078	29.2689	29.0198	29.3659	0.0710959	-0.0375862
IPI00024307	EFNB1	26.1472	25.1834	25.3567	25.9947	25.243	24.9495	0.143866	0.16667
IPI00470711	EFR3A	22.0893	22.0343	21.2033	20.0556	20.6289	17.7505	1.16762	2.29729
IPI00293026	EFTUD1	29.3459	29.0186	29.0951	28.9601	28.5345	28.9489	0.923071	0.338662
IPI00003519	EFTUD2	31.9875	31.8694	32.1978	32.2424	32.1613	32.4464	0.969136	-0.265083
IPI00004928	EGLN1	26.9571	26.7676	27.8554	24.2223	24.0762	25.2498	2.23489	2.67729
IPI00296421	EHBP1L1	25.7291	25.74	24.5735	25.2716	25.246	24.3315	0.330784	0.397854
IPI00017184	EHD1	31.919	31.6867	31.4619	31.8379	31.7176	31.4035	0.0683733	0.0361977
IPI00100980	EHD2	31.101	31.4584	31.0403	30.4645	30.7242	30.3289	1.78379	0.694022
IPI00005578	EHD4	30.2531	29.8802	30.8648	30.5462	29.8901	29.9964	0.207277	0.188472
IPI00946054	EHMT1	24.3912	23.7871	21.2477	25.1869	24.8673	22.1461	0.271844	-0.924733
IPI00096972	EHMT2	22.9067	25.6917	25.5032	23.9617	26.5073	25.6288	0.222271	-0.665409
IPI00015077	EIF1	31.2306	31.2165	30.2802	31.9854	31.8352	31.0087	0.734634	-0.700644
IPI00298618	EIF1AD	27.3861	28.0817	28.0255	28.068	28.6418	28.7675	1.00058	-0.661353
IPI00232533	EIF1AXP1;EIF1AX	30.0999	30.0159	29.0582	30.5534	30.6515	29.5499	0.470277	-0.526937
IPI00031489	EIF1B	23.83	21.4691	24.9049	24.7502	23.2716	25.7943	0.408524	-1.20401
IPI00012462	EIF2A	28.886	28.6865	28.869	29.3476	29.0977	29.1367	1.71248	-0.380203
IPI00303053	EIF2AK3	23.3664	23.2933	24.1136	23.0963	23.0009	24.1233	0.155017	0.184312
IPI00163851	EIF2AK4	24.1117	23.9493	25.2197	23.7537	23.6164	24.7686	0.284334	0.380643
IPI00221300	EIF2B1	28.5675	28.6353	28.6178	29.1167	29.3516	29.2143	3.02231	-0.620642
IPI00028083	EIF2B2	28.5773	28.7015	27.9994	29.0265	29.0186	28.2657	0.445048	-0.344192
IPI00006504	EIF2B3	28.3978	28.6404	26.0649	28.9028	29.0362	26.5884	0.155463	-0.474756
IPI00220232	EIF2B4	28.4829	27.9904	28.7552	28.7935	28.2823	29.0805	0.405543	-0.309268
IPI00011898	EIF2B5	28.1105	28.0414	28.5012	28.515	28.1895	28.7333	0.54185	-0.261536
IPI00745433	EIF2C2	29.76	29.7099	29.3659	29.7099	30.1862	29.5955	0.425868	-0.218614
IPI00219678	EIF2S1	33.0194	33.171	32.8713	33.0264	33.2169	32.9384	0.122398	-0.0399793
IPI00021728	EIF2S2	30.7955	30.5653	30.8055	31.0103	30.7381	30.901	0.654168	-0.16107
IPI00297982	EIF2S3	33.3498	33.5963	33.7772	33.1319	33.3124	33.4507	0.828548	0.276096
IPI00029012	EIF3A	33.4969	33.5758	33.4263	33.8589	33.8589	33.7374	2.23978	-0.318759
IPI00719752	EIF3B	32.97	32.513	32.4232	33.3559	32.9852	32.8351	0.857813	-0.423317
IPI00646839	EIF3CL;EIF3C	32.9852	33.0752	32.4983	33.228	33.3962	32.848	0.558851	-0.304499
IPI00006181	EIF3D	32.513	32.1397	32.0591	32.8238	32.4552	32.4272	0.809656	-0.331484
IPI00013068	EIF3E	32.3272	32.148	31.9815	32.7112	32.5442	32.3865	1.3488	-0.39503
IPI00290460	EIF3G	30.2919	30.4956	29.9353	30.8713	30.9144	30.5386	1.23949	-0.533813
IPI00647650	EIF3H	31.6526	31.8602	31.3916	32.1313	32.2549	31.7972	1.04023	-0.426392
IPI00012795	EIF3I	32.5167	32.485	31.6012	33.0555	32.9654	32.3663	0.737273	-0.594727
IPI00290461	EIF3J	29.8026	29.9895	29.5165	30.5723	30.6548	30.1989	1.64011	-0.705774
IPI00033143	EIF3K	30.8511	31.0588	31.3044	31.3016	31.2217	31.5782	0.805489	-0.295728
IPI00465233	EIF3L	32.3827	32.2305	32.5762	32.2206	32.2626	32.5908	0.0888434	0.038475
IPI00102069	EIF3M	29.9134	29.632	29.4279	30.5476	30.1574	29.9931	1.24717	-0.574905
IPI00409717	EIF4A2	27.8527	28.8633	28.146	27.8108	27.6489	27.8781	0.759048	0.508048
IPI00009328	EIF4A3	32.0666	31.9583	32.0218	32.5859	32.5534	32.6071	4.06554	-0.566504
IPI00942600	EIF4B	32.1898	32.2585	32.788	32.534	32.6565	33.1788	0.620784	-0.377672
IPI00908416	EIF4E	30.6617	30.6325	31.0432	31.0126	31.0926	31.419	1.02304	-0.395586
IPI00744211	EIF4E2	27.0087	27.9898	27.7155	26.9048	27.9904	27.4323	0.108669	0.128853
IPI00783667	EIF4E3	27.2743	22.8293	28.2657	27.0639	24.2223	28.1497	0.0604026	-0.355556
IPI00002570	EIF4EBP2	24.356	24.213	25.473	24.5271	24.3634	25.5258	0.0818252	-0.124807
IPI00291800	EIF4ENIF1	25.8624	23.2993	21.4914	23.06	24.0849	22.6146	0.0782798	0.297856
IPI00479262	EIF4G1	31.8284	31.9315	31.6665	32.1664	32.2527	32.0377	1.58845	-0.343466
IPI00925413	EIF4G1	22.4401	22.3918	23.6369	22.9023	22.8191	23.9782	0.30197	-0.410273
IPI00941589	EIF4G2	31.2731	31.2365	31.6685	32.0129	32.0149	32.3077	1.8785	-0.719107
IPI00411710	EIF4G3	26.417	26.0621	27.2935	26.0649	25.4005	26.9367	0.32592	0.456774
IPI00646377	EIF4G3	28.226	28.2113	28.2647	28.1659	28.3339	28.2984	0.235343	-0.0320517
IPI00014263	EIF4H	30.1065	30.2108	29.7774	30.4804	30.5476	30.0195	0.683963	-0.317604
IPI00022648	EIF5	30.9816	30.9423	30.6472	31.6176	31.6486	31.3506	2.06687	-0.681904
IPI00376005	EIF5A	34.0654	34.1799	33.911	34.2307	34.4058	34.1183	0.807288	-0.199525
IPI00299254	EIF5B	31.0588	30.9192	31.1245	31.2731	31.1872	31.3844	1.38669	-0.247356
IPI00010105	EIF6	30.6277	30.3167	29.9203	30.7047	30.5213	30.0043	0.155544	-0.121826
IPI00396627	ELAC2	27.4244	28.0426	27.7434	27.841	28.3271	28.0472	0.668129	-0.334963
IPI00301936	ELAVL1	30.9192	31.0126	31.5109	31.2564	31.4342	31.8304	0.650028	-0.359476
IPI00396265	ELF2	24.3425	21.965	23.639	23.9082	23.3307	25.0041	0.373418	-0.765519
IPI00023467	ELL	22.9222	24.0276	24.0762	23.3245	24.1508	24.3789	0.21717	-0.276038
IPI00219532	ELMO1	25.1381	25.4912	25.9708	25.2703	26.1369	26.3312	0.395143	-0.379445
IPI00260090	ELMO2	28.2013	28.2083	28.2883	28.0746	27.835	28.362	0.386318	0.142092
IPI00645469	ELOF1	26.4442	26.1205	25.6752	27.1456	26.6869	26.2542	0.838941	-0.615592
IPI00910962	ELOVL5	21.3042	22.4639	21.9102	22.0151	23.21	22.1348	0.480859	-0.560523
IPI00642369	ELP2	27.374	27.5182	27.4773	28.1772	28.2157	27.8974	2.37554	-0.640249
IPI00165477	ELP3	28.4075	28.857	28.4528	29.2338	29.5717	28.9418	1.36615	-0.676687
IPI00061376	ELP4	25.4986	25.7175	25.2861	25.7825	26.2412	25.677	0.871573	-0.399474
IPI00032003	EMD	28.7552	29.0139	29.1059	28.4981	28.8448	28.7619	0.800988	0.256733
IPI00025347	EMG1	25.7805	24.9378	25.234	27.0246	26.2923	26.3951	1.68983	-1.25323
IPI00013079	EMILIN1	27.3745	27.6104	28.0041	27.1799	27.2935	27.3618	0.941027	0.3846
IPI00012510	EMILIN2	24.933	24.0867	22.6089	24.9004	24.4562	22.9649	0.0918399	-0.23099
IPI00550611	EML1	29.4468	29.4434	29.22	29.3068	29.0918	28.8496	0.88104	0.287296
IPI00852659	EML3	28.3846	27.9151	27.4874	27.6941	27.7584	27.7166	0.325813	0.205957
IPI00001466	EML4	28.6677	29.195	29.195	28.9438	28.6126	29.3854	0.0463898	0.0385895
IPI00465248	ENO1	35.9555	35.9252	36.0586	35.6587	35.6587	35.6118	2.83123	0.336698
IPI00216171	ENO2	31.6207	31.7424	30.5956	31.3573	31.4684	30.3519	0.196884	0.260337
IPI00218474	ENO3	34.6525	34.555	34.555	34.1046	34.1319	34.0592	3.64034	0.488931
IPI00038378	ENOPH1	25.0494	25.0865	24.6872	25.5633	25.7368	25.6932	2.20277	-0.723378
IPI00011994	ENPP5	27.4454	27.0648	28.068	25.4986	25.4719	26.3406	1.89744	1.75569
IPI00410177	ENSA	30.0183	30.1362	30.8782	29.9809	30.1014	30.5723	0.14439	0.126027
IPI00024620	ENY2	29.0168	28.9179	28.7249	29.2993	29.1995	29.0392	1.20304	-0.292824
IPI00020985	EP300	22.9286	20.6709	23.7082	23.4687	21.4506	24.2313	0.190992	-0.614335
IPI00167535	EP400	21.2033	23.555	22.2829	22.3607	24.6922	22.6616	0.373849	-0.891093
IPI00003921	EPB41	28.892	28.9572	28.5877	29.0076	28.8213	28.4719	0.0827024	0.0453498
IPI00024062	EPB41L1	31.1914	30.7462	31.2016	30.7782	30.3538	30.8831	0.782867	0.37467
IPI00015973	EPB41L2	29.8971	30.5576	30.5386	30.1026	30.3794	30.6301	0.0513264	-0.0395978
IPI00376221	EPB41L5	24.8607	24.6497	24.2956	23.3827	23.3157	22.9576	2.5517	1.38335
IPI00021267	EPHA2	30.0424	30.3199	30.0951	30.5327	30.1817	30.0634	0.25829	-0.106838
IPI00289329	EPHB3	24.2223	24.8706	23.9866	25.2345	25.0522	24.4099	0.672457	-0.539048
IPI00289342	EPHB4	22.1528	22.1726	20.6289	21.6641	21.6756	20.3106	0.252437	0.434676
IPI00009896	EPHX1	28.7015	28.9464	28.3371	27.7155	28.0478	27.4115	1.67047	0.936768
IPI00419721	EPM2AIP1	24.2313	22.8058	22.5859	23.8799	23.2765	21.4914	0.135782	0.325065
IPI00647389	EPN1	24.2512	25.1253	25.7617	24.5449	27.308	24.843	0.204877	-0.51924
IPI00397381	EPN2	27.67	27.9986	26.9389	27.0788	28.0101	26.4986	0.249265	0.340001
IPI00010951	EPPK1	26.1244	25.337	24.0535	26.154	25.1818	24.0066	0.0221592	0.0574786
IPI00013452	EPRS	33.0899	32.9068	33.1032	33.3376	33.2233	33.3962	1.61082	-0.285661
IPI00292134	EPS15	28.0764	28.7732	26.8954	27.5615	28.222	26.6569	0.241046	0.434879
IPI00163849	EPS15L1	28.2083	28.2187	27.1259	28.0213	28.6956	27.1444	0.0618331	-0.102795
IPI00290337	EPS8	28.1146	28.1849	27.2284	28.8448	28.8891	27.8465	0.677313	-0.684201
IPI00414315	EPS8L2	26.7427	26.7127	26.4005	26.7127	26.3712	26.6154	0.128352	0.0522277
IPI00026512	ERAL1	24.8176	23.5401	25.2498	25.0595	24.6736	25.0818	0.309793	-0.402444
IPI00165949	ERAP1	25.6319	25.2929	24.7386	28.4178	27.8881	25.5756	1.0698	-2.07272
IPI00438286	ERBB2IP	25.715	25.8551	26.4899	25.6606	25.5801	26.2023	0.266715	0.205678
IPI00216719	ERC1	29.4921	29.3776	28.7904	29.0281	29.1844	28.9601	0.288977	0.162498
IPI00747053	ERCC3	20.5518	24.4059	23.2128	22.8191	25.1067	23.4229	0.327913	-1.05942
IPI00219179	ERCC4	23.2669	23.2241	23.0894	24.2313	24.0815	23.3594	1.19437	-0.697291
IPI00552569	ERCC6L	25.1976	25.5391	26.1719	25.7874	26.6265	27.2319	0.835044	-0.912416
IPI00022887	ERGIC1	31.8153	31.9015	32.5197	31.3746	31.5191	32.0906	0.59992	0.417415
IPI00165651	ERGIC2	26.3212	26.8047	27.1799	26.0489	26.8808	27.0241	0.107894	0.117301
IPI00446875	ERGIC3	25.6632	27.3727	27.7395	25.63	27.0919	27.4424	0.085256	0.203709
IPI00029631	ERH	30.8609	30.9326	30.188	31.1514	31.1722	30.4851	0.349619	-0.275693
IPI00216873	ERI1	26.2023	27.3474	26.0798	27.2648	28.0839	26.4633	0.51663	-0.727486
IPI00020701	ERI3	27.95	27.0527	27.3871	27.9268	26.8023	27.4187	0.0674526	0.0806878
IPI00748151	ERLEC1	26.9253	26.4137	27.4368	26.2083	25.565	26.9348	0.628482	0.689224
IPI00007940	ERLIN1	26.4615	25.5869	26.4121	27.2973	26.0845	26.9979	0.622587	-0.639684
IPI00026942	ERLIN2	31.2564	31.0553	30.8295	30.4882	30.4119	30.5703	1.87565	0.556965
IPI00257903	ERMP1	29.3823	29.2318	28.9293	29.0734	28.9065	28.5191	0.756924	0.348107
IPI00015974	ERN1	24.6887	24.5215	25.7175	23.9508	23.7948	24.9625	0.637766	0.739865
IPI00386755	ERO1L	32.0549	31.6984	31.109	31.5771	31.286	30.7462	0.495435	0.417705
IPI00429633	ERO1LB	24.802	26.2458	25.6554	23.9172	25.4883	25.1764	0.482207	0.707127
IPI00024911	ERP29	29.5287	29.2382	28.7502	29.9764	29.6797	29.1535	0.580363	-0.43082
IPI00401264	ERP44	31.5983	31.7024	31.4389	31.0291	31.2954	31.0148	1.76227	0.466789
IPI00411706	ESD	28.8911	28.389	28.9464	28.776	28.0083	28.5392	0.44977	0.300964
IPI00024167	ESF1	26.2187	26.4753	27.4131	27.1603	27.371	28.261	0.838127	-0.895077
IPI00022143	ESYT1	31.3301	31.2673	30.948	30.9155	30.897	30.4285	1.02874	0.4348
IPI00953221	ESYT2	31.2446	31.3506	31.1872	30.5386	30.6745	30.4681	3.08735	0.700381
IPI00429191	ETF1	31.7361	31.4787	31.2493	31.9076	31.6526	31.557	0.549556	-0.21768
IPI00010810	ETFA	32.7441	32.3214	32.2765	31.9749	31.4253	31.5299	1.63324	0.803966
IPI00556451	ETFB	31.3402	31.5502	31.9512	30.586	30.6688	31.0513	1.67465	0.845175
IPI00032875	ETFDH	29.9353	29.9434	30.0043	28.1529	28.6471	28.5675	3.20377	1.50513
IPI00003766	ETHE1	30.0297	29.9804	30.4476	29.7674	29.6481	30.0368	0.828213	0.335144
IPI00013159	ETV6	22.8947	24.2825	18.2786	23.7786	24.7613	19.895	0.158782	-0.993026
IPI00029661	EVI5	24.9262	24.6965	25.9073	25.4535	25.0421	25.9781	0.274696	-0.314583
IPI00930364	EVI5L	22.0026	21.4757	21.6309	22.2206	21.4914	20.8625	0.158171	0.178236
IPI00009841	EWSR1	30.0688	29.9458	29.9253	30.6688	30.5434	30.8636	2.63238	-0.711962
IPI00465113	EXD2	24.8728	25.7725	25.6238	24.3484	24.5695	25.0932	0.99318	0.752659
IPI00019427	EXOC1	27.5712	27.9836	28.4329	27.4356	27.9534	28.0295	0.240488	0.18973
IPI00783559	EXOC2	28.5053	28.6418	28.5675	28.5066	28.3741	28.192	1.01041	0.213975
IPI00157734	EXOC3	28.5902	28.6979	28.2382	28.3103	28.3937	27.8597	0.673413	0.320835
IPI00059279	EXOC4	28.1375	27.8801	26.3335	27.9877	27.724	25.9025	0.102153	0.245611
IPI00719051	EXOC5	27.6104	27.7725	26.993	27.2031	27.2018	26.5277	0.667041	0.481102
IPI00852806	EXOC6B	27.9583	28.106	28.023	27.634	27.7784	27.7317	2.19026	0.314403
IPI00103064	EXOC7	28.7249	27.5776	27.7144	28.3654	27.1259	27.668	0.218433	0.28584
IPI00028264	EXOC8	27.2127	27.7799	28.303	27.0362	27.1982	28.3488	0.173054	0.237425
IPI00032823	EXOSC1	26.9689	26.9637	26.8943	27.8268	27.6119	27.7555	3.51164	-0.78911
IPI00009464	EXOSC10	27.6835	27.8952	27.5466	28.5039	28.7889	28.2049	1.79928	-0.790787
IPI00015905	EXOSC2	27.4874	26.7657	26.0389	28.4528	27.8732	26.8047	0.672539	-0.946226
IPI00015956	EXOSC3	24.5045	25.6183	23.7397	25.2326	26.4696	24.624	0.460872	-0.821287
IPI00745613	EXOSC4	26.7212	27.0753	26.8723	27.6915	27.8936	27.7434	2.75901	-0.886578
IPI00644775	EXOSC5	26.3982	23.4811	23.6545	27.1204	24.3898	24.6776	0.277352	-0.884706
IPI00073602	EXOSC6	25.974	26.4866	27.1716	27	27.157	28.0716	0.833369	-0.865482
IPI00014198	EXOSC7	28.5814	28.303	26.9791	29.3988	28.8633	27.9863	0.546458	-0.794969
IPI00552920	EXOSC8	27.4356	27.7434	27.7965	28.5966	28.9542	28.9717	2.68609	-1.18233
IPI00029697	EXOSC9	24.8689	26.6034	25.3487	25.7696	26.9969	25.4272	0.259082	-0.457593
IPI00293128	EXT1	22.6477	22.6198	19.5016	22.365	22.3502	19.6024	0.0366709	0.150493
IPI00942173	EXT2	24.2484	24.8931	25.3612	23.6233	24.631	24.6659	0.488689	0.527465
IPI00015135	EXTL3	26.3335	25.3781	25.5819	26.3625	25.7126	25.381	0.0452527	-0.0541922
IPI00015990	EYA3	26.2533	26.1059	25.151	27.1587	26.7212	25.8343	0.636202	-0.734695
IPI00376787	EZH2	25.9319	25.1661	25.7226	26.7841	26.3973	26.5184	1.70274	-0.959741
IPI00843975	EZR	30.7919	30.7551	30.8734	30.1065	30.0951	30.5576	1.62103	0.553755
IPI00554521	F	32.3901	32.4631	32.8273	31.6665	31.7972	32.208	1.46618	0.66957
IPI00374018	FA	24.0083	25.4429	26.0365	22.6842	24.0325	25.0421	0.612723	1.24296
IPI00215746	FABP4	32.1202	32.1073	31.8778	29.8577	29.7971	29.5343	4.27074	2.30539
IPI00007797	FABP5;FABP5L2;FABP5L7;FABP5L9	26.993	28.7044	27.9986	26.8902	28.3061	27.7155	0.151373	0.261415
IPI00784651	FADS1	27.5272	27.3966	27.2826	27.7629	27.4686	27.4304	0.527863	-0.151829
IPI00028040	FADS3	22.7417	22.8591	24.9717	21.6232	21.9416	24.8057	0.231295	0.733941
IPI00070643	FAF1	30.2684	29.6894	30.5469	30.294	29.733	30.5559	0.0249284	-0.026083
IPI00172656	FAF2	30.3138	30.0453	29.7199	30.6745	30.271	30.4476	0.989025	-0.438044
IPI00031708	FAH	28.5334	27.4631	28.6956	28.6821	28.0505	29.131	0.321875	-0.390493
IPI00604759	FAHD1	25.7441	25.6163	25.8694	24.8941	24.8311	25.2219	2.23848	0.760878
IPI00301994	FAHD2B	25.8851	24.7926	23.791	24.4409	23.7064	23.1148	0.678204	1.06888
IPI00394989	FAIM	24.931	27.0075	27.0907	24.3291	26.8735	27.0543	0.0805303	0.25738
IPI00792344	FAM104A	23.412	22.9376	25.2253	23.5197	23.1004	25.3755	0.0487045	-0.140225
IPI00004563	FAM105A	21.9712	21.6232	20.9781	21.0509	20.877	20.2068	0.980551	0.812585
IPI00101734	FAM105B	27.453	28.3785	26.2514	27.3853	28.3967	26.7001	0.0583862	-0.133063
IPI00027799	FAM107B	25.7754	26.4161	25.9172	26.2748	26.4777	25.9183	0.299666	-0.187356
IPI00643071	FAM108B1	26.4557	25.7563	26.1901	26.0758	25.1518	25.5703	0.728747	0.534719
IPI00828172	FAM114	27.3871	27.6448	27.0487	27.6593	27.7832	27.5943	0.813846	-0.318756
IPI00031670	FAM114A1	27.2856	28.0255	27.8936	27.0102	27.627	27.2793	0.673418	0.42939
IPI00783877	FAM115D;FAM115C	22.6993	21.8068	21.1678	20.4845	20.0776	20.2256	1.62052	1.62871
IPI00291723	FAM116A	24.0431	24.9558	22.0893	23.737	24.4969	22.2903	0.0612613	0.187986
IPI00304214	FAM118A	22.8734	23.2746	22.6373	23.4005	23.0516	22.7928	0.235088	-0.153204
IPI00002240	FAM118B	26.2542	26.1133	23.0702	25.9977	25.8401	23.7214	0.0104914	-0.0404809
IPI00384265	FAM120A	31.0513	31.5048	31.6083	30.8032	31.101	31.4156	0.49993	0.281529
IPI00394751	FAM120C	28.515	27.9508	29.6188	28.5454	28.2751	29.1656	0.0196412	0.0328191
IPI00102291	FAM126A	21.7583	21.9191	23.0732	23.0822	21.1318	24.1465	0.213699	-0.536617
IPI00328350	FAM129A	30.1257	31.0645	31.3389	29.9098	30.7574	31.1209	0.183343	0.247
IPI00647286	FAM129B	28.3768	28.7022	28.5246	27.8076	28.2049	27.8936	1.68052	0.565865
IPI00167696	FAM133A	27.0907	28.6392	29.1856	26.9655	28.5574	29.2382	0.0185807	0.0514291
IPI00303722	FAM136A	28.6865	28.6427	28.7518	28.6956	28.5657	28.7653	0.0975211	0.0181179
IPI00149375	FAM160A2	23.0009	21.7993	22.1273	22.2087	21.7583	21.4312	0.529968	0.509742
IPI00289031	FAM160B1	26.3312	26.7487	22.5969	26.3951	26.7264	22.8346	0.0170232	-0.0930678
IPI00329753	FAM164A	27.466	27.903	27.8511	26.2378	26.8505	27.2305	1.40658	0.967066
IPI00022028	FAM168A	26.8783	25.5848	27.4062	26.2756	25.6733	27.4862	0.0664419	0.144747
IPI00030384	FAM175A	25.2971	25.559	26.2826	25.3567	25.6403	26.1261	0.00459558	0.0052007
IPI00299517	FAM175B	28.2187	28.6021	29.3193	28.2921	28.6223	29.2931	0.0170606	-0.0224457
IPI00748891	FAM177A1	26.2553	26.5543	27.1352	26.0748	26.5483	26.9596	0.121239	0.120726
IPI00884910	FAM185A	23.5904	23.8483	24.8405	22.9576	23.1784	23.9838	0.662334	0.719791
IPI00549993	FAM188A	26.3774	27.2354	25.5048	25.9039	26.5224	25.0164	0.349049	0.558263
IPI00917259	FAM188B	26.6625	26.4114	26.3642	24.6898	24.3386	24.631	3.75839	1.92621
IPI00101298	FAM18B2	24.3144	24.5154	25.5376	24.3695	24.161	24.9794	0.251065	0.285831
IPI00746221	FAM195B	26.8328	26.9833	26.405	27.2005	27.4115	25.9548	0.0838676	-0.115211
IPI00006657	FAM20B	21.7676	21.5799	23.0798	20.5021	21.3042	22.1177	0.557685	0.834408
IPI00792422	FAM21A	25.4647	25.5376	24.7741	25.2317	25.3796	24.4201	0.256579	0.248354
IPI00022402	FAM32A	24.7872	24.5951	25.8016	24.9436	24.802	25.9841	0.126184	-0.181936
IPI00917650	FAM38A	23.6215	26.2627	26.7071	23.4736	26.6917	27.0178	0.045387	-0.197261
IPI00642723	FAM3A	21.3406	22.2087	22.0921	21.7543	22.0615	22.0977	0.112188	-0.0907091
IPI00334282	FAM3C	26.5184	27.8465	28.3016	27.3511	28.4954	28.7699	0.398974	-0.649911
IPI00549766	FAM40A	28.7786	29.1249	28.094	28.6119	28.9683	28.0811	0.101202	0.112047
IPI00020529	FAM45B	27.4773	27.3756	27.1905	27.2961	27.185	27.1364	0.668364	0.141973
IPI00946738	FAM48A	23.7043	23.5814	24.7785	22.8973	22.8162	23.9734	0.6757	0.792421
IPI00303318	FAM49B	28.8722	28.5988	28.2584	29.0362	28.7585	28.4023	0.24072	-0.155881
IPI00030098	FAM50A	30.6985	30.6914	31.2446	30.8368	30.7488	31.3346	0.135946	-0.0952435
IPI00071826	FAM54B	28.4719	27.9293	28.7188	27.5899	27.1152	27.9324	1.17041	0.827495
IPI00292905	FAM63A	23.5665	23.4589	24.6659	23.2189	23.153	24.2807	0.259537	0.346234
IPI00641076	FAM65A	24.7438	27.6093	28.2836	24.5528	27.4244	28.1529	0.0370673	0.168882
IPI00029099	FAM69A	25.1166	26.2601	27.1516	24.624	25.5607	25.9862	0.478324	0.785817
IPI00926724	FAM73B	23.6851	25.4542	20.1173	24.2199	24.9808	20.8722	0.0462219	-0.272139
IPI00552849	FAM76B	20.4721	21.233	25.1789	21.4823	22.1224	25.7226	0.15484	-0.814432
IPI00410079	FAM82A2	26.7776	26.8629	28.0083	27.1041	27.0275	28.4629	0.198068	-0.315236
IPI00166855	FAM89B	23.8819	23.7233	24.977	24.8706	22.5969	25.9172	0.0901378	-0.267492
IPI00008285	FAM8A1	21.8943	21.9134	23.1784	20.9626	21.0864	22.4401	0.583762	0.832322
IPI00152671	FAM91A1	28.4735	28.1153	28.0219	28.0356	27.5152	27.5318	1.09194	0.509381
IPI00030985	FAM96A	21.7993	22.5259	21.6468	22.3345	22.8825	22.3562	0.754703	-0.533767
IPI00007024	FAM96B	29.632	29.7848	29.5639	29.6304	29.7834	29.271	0.234552	0.098671
IPI00174442	FAM98A	28.5372	29.2541	29.5886	28.6404	29.4143	29.5755	0.0687889	-0.0834096
IPI00760837	FAM98B	27.9931	27.8143	28.3252	28.1728	27.9612	28.5266	0.324578	-0.175983
IPI00306518	FANCI	20.3923	20.4721	22.1461	22.2789	22.3152	23.4819	1.14257	-1.68853
IPI00478838	FAR1	30.1047	30.3769	30.4851	29.7633	29.7149	29.7804	2.11231	0.569354
IPI00744221	FARP2	22.1619	22.1744	23.3909	22.4465	22.4401	23.577	0.166474	-0.245457
IPI00909657	FARSA	30.6601	30.2836	30.2112	30.7521	29.9688	29.9134	0.222424	0.173531
IPI00300074	FARSB	30.4778	30.5583	30.624	30.5213	30.586	30.5066	0.114623	0.0154057
IPI00026781	FASN	31.5119	31.8433	31.0513	32.112	32.5093	31.7839	1.00518	-0.666264
IPI00031411	FAT1	23.814	24.088	24.8908	23.577	24.125	24.6272	0.127928	0.154541
IPI00019770	FAU	30.7242	31.0666	30.7936	31.2637	31.6807	31.3551	1.59731	-0.571686
IPI00025039	FBL	32.7354	32.5908	32.3214	32.3663	32.3554	32.2424	0.827541	0.227833
IPI00291238	FBLIM1	26.6434	27.6894	28.2137	25.1531	26.0908	26.6975	1.1208	1.53504
IPI00235647	FBLL1	28.3512	28.7305	25.3115	28.4829	28.9451	25.8601	0.0722598	-0.298316
IPI00465038	FBLN2	26.3614	26.1982	25.2446	23.6868	23.5613	23.667	2.5522	2.29637
IPI00328113	FBN1	30.9047	31.3573	31.751	30.0061	30.463	30.8497	1.22195	0.898074
IPI00793661	FBXL15	24.6776	25.5356	22.306	25.1661	25.5087	22.7417	0.0812442	-0.299095
IPI00386731	FBXL18	22.1987	23.4053	23.41	21.1944	23.9025	22.6813	0.177634	0.411928
IPI00174757	FBXL20	22.0232	22.0735	23.3066	21.1465	21.2724	22.6056	0.560487	0.792968
IPI00164336	FBXL3	22.5259	22.4732	23.7017	23.6314	23.5123	24.6755	0.888434	-1.03947
IPI00069507	FBXO21	24.4349	24.2807	24.1539	23.6266	23.5089	23.5905	2.89533	0.714505
IPI00183208	FBXO22;FBXO22OS	24.1703	24.8363	25.0595	25.2197	25.1391	25.985	0.935584	-0.75926
IPI00008542	FBXO28	25.0369	24.3083	23.0367	24.4509	23.3792	22.2789	0.369875	0.757603
IPI00296789	FBXO3	24.7989	24.6046	25.8135	28.6199	28.3978	29.449	2.79582	-3.74989
IPI00290571	FBXO30	24.4254	24.1073	24.6583	24.616	24.3193	25.1166	0.435716	-0.286978
IPI00328603	FBXO33	24.3434	24.3581	26.2412	23.9838	24.2362	25.6694	0.160776	0.351125
IPI00456676	FBXO38	24.5665	22.3388	25.2309	25.234	22.2357	24.3709	0.0264518	0.0985018
IPI00073357	FBXO4	25.3357	25.1114	26.1439	25.9483	25.3612	26.3908	0.355618	-0.369766
IPI00011371	FBXO42	22.2206	22.2206	23.4474	21.4132	21.4757	22.8591	0.499082	0.713568
IPI00174438	FBXO45	25.1667	24.473	25.1869	24.8383	24.7649	24.8488	0.204178	0.124884
IPI00427242	FCF1	26.4958	25.8777	27.1323	27.1022	26.4005	27.7073	0.470262	-0.568073
IPI00472794	FCHO2	26.0514	27.2506	25.9094	25.8465	26.8534	25.9483	0.129475	0.187676
IPI00910791	FCHSD2	25.3626	22.3462	23.711	24.3253	21.6232	23.8245	0.172589	0.548932
IPI00914566	FDPS	29.9253	30.2588	29.2513	30.5625	30.8497	29.984	0.770498	-0.653578
IPI00440693	FDX1L	18.5677	18.7935	20.7797	18.9655	19.2139	20.8384	0.116001	-0.292267
IPI00911050	FDXR	29.1469	29.9707	28.5411	28.2642	28.5246	27.5505	1.02595	1.10646
IPI00554589	FECH	28.6979	28.497	28.4475	27.8781	27.7616	27.5927	2.68728	0.803331
IPI00026215	FEN1	29.9617	29.9203	29.0198	30.5988	30.5787	29.7099	0.712098	-0.661873
IPI00029263	FER	24.6272	25.7973	25.6694	22.9693	24.6793	24.046	1.10926	1.46644
IPI00913848	FERMT2	29.4455	29.6672	29.2458	29.8463	30.0494	29.5287	0.849142	-0.355279
IPI00006098	FEZ2	23.1098	25.4764	21.4642	23.3495	24.4642	21.3146	0.072553	0.3074
IPI00024312	FGD1	21.8884	22.8947	24.2484	22.2067	22.8258	23.5597	0.0647044	0.146417
IPI00384357	FGD3	24.2537	22.6616	22.4779	23.8717	23.3091	22.7737	0.104188	-0.187143
IPI00014903	FGFR1OP2	23.3524	23.2823	23.7449	22.5446	22.5022	23.1018	1.43551	0.743654
IPI00479683	FGGY	25.7175	26.3354	23.6058	24.3434	27.2144	22.1046	0.145999	0.665435
IPI00296053	FH	32.2339	31.9678	30.979	31.7204	31.4169	30.4778	0.415508	0.521851
IPI00014399	FHL3	29.636	29.6111	30.3996	29.381	29.3529	30.294	0.196672	0.2063
IPI00001730	FHOD1	28.3488	28.1331	28.391	27.8807	27.9293	27.8562	2.08294	0.402225
IPI00012443	FIBP	24.5215	24.3757	24.2686	24.0223	23.8819	24.4533	0.65199	0.269412
IPI00297578	FILIP1L	26.9865	27.5272	28.4496	27.0766	28.0213	28.7353	0.170497	-0.28995
IPI00008449	FIP1L1	28.2342	27.9711	27.634	28.8851	28.5699	28.497	1.54163	-0.70423
IPI00007052	FIS1	29.4165	29.1844	29.2947	28.9042	28.6718	28.8019	2.2237	0.505852
IPI00374076	FITM2	23.905	25.486	23.737	23.2784	25.2309	22.7321	0.267156	0.628873
IPI00045801	FIZ1	21.5614	22.2829	22.8973	22.2682	23.1967	23.4767	0.620272	-0.733299
IPI00303300	FKBP10	28.3039	28.2823	28.5082	28.5321	28.4357	28.6075	0.851394	-0.160298
IPI00791084	FKBP11	29.5717	29.9192	29.1106	29.636	30.092	29.2429	0.133767	-0.123151
IPI00017331	FKBP14	22.4369	22.3876	23.6314	20.6953	20.8384	22.7524	0.828263	1.38994
IPI00853400	FKBP15	26.658	26.813	26.2404	26.7863	26.8723	26.4223	0.218302	-0.123172
IPI00413778	FKBP1A	33.2106	33.0264	33.0752	33.4348	33.2391	33.2734	1.21758	-0.211732
IPI00738246	FKBP1C	31.7176	31.3489	31.7667	31.8881	31.6851	31.9769	0.690134	-0.23895
IPI00002535	FKBP2	31.1334	30.8526	31.5542	31.3618	31.2026	31.942	0.458072	-0.322065
IPI00024157	FKBP3	31.0645	30.9871	30.6337	30.9696	30.9293	30.474	0.192933	0.104136
IPI00219005	FKBP4	31.4619	31.6083	31.4915	32.5197	32.5797	32.4072	3.88681	-0.981648
IPI00218775	FKBP5	28.3937	29.5181	30.0143	28.8997	29.9098	30.4956	0.276095	-0.459678
IPI00001914	FKBP7	29.0252	27.8717	28.2182	28.3209	26.9621	27.7675	0.588817	0.688186
IPI00640341	FKBP8	28.4759	28.5838	29.2493	28.3428	27.9151	28.0213	1.16172	0.676654
IPI00182126	FKBP9	28.763	28.8448	28.6119	28.5803	28.776	28.5602	0.448727	0.101073
IPI00220299	FLAD1	23.4767	24.7989	23.7757	22.3562	23.6233	23.2391	0.794965	0.944222
IPI00031023	FLII	30.8948	31.1872	30.6934	31.109	31.3171	30.9924	0.552087	-0.214376
IPI00790107	FLJ10357	24.2937	25.3067	25.6117	24.4121	25.5288	25.4145	0.0301536	-0.0477835
IPI00645172	FLJ10769	26.7878	25.1357	26.7776	25.974	24.5477	26.5727	0.262501	0.535563
IPI00902744	FLJ32810	27.9508	27.3563	26.9905	27.3727	26.7984	26.5707	0.635866	0.518623
IPI00333541	FLNA	34.9146	34.9146	34.8816	35.1425	35.0176	35.0918	2.04999	-0.180378
IPI00553169	FLNA	26.8433	24.9339	26.5681	26.3505	25.0768	26.5982	0.0480979	0.106637
IPI00900293	FLNB	34.8224	34.8978	34.6345	34.5408	34.555	34.1945	1.17909	0.354827
IPI00178352	FLNC	33.2233	33.1937	33.3376	32.97	32.848	33.1535	1.23748	0.260983
IPI00027438	FLOT1	29.6443	29.4666	29.7754	28.2209	28.5675	28.4559	3.06236	1.21401
IPI00795979	FLOT2	29.4542	29.6347	29.308	29.303	29.8193	28.662	0.230148	0.204208
IPI00044748	FMNL2	28.1843	28.3353	27.5712	27.5697	27.3988	27.2684	1.16511	0.617981
IPI00947119	FMNL2	23.1739	21.6656	19.8716	22.0948	20.7895	19.3802	0.263516	0.815599
IPI00847544	FMNL3	24.8751	23.6893	24.5252	24.9086	23.0846	23.8574	0.258928	0.412948
IPI00412343	FMR1	28.6931	28.8776	28.6392	28.6044	28.7971	28.5947	0.29557	0.0712566
IPI00855785	FN1	29.2338	29.2086	28.8412	27.67	27.007	27.324	2.80803	1.76087
IPI00099986	FN3KRP	27.0744	26.7226	27.2018	27.3647	26.5441	27.1481	0.0228266	-0.019427
IPI00807625	FNBP1	24.5583	24.5252	25.6385	23.763	23.9082	24.7767	0.716374	0.757961
IPI00170778	FNBP4	24.2347	25.337	26.2444	25.005	26.1559	26.4958	0.345676	-0.613538
IPI00217490	FNDC3B	30.0842	30.1679	29.224	29.6992	29.8815	28.9914	0.301914	0.301349
IPI00026813	FNTA	28.0106	28.1893	28.4286	28.4929	28.7399	28.7487	1.42499	-0.450996
IPI00026817	FNTB	27.1603	27.0556	27.7865	27.6398	27.5746	28.2935	0.707803	-0.501814
IPI00028514	FOLH1	26.7637	26.8455	27.9816	26.1272	26.1244	27.034	0.707	0.7684
IPI00441498	FOLR1	23.6295	23.5232	24.7146	22.6089	22.5533	23.6868	0.884231	1.00607
IPI00011593	FOSL2	24.4562	24.4331	24.1393	25.7238	23.6783	25.2289	0.355937	-0.534122
IPI00290377	FOXC1	23.7871	23.6088	25.599	24.4349	24.0748	25.8492	0.211064	-0.454653
IPI00024386	FOXG1	23.7484	22.538	25.0818	25.7368	22.994	25.5543	0.351023	-0.972312
IPI00006029	FOXK2	24.9144	25.4883	26.1765	25.4719	25.7725	26.6935	0.365401	-0.452948
IPI00220203	FOXP1	22.9597	22.9527	24.1073	24.1539	24.0132	25.1986	0.975504	-1.11535
IPI00395554	FOXP4	24.7112	24.9535	19.0845	25.3503	25.0494	20.3575	0.0954265	-0.669324
IPI00016745	FPGS	21.4757	21.5614	22.8578	23.3975	23.3245	24.4349	1.4243	-1.75401
IPI00004655	FRG1	27.8162	27.3013	27.3425	27.4779	27.1756	27.0472	0.534371	0.253074
IPI00000885	FRK	25.323	25.6942	26.211	24.8469	24.7785	25.6363	0.804119	0.655504
IPI00644865	FRMD4A	25.5174	25.3336	25.1986	23.1876	23.1098	24.4059	1.84493	1.78209
IPI00043622	FRMD6	24.5743	24.3275	25.8885	24.2825	24.2186	25.4893	0.156788	0.266616
IPI00011090	FRMD8	25.9947	26.0544	27.4631	24.8958	25.0041	26.5073	0.66275	1.03496
IPI00878384	FRRS1	23.9734	25.3977	25.0421	23.4877	24.8706	24.5375	0.351813	0.505788
IPI00107698	FRS2	23.8799	23.7397	25.4201	23.4273	23.3495	24.4969	0.378301	0.588666
IPI00739940	FRYL	30.4882	29.1638	24.6272	30.8734	29.6134	24.9523	0.0526355	-0.386649
IPI00747810	FSCN1	35.1996	35.3118	35.7286	34.1138	34.1863	34.6002	2.13684	1.11322
IPI00641635	FTO	25.2345	25.7659	24.9275	25.3689	25.8975	25.5174	0.417262	-0.285282
IPI00004308	FTSJ1	22.6842	22.7972	23.8418	22.5321	23.4286	23.6425	0.064779	-0.0933177
IPI00217686	FTSJ3	26.5224	26.2978	25.8841	27.7584	27.6093	27.2956	2.33042	-1.31969
IPI00334846	FTSJD1	21.7947	20.6431	23.1276	23.4802	22.6739	24.5293	0.88664	-1.70597
IPI00166153	FTSJD2	27.7144	27.5051	27.6153	27.8597	27.8128	27.956	1.63906	-0.264567
IPI00641948	FUBP1	31.9076	31.6486	31.419	32.2339	32.0129	31.8176	0.914206	-0.363085
IPI00377261	FUBP3	30.7381	30.7707	30.4956	30.8055	30.8831	30.7242	0.623703	-0.136124
IPI00012440	FUCA2	23.4931	23.4073	24.6	23.6369	23.5197	24.6793	0.0737377	-0.111843
IPI00645739	FUK	24.9173	24.2718	22.4959	24.4099	24.1481	22.2292	0.108299	0.299259
IPI00217081	FUNDC1	27.3339	28.0581	29.532	25.9997	26.8243	28.269	0.619572	1.27697
IPI00552881	FUNDC2	29.8193	29.9328	28.4435	29.1144	29.2333	27.9953	0.425136	0.617542
IPI00260715	FUS	33.5963	33.9487	34.0372	33.5577	33.7879	33.8316	0.352263	0.134969
IPI00001538	FXC1	26.3182	27	27.2888	26.099	26.6408	27.2018	0.198928	0.2218
IPI00293425	FXN	26.247	26.7311	25.6932	26.665	27.0466	25.9286	0.294385	-0.322958
IPI00016249	FXR1	31.3916	31.801	31.2641	31.56	31.9512	31.4647	0.323049	-0.173112
IPI00797887	FXR1	25.216	25.1621	26.7707	24.9558	25.0665	25.8334	0.29321	0.431026
IPI00016250	FXR2	29.7159	29.4554	28.7542	29.848	29.5798	28.9489	0.14229	-0.150382
IPI00001580	FYCO1	24.5867	24.631	23.7252	24.4673	24.5403	23.5197	0.113882	0.138569
IPI00219012	FYN	23.1148	24.0748	26.0937	22.8033	23.4529	25.1301	0.220363	0.632337
IPI00289907	FYTTD1	22.6198	22.9679	23.7988	21.8538	22.5674	23.1303	0.529505	0.611665
IPI00012442	G3BP1	32.2549	32.1345	31.627	32.6949	32.2653	32.2247	0.730439	-0.389476
IPI00009057	G3BP2	31.4253	31.3949	31.5137	31.4515	31.419	31.7024	0.342075	-0.0796763
IPI00216008	G6PD	32.1371	32.0642	32.0549	32.0149	32.0784	32.0149	0.667497	0.049352
IPI00783097	GA	32.8351	32.8713	32.7409	33.2391	33.2474	33.171	3.03813	-0.40338
IPI00883772	GAA	23.9141	23.9796	22.9649	24.0016	24.1947	22.8149	0.0316405	-0.0508544
IPI00410383	GAB1	22.2265	22.223	22.3152	22.8947	22.8149	22.5593	2.04739	-0.501393
IPI00027253	GABARAP	29.4279	28.9285	28.9952	29.3516	29.2429	28.8484	0.0476337	-0.0304305
IPI00026358	GABARAPL2	26.6596	27.2597	27.0281	26.2642	26.403	25.7725	1.4938	0.835885
IPI00299413	GABPA	28.4904	27.6472	29.3863	28.8776	28.1434	29.7754	0.243013	-0.42419
IPI00549882	GABPB2	23.112	24.3912	24.1011	22.9458	24.5543	25.7912	0.244023	-0.562329
IPI00552587	GADD45GIP1	28.7022	29.1609	30.3097	28.406	28.9194	30.0612	0.142038	0.262124
IPI00298949	GAK	27.3647	27.3811	28.0505	27.1432	27.2948	27.7567	0.276161	0.200559
IPI00872350	GALC	23.7449	23.2312	23.0822	24.2807	23.0671	22.94	0.055966	-0.0765184
IPI00553131	GALE	26.4299	26.3275	27.3259	25.8901	25.5225	26.6828	0.6409	0.662672
IPI00019383	GALK1	29.4589	29.1584	28.7487	29.3962	28.869	28.6374	0.194643	0.15445
IPI00414287	GALK2	27.5334	26.7264	25.8901	26.1193	25.4742	24.7386	0.961437	1.27258
IPI00060200	GALM	26.1085	24.7854	24.8958	24.7698	23.2329	23.3091	1.07026	1.49265
IPI00025818	GALNT1	25.6103	26.8918	27.3935	25.1474	26.5908	26.9029	0.214352	0.41817
IPI00375205	GALNT10	25.0345	24.8351	26.0334	25.1314	24.9658	26.1452	0.076077	-0.113104
IPI00004669	GALNT2	30.7823	30.9643	31.9363	30.1047	30.4591	31.3402	0.505668	0.592959
IPI00004670	GALNT3	19.5016	19.5256	21.3465	23.3091	23.2434	24.3621	2.10873	-3.51363
IPI00328391	GALNT7	27.9733	27.865	28.1434	27.9761	27.6245	27.8527	0.601948	0.176156
IPI00030182	GAMT	24.6848	24.4766	23.8668	24.6123	23.9757	23.5665	0.303075	0.291246
IPI00383581	GANAB	31.543	31.5962	31.2731	31.4878	31.5729	31.3647	0.0123792	-0.00438054
IPI00793922	GAPDH	26.9473	26.5829	26.8203	26.7001	26.2817	26.751	0.489892	0.205854
IPI00788737	GAPDH	35.3299	35.5622	35.2258	35.1727	35.5622	35.3118	0.0541175	0.0237465
IPI00022430	GAPDHS	25.5819	24.843	25.6917	25.4611	24.7197	25.4228	0.181141	0.170998
IPI00292753	GAPVD1	29.6992	30.0895	30.5297	29.9422	30.2999	31.0489	0.329717	-0.324214
IPI00302176	GAR1	27.8807	28.1088	28.6471	29.0351	28.9353	29.3361	1.58831	-0.889936
IPI00025273	GART	31.089	31.2625	31.5389	31.5119	31.7667	31.4253	0.748793	-0.271184
IPI00171123	GATAD1	17.7505	17.7505	19.9687	18.9252	19.1323	20.7512	0.521327	-1.11301
IPI00478128	GATAD2A	24.8469	24.7205	25.192	25.9319	26.0352	25.4215	1.68452	-0.87639
IPI00103554	GATAD2B	29.5214	29.9956	29.9707	30.1362	30.5565	30.6624	1.30966	-0.622456
IPI00641210	GATSL3	22.425	23.5161	23.5634	21.694	23.667	23.3975	0.126353	0.248636
IPI00021807	GBA	29.2291	29.2061	28.3967	28.0342	28.2844	27.4201	1.28801	1.03105
IPI00016077	GBAS	30.1679	30.0282	30.1616	29.7726	29.5639	29.6779	2.39036	0.447758
IPI00296635	GBE1	29.0123	29.1381	30.1574	28.9852	29.1046	30.1026	0.0253953	0.0384324
IPI00021954	GBF1	29.95	29.9028	29.5629	30.2333	30.1076	29.8168	0.644073	-0.247325
IPI00879060	GCAT	29.0896	29.2525	28.7015	28.5699	28.6301	28.3039	1.2566	0.513241
IPI00165138	GCC1	25.3612	24.4395	26.9085	26.1036	24.7627	26.8676	0.132743	-0.341576
IPI00333197	GCC2	26.404	26.5513	26.7758	26.4016	26.7301	26.8372	0.177142	-0.0792694
IPI00024317	GCDH	24.7502	24.5681	25.7797	23.8385	23.6981	24.8593	0.791311	0.900708
IPI00027492	GCH1	23.8233	24.3001	24.3659	24.3185	24.6848	25.0964	0.885867	-0.536771
IPI00217253	GCHFR	27.8401	26.7105	24.5364	25.677	24.1311	21.8884	0.774196	2.46353
IPI00215768	GCLC	27.9816	27.262	26.8446	27.2256	27.2519	27.2669	0.126371	0.114609
IPI00010090	GCLM	28.8448	28.9375	28.3488	28.8346	29.0304	28.3103	0.0173808	-0.0147661
IPI00001159	GCN1L1	32.2874	32.4232	32.378	32.148	32.3026	32.2939	0.8295	0.11473
IPI00873506	GDA	28.2873	28.6576	27.6189	25.1139	26.0894	24.0419	2.02216	3.10619
IPI00014952	GDAP2	25.666	25.706	24.3541	25.1256	25.126	23.242	0.411098	0.744144
IPI00010154	GDI1	30.463	30.3984	30.2159	29.4878	29.3881	29.1584	2.93628	1.01431
IPI00031461	GDI2	33.4741	33.6047	33.2942	33.5159	33.5328	33.2169	0.0936725	0.0358124
IPI00789740	GEMIN4	25.4323	25.6344	22.4133	26.2412	26.1972	23.2312	0.194357	-0.72986
IPI00291783	GEMIN5	28.3153	28.5039	28.2702	29.3317	29.4419	31.3104	1.21108	-1.66484
IPI00154473	GFM1	30.5723	30.5911	30.4499	30.4973	30.4804	30.2753	0.646326	0.120124
IPI00071703	GFM2	23.6868	23.5573	24.7642	23.0671	22.9679	24.1344	0.501068	0.612959
IPI00217952	GFPT1	30.7419	31.0513	31.0148	31.2599	31.6083	31.5883	1.67389	-0.549468
IPI00744361	GGA1	28.4892	28.5496	28.4357	28.4719	28.5053	28.5053	0.0255265	-0.00264676
IPI00296772	GGA2	23.4665	22.365	24.8383	23.0894	22.4732	24.6965	0.0481079	0.136902
IPI00021174	GGA3	25.4589	24.6353	25.5404	25.6344	24.9457	25.7489	0.238163	-0.231511
IPI00031564	GGCT	23.8467	23.7508	23.3574	23.4249	22.997	22.9821	1.16561	0.516955
IPI00305698	GGCX	27.4465	27.103	27.3745	27.042	26.813	27.0744	1.17177	0.331566
IPI00032892	GGPS1	24.4791	25.2326	25.5703	24.0083	24.8527	25.0267	0.443063	0.464763
IPI00855794	GGT5	20.5212	20.6378	22.2465	18.2786	18.4095	20.1173	1.26984	2.20006
IPI00909387	GHITM	27.8465	29.449	29.5041	26.3212	27.9994	27.9452	0.911921	1.51133
IPI00647635	GIGYF2	29.0431	29.793	29.8609	29.0462	29.9322	29.8003	0.0239337	-0.027235
IPI00032387	GINS1	25.7203	25.565	24.9625	25.6199	25.4528	24.647	0.176235	0.176027
IPI00007146	GINS2	24.1563	22.7693	26.3596	25.1166	24.3453	29.6922	0.424018	-1.95631
IPI00893172	GINS3	25.2796	24.8673	22.9706	26.3196	26.0856	23.6981	0.380676	-0.995265
IPI00031614	GINS4	23.6233	26.0167	24.3506	26.5619	26.7572	25.0088	0.737544	-1.44572
IPI00024705	GIPC1	28.3306	28.7518	28.8521	27.7799	28.2657	28.4048	0.933356	0.494702
IPI00328296	GIPC2	22.6089	23.5123	23.7837	22.4401	23.2189	23.5751	0.173387	0.223555
IPI00795611	GIT1	28.7099	29.0281	29.449	28.4999	28.8911	29.1016	0.346065	0.231518
IPI00238218	GIT2	26.3103	28.2635	27.2712	26.4365	27.6153	27.2477	0.0983592	0.181886
IPI00216067	GK;GK3P	27.0625	26.6014	26.2458	26.8889	26.0514	25.7352	0.419869	0.411395
IPI00419234	GK2	25.4333	23.9339	26.4392	26.6893	24.5727	27.5785	0.367383	-1.01135
IPI00025869	GLA	26.0265	26.0147	24.4035	24.7938	26.5606	23.8233	0.164675	0.422357
IPI00796919	GLB1	26.3505	26.0735	24.6464	25.5966	24.9262	23.5692	0.55188	0.992753
IPI00433284	GLCE	26.1955	26.449	25.0267	26.4526	26.8487	25.39	0.213758	-0.340023
IPI00301647	GLE1	23.5019	22.8482	22.6449	23.7185	23.3132	22.9706	0.425445	-0.335774
IPI00414717	GLG1	32.0274	31.9709	31.7633	31.6754	31.6773	31.4838	1.39827	0.308323
IPI00018889	GLI3	20.9781	21.8728	26.9155	22.4919	21.0176	27.8286	0.0658055	-0.523923
IPI00007067	GLIPR2	28.4697	28.8412	28.5934	28.1793	28.5803	28.3371	0.776383	0.269176
IPI00074604	GLMN	24.3789	24.6934	22.6412	24.8527	24.9926	23.0933	0.175255	-0.408391
IPI00220766	GLO1	32.7162	32.5859	32.485	32.513	32.3977	32.2527	0.966622	0.207892
IPI00032575	GLOD4	29.0198	29.4102	29.5006	28.892	29.3399	29.3174	0.24181	0.127093
IPI00008552	GLRX3	30.7574	30.5839	30.4645	31.4787	31.2546	31.2374	2.47958	-0.721636
IPI00333763	GLRX5	28.9527	28.5675	27.9131	28.8304	28.2873	27.8108	0.148092	0.168245
IPI00289159	GLS	31.7336	31.6141	31.0947	31.1656	31.078	30.586	0.943917	0.537657
IPI00215687	GLS	26.7001	26.884	26.2039	26.4971	26.5829	26.0147	0.357434	0.231143
IPI00168262	GLT25D1	30.8874	30.6057	30.5198	30.8131	30.6914	30.4527	0.041175	0.0185566
IPI00184363	GLTP	28.269	27.9733	29.0918	28.4023	28.192	29.2287	0.129955	-0.162906
IPI00016801	GLUD1	33.1617	33.1345	33.0672	32.7079	32.7409	32.6394	3.31014	0.425046
IPI00000155	GLYR1	28.6773	29.3068	28.9776	29.1584	29.7577	29.1802	0.637674	-0.378169
IPI00030207	GMDS	32.6355	32.3456	32.7079	31.8736	31.6596	32.1276	1.74417	0.676063
IPI00642048	GMDS	24.1031	24.7438	25.215	23.3021	23.8914	24.3506	0.883334	0.839259
IPI00008601	GMEB1	23.077	24.5665	23.5982	24.5477	25.1243	24.7698	1.07232	-1.06673
IPI00159770	GMEB2	25.3736	25.6212	25.7646	26.5082	26.6444	26.3758	2.58485	-0.923
IPI00412987	GMFB	30.7304	30.7292	31.56	30.8223	30.7645	31.672	0.0691015	-0.079738
IPI00657888	GMPPA	25.5703	27.0036	25.4344	25.1818	26.6394	25.486	0.127918	0.233681
IPI00002496	GMPPB	28.2288	28.8975	29.3412	28.1177	28.8266	28.9194	0.187285	0.201275
IPI00449197	GMPR2	28.654	28.8282	29.1535	29.22	29.5812	29.7726	1.38087	-0.646034
IPI00029079	GMPS	31.4156	31.6393	31.6141	31.942	32.208	32.1529	2.14421	-0.544592
IPI00305551	GNA11	22.7803	23.667	23.3919	22.7556	23.3383	22.994	0.330624	0.250411
IPI00290928	GNA13	29.4143	29.4833	28.4342	29.0703	29.3911	28.1619	0.179491	0.236165
IPI00748145	GNAI2	32.2247	32.359	32.1664	31.557	31.5137	31.4915	3.57548	0.729287
IPI00220578	GNAI3	28.0083	28.0651	28.1413	27.6279	27.4994	27.7501	2.25483	0.445777
IPI00398700	GNAO1	29.2159	29.2003	29.7848	29.0192	29.1962	29.6906	0.129912	0.0983493
IPI00288947	GNAQ	27.6144	28.3209	27.9057	27.0813	27.9249	27.521	0.618017	0.437944
IPI00095891	GNAS	29.7424	29.0304	29.6481	29.5304	29.0016	28.9042	0.481653	0.328227
IPI00026268	GNB1	32.6427	32.6711	33.4507	32.4072	32.3369	33.0966	0.357235	0.30792
IPI00003348	GNB2	31.8069	31.5137	31.5835	31.4156	31.0532	31.1783	1.41167	0.418994
IPI00848226	GNB2L1	34.3511	34.282	33.9233	34.8014	34.6525	34.2599	0.858219	-0.385784
IPI00896504	GNE	28.3195	28.6699	28.2297	28.819	29.263	28.9293	1.46402	-0.597366
IPI00221232	GNG12	27.5598	27.3118	28.1728	26.6408	26.4615	27.3303	1.11183	0.870611
IPI00027240	GNG5	28.3371	28.3533	28.9114	28.1005	28.4023	28.8812	0.0872656	0.0726096
IPI00396387	GNL1	29.4624	29.8994	30.124	29.3703	29.9058	30.1219	0.0334087	0.0292842
IPI00015808	GNL2	25.0846	26.0586	24.5778	26.8954	27.3641	26.1316	1.29432	-1.55666
IPI00306380	GNL3	27.9437	27.6316	28.4904	29.2227	28.9612	29.9402	1.60737	-1.35285
IPI00005132	GNL3L	24.6905	24.1539	24.3634	24.6717	24.0066	24.4898	0.0174595	0.0132745
IPI00005677	GNPAT	26.8296	26.4352	27.1278	26.1982	26.1472	26.6507	0.842023	0.46548
IPI00009305	GNPDA1	30.2333	30.3447	29.5272	29.3486	29.5732	28.6149	1.04095	0.856143
IPI00550894	GNPDA2	23.1581	25.2877	25.3681	23.1909	25.3318	25.1155	0.019622	0.0585486
IPI00061525	GNPNAT1	27.4599	27.2144	27.1364	27.724	27.6876	27.3542	0.976379	-0.318403
IPI00382432	GNPTAB	25.2929	25.1067	22.9803	24.3401	24.1595	26.0758	0.155111	-0.398466
IPI00908404	GNS	29.3765	29.6607	28.7087	28.3339	28.6566	27.4648	1.13578	1.09687
IPI00031115	GOLGA1	24.3185	24.1774	25.4255	24.7587	24.6096	25.8103	0.313536	-0.419098
IPI00413895	GOLGA2	25.6606	27.8807	25.0291	26.6956	26.7441	24.8908	0.025301	0.0799408
IPI00305267	GOLGA3	28.4629	27.8207	27.643	28.8055	27.741	27.7523	0.10334	-0.124055
IPI00927614	GOLGA4	27.9534	26.7332	26.6673	27.1323	26.7038	27.113	0.11079	0.134928
IPI00294065	GOLGA5	27.9665	28.4601	29.0855	27.6189	28.0139	28.6566	0.38756	0.407552
IPI00480022	GOLGA7	27.1516	27.728	27.9641	27.3935	27.8482	28.1895	0.229945	-0.195816
IPI00796891	GOLGB1	26.8251	25.6103	28.0371	26.3774	25.1222	27.4029	0.210858	0.523342
IPI00004962	GOLIM4	29.449	28.9028	28.9601	29.566	28.7087	29.3721	0.131545	-0.111631
IPI00171411	GOLM1	25.1574	24.79	26.592	25.2097	25.2326	26.7863	0.109643	-0.229767
IPI00005490	GOLPH3	28.5321	28.7249	27.8749	28.2187	28.2969	27.2083	0.466989	0.469336
IPI00514951	GOLPH3L	26.1347	26.112	27.042	26.2731	26.0925	27.3524	0.103302	-0.143117
IPI00007061	GOLT1	24.3778	24.8395	24.6965	24.04	24.988	25.5304	0.178929	-0.214854
IPI00186721	GOPC	25.4133	26.2923	23.9757	24.1774	25.6048	24.0262	0.301415	0.624294
IPI00011074	GORASP1	24.04	23.711	21.3146	25.4883	24.8057	21.965	0.315854	-1.06449
IPI00743931	GORASP2	30.2753	30.1551	31.0254	30.3561	30.2047	31.0403	0.0441304	-0.0484085
IPI00029447	GOSR1	28.4378	28.148	27.9194	28.1105	27.737	27.4573	0.762306	0.400092
IPI00216965	GOSR2	27.8108	27.2331	26.7127	27.2935	26.9099	26.3596	0.40432	0.397914
IPI00219029	GOT1	32.3554	32.1202	32.0032	31.5448	31.5782	31.1559	1.89754	0.733304
IPI00018206	GOT2	34.2307	34.1494	34.0592	33.1535	33.1113	33.0043	4.03703	1.05668
IPI00021594	GPAA1	28.4329	28.3222	27.5733	27.8896	27.5624	26.79	0.755149	0.695432
IPI00844249	GPAM	27.5351	27.5733	28.5773	26.6081	26.2198	26.9325	1.51679	1.3084
IPI00550477	GPATCH1	24.0307	22.0026	25.5156	24.6297	22.0232	24.6193	0.0230438	0.0922381
IPI00457284	GPATCH8	25.4228	26.1695	26.4715	26.0334	26.6743	27.2552	0.60219	-0.633048
IPI00015688	GPC1	27.0014	26.1166	25.2542	25.977	25.4666	23.8418	0.557884	1.02895
IPI00911077	GPC6	25.5225	25.2683	25.5563	26.9979	26.8328	27.0433	3.76824	-1.50892
IPI00099820	GPCPD1	26.0167	26.4653	26.4971	25.3462	25.5828	25.5512	2.0774	0.832957
IPI00295777	GPD1	27.7943	28.0624	26.6743	27.6025	27.934	26.6614	0.0678618	0.110994
IPI00032959	GPD1L	32.1685	32.378	32.2283	31.2313	31.5502	31.5542	2.55607	0.813072
IPI00017895	GPD2	32.148	31.9464	31.2673	31.2703	31.0037	30.516	1.16482	0.857214
IPI00910781	GPI	29.9918	30.2793	28.2083	29.9328	29.928	28.1909	0.0566494	0.142549
IPI00019952	GPM6A	25.3529	25.1655	26.0684	24.0357	23.9002	25.3383	0.967324	1.10419
IPI00027035	GPN1	21.0833	23.1098	22.5225	22.2465	23.7537	22.8973	0.416352	-0.72729
IPI00856080	GPN3	22.9432	22.9222	24.0867	23.5613	23.4589	24.6123	0.452912	-0.560104
IPI00413788	GPR107	27.2236	26.3625	25.0164	27.4994	26.4161	25.1426	0.0560194	-0.15188
IPI00217056	GPR162	23.6374	22.8787	22.7417	24.2851	22.6915	22.5321	0.045737	-0.0836283
IPI00384961	GPR177	29.6409	29.3635	29.6599	28.5814	27.8309	28.2099	2.32624	1.3474
IPI00646291	GPR180	22.4959	21.6057	23.6804	22.5278	21.8331	23.6374	0.0304152	-0.0721092
IPI00472858	GPR89A;GPR89B	21.965	22.0232	23.2518	21.3146	21.3871	22.7876	0.385643	0.583552
IPI00414289	GPS1	30.8536	30.49	30.8874	31.1957	30.7799	31.117	0.730426	-0.287219
IPI00479065	GPSM1	27.48	27.8849	27.1949	27.5244	28.0255	26.5818	0.110306	0.142708
IPI00217458	GPT	26.2093	25.785	26.5362	25.501	24.2614	25.3823	1.17705	1.12858
IPI00152432	GPT2	29.8901	30.0612	29.6754	29.3921	29.4189	29.2402	1.86749	0.525156
IPI00884192	GPX4	29.4078	29.224	29.0759	29.263	28.9418	28.4435	0.617299	0.353149
IPI00045798	GPX7	29.1513	29.1469	29.9402	29.8003	29.8003	30.5749	0.809402	-0.645702
IPI00021327	GRB2	29.9422	30.0246	29.4531	29.7177	29.6334	28.9866	0.546611	0.360693
IPI00885180	GREB1L	30.646	30.1953	27.0138	31.1612	30.7419	27.6642	0.132251	-0.570726
IPI00550682	GRHPR	27.7198	27.6847	27.9695	27.5051	27.5654	27.8869	0.394627	0.138831
IPI00607628	GRIPAP1	27.871	27.9969	27.7629	27.8632	27.4874	27.6371	0.768265	0.214367
IPI00414058	GRK5	24.4059	24.4278	21.5969	24.1523	23.8385	20.8134	0.141421	0.542121
IPI00334715	GRLF1	28.0472	27.8781	27.0014	27.6763	27.4475	27.0837	0.260053	0.239698
IPI00296713	GRN	27.6245	28.4647	28.7099	25.1667	25.7696	26.0489	2.46645	2.60459
IPI00029557	GRPEL1	31.2969	31.4813	31.5048	30.7429	30.9326	30.9664	2.33394	0.547051
IPI00478657	GRSF1	26.4182	24.0621	25.4893	26.8411	24.5867	25.8053	0.168114	-0.421198
IPI00027831	GRWD1	27.0823	26.8276	26.7139	27.9379	27.9363	27.5876	2.39277	-0.945992
IPI00397836	GSG2	21.7208	20.0052	21.9595	23.6295	22.1046	23.0446	1.05087	-1.69773
IPI00292228	GSK3A	27.0433	26.7087	27.4436	27.3047	27.4234	27.6581	0.773164	-0.396844
IPI00216190	GSK3B	29.6148	29.4934	30.2333	29.4	29.4207	29.7497	0.43012	0.257021
IPI00026314	GSN	35.2258	35.2258	35.4026	33.69	33.6605	33.8941	4.08332	1.53652
IPI00910513	GSPT1	31.6773	31.9967	32.3827	32.0218	32.3272	32.6816	0.509345	-0.324625
IPI00016862	GSR	30.5029	30.3289	30.8104	30.8693	30.6816	31.1367	0.837534	-0.348426
IPI00010706	GSS	28.8755	28.6812	28.6821	28.7889	28.5334	28.4745	0.563147	0.147315
IPI00005659	GSTA4	29.4762	30.0688	30.3603	28.0378	28.3846	28.8911	1.88456	1.53061
IPI00647885	GSTM1	33.3004	33.1677	33.3184	31.9967	31.801	31.9512	4.22666	1.34583
IPI00645711	GSTM2	17.8719	17.8719	20.0776	16.8398	16.8398	17.8719	0.811336	1.42329
IPI00246975	GSTM3	23.9556	25.5201	25.0235	23.1493	25.0865	24.2061	0.39994	0.685781
IPI00008770	GSTM4	26.8146	24.9794	27.4416	26.6499	23.6031	26.3422	0.292515	0.880161
IPI00419235	GSTM5	34.0372	34.2955	34.9741	32.1571	32.3663	33.2474	1.87642	1.84535
IPI00642432	GSTM5	28.5657	29.271	28.4629	27.4124	28.1728	27.346	1.42315	1.12282
IPI00019755	GSTO1	31.0045	31.2546	31.7306	30.624	30.8931	31.3746	0.526472	0.366021
IPI00219757	GSTP1	29.063	29.5886	29.733	28.5773	29.0123	29.3418	0.738655	0.484439
IPI00004350	GTF2A1	27.307	26.4442	26.4442	27.2597	26.4582	26.257	0.0606956	0.0735257
IPI00337314	GTF2A1L;STON1-GTF2A1L	26.3058	26.9473	26.5412	26.0389	26.7841	26.6108	0.153288	0.120178
IPI00022820	GTF2B	27.7204	27.824	27.5015	27.9986	28.0559	27.6894	0.717219	-0.232659
IPI00019977	GTF2E1	26.8889	25.9916	25.9483	27.1562	26.2093	26.2826	0.25062	-0.273065
IPI00019981	GTF2E2	28.3002	28.4621	27.9043	28.7487	28.8196	27.5409	0.120435	-0.147528
IPI00017450	GTF2F1	28.932	28.5877	28.9683	29.3193	28.8975	29.259	0.854653	-0.329286
IPI00477686	GTF2F2	30.2094	29.8448	30.5562	30.7128	30.3289	30.948	0.774966	-0.459775
IPI00030380	GTF2H1	20.6289	20.0556	22.3105	19.8113	20.5301	21.7583	0.123448	0.298413
IPI00426640	GTF2H2	23.3228	23.583	23.6322	23.8864	23.431	23.8799	0.543355	-0.219741
IPI00100791	GTF2H3	23.4474	23.3574	24.557	22.5259	22.4888	23.6369	0.771805	0.903406
IPI00016839	GTF2H4	22.6314	29.0486	23.4005	23.2469	28.6075	24.7989	0.0712986	-0.524237
IPI00054042	GTF2I	30.8104	30.513	29.8766	30.9894	30.6377	30.8846	0.674032	-0.437213
IPI00414482	GTF3C1	26.3712	25.3462	25.8053	26.7176	25.9781	25.873	0.366005	-0.348711
IPI00878252	GTF3C2	26.6542	26.8704	27.8128	27.4107	27.4844	28.222	0.604018	-0.593224
IPI00015806	GTF3C3	25.7489	26.1642	26.0544	26.3811	26.7604	26.7593	1.65769	-0.644437
IPI00016725	GTF3C4	29.9591	29.0951	28.7005	29.6056	28.9497	28.8833	0.0854225	0.10537
IPI00879210	GTF3C5	24.2865	25.2768	26.1743	24.9207	25.945	26.8648	0.352815	-0.664303
IPI00010463	GTPBP1	31.078	30.0195	29.8617	30.8295	30.474	30.0413	0.104082	-0.128542
IPI00167638	GTPBP10	22.5304	23.4415	21.3406	22.9067	23.4839	21.4547	0.0726696	-0.17762
IPI00385042	GTPBP4	27.4304	27.221	26.6178	28.2702	28.045	27.4607	1.14613	-0.835565
IPI00745708	GTPBP8	22.471	21.0864	20.3319	21.689	21.2639	19.9407	0.151356	0.331928
IPI00296563	GUF1	26.6168	25.4986	27.5241	26.6434	24.9839	27.1688	0.11595	0.281142
IPI00514926	GUK1	27.5733	27.4151	25.8156	27.6489	27.1466	25.5048	0.0684332	0.167902
IPI00790010	GULP1	26.1401	27.3405	28.3381	25.9259	27.6162	28.3533	0.00878402	-0.0256106
IPI00180386	GYG1	29.3102	29.2296	28.6514	29.0161	29.3293	28.7005	0.0608539	0.0483665
IPI00006742	GYG2	27.9953	27.2079	28.4378	27.3774	26.978	27.9969	0.388417	0.429544
IPI00303868	GYS1	30.2071	30.1334	29.9342	30.1375	30.4378	30.2362	0.676099	-0.178951
IPI00033892	GZF1	23.4529	24.3253	25.7452	23.5447	24.4254	25.7238	0.0205842	-0.0568415
IPI00023406	H	30.1966	29.9134	30.394	29.616	29.2831	29.6872	1.57173	0.639252
IPI00550239	H1F0	33.3962	33.874	33.5328	32.7508	33.0194	33.2106	1.44802	0.607344
IPI00913961	H2AFV	29.0241	29.3486	30.2404	28.4759	28.8975	29.8074	0.373804	0.47745
IPI00219037	H2AFX	25.4637	24.7005	24.1508	25.7646	25.1684	24.1201	0.149507	-0.246013
IPI00219038	H3F3B	30.7047	30.9273	31.1783	30.1714	30.7355	30.7823	0.713605	0.373692
IPI00607861	H6PD	29.5886	29.625	29.987	29.0793	29.2574	29.6658	0.863106	0.399379
IPI00018583	HABP4	23.7757	23.6322	20.1569	22.1665	22.2015	19.0258	0.366984	1.39036
IPI00298406	HADH	31.0826	31.3986	30.516	30.2454	30.9449	29.7128	0.725517	0.698013
IPI00031522	HADHA	32.9208	32.8238	32.1202	32.0377	31.9464	31.3949	1.20777	0.828618
IPI00383695	HADHB	31.419	31.6944	31.2104	30.5198	30.9192	30.3538	1.74072	0.843653
IPI00022793	HADHB	32.5093	32.2371	31.9678	31.8197	31.3154	31.1814	1.48474	0.79923
IPI00003933	HAGH	30.5576	30.5723	31.48	29.1995	29.063	30.1757	1.39569	1.39056
IPI00021808	HARS	30.9353	30.7147	30.4119	31.7972	31.1762	31.7815	1.61398	-0.897654
IPI00027445	HARS2	20.8311	19.7157	20.0253	20.6431	19.5016	19.917	0.133023	0.170138
IPI00024719	HAT1	29.8003	29.6926	29.2721	30.6515	30.5066	30.2531	1.9445	-0.882049
IPI00431082	HAUS1	21.694	21.694	22.5022	22.8162	22.3607	22.8893	1.07862	-0.725306
IPI00029372	HAUS3	24.2686	23.7537	24.1977	24.7165	24.5743	24.6848	1.60724	-0.585144
IPI00010440	HAX1	25.2733	25.2197	24.4898	24.6449	24.6965	24.1563	0.742847	0.495006
IPI00410714	HBA1	24.9601	23.0516	26.6625	21.4312	17.3842	23.0009	1.02047	4.28595
IPI00009070	HBS1L	26.1369	26.1626	26.4478	26.1205	26.3642	26.6256	0.274875	-0.120974
IPI00012831	HBXIP	30.0069	30.6084	30.5902	29.5698	30.2445	30.1788	0.622908	0.404167
IPI00909163	HCCA2	24.5375	25.234	23.9968	24.4008	24.8663	24.1855	0.0913579	0.105277
IPI00019848	HCFC1	30.3447	30.19	30.4718	30.7015	30.6171	30.8557	1.65341	-0.389289
IPI00002469	HCFC2	25.0818	24.4642	26.0586	25.4787	25.0482	26.2731	0.272271	-0.39849
IPI00026156	HCLS1	27.3689	27.6763	28.0961	28.751	28.8812	29.2611	2.06374	-1.25066
IPI00013774	HDAC1	32.1978	32.0523	31.3136	32.4939	32.359	31.7424	0.407036	-0.343813
IPI00012439	HDAC10	19.0258	19.1713	21.0955	20.3106	20.4845	22.0151	0.612538	-1.17256
IPI00289601	HDAC2	30.1522	30.0387	29.0734	30.646	30.4403	29.5514	0.404731	-0.457809
IPI00217965	HDAC3	24.5504	23.695	24.5154	24.8654	23.3876	24.1021	0.0947264	0.135224
IPI00010088	HDAC4	25.0267	26.0925	25.7411	25.5703	26.5686	25.9947	0.424733	-0.424442
[truncated: 3,428 more rows]
